# Supplementary material
Source: HighWire-hosted journal article supplement (https://cmajopen.ca/highwire/filestream/87309/field_highwire_adjunct_files/0/2021-0071-1-at.pdf)
Supplement: 2021-0071-1-at.pdf [file 2021-0071-1-at.pdf]

## Supplemental Material

|                                                                                                                                                                                                                    |           |
|--------------------------------------------------------------------------------------------------------------------------------------------------------------------------------------------------------------------|-----------|
| <b>Section 1. Data sources used for this study. ....</b>                                                                                                                                                           | <b>2</b>  |
| <b>Section 2. Administrative definition used to define the covariates. ....</b>                                                                                                                                    | <b>6</b>  |
| <b>Section 3. Coding definitions used to exclude patients with potential appropriate indications for benzodiazepine, antipsychotic, or gastric acid suppressant medication.....</b>                                | <b>8</b>  |
| <b>Section 4. Prescription medication names and Drug Identification Numbers (DINs) used to define the three medication groups of interest (antipsychotics, benzodiazepines and gastric acid suppressants).....</b> | <b>10</b> |
| <b>Section 5. Administrative data definitions used to define fall or fracture. ....</b>                                                                                                                            | <b>60</b> |
| <b>Section 6. Cohort description for patients who were dispensed an antipsychotic or a benzodiazepine during the study period.....</b>                                                                             | <b>61</b> |

## **Section 1.** Data sources used for this study.

### **1. Cerner's Electronic Medical Record System**

Cerner's electronic medical record system is shared across London's three hospitals. It contains information about all patient hospitalizations (visits) and is continually updated with events like registration, admission, laboratory results, physician orders, medication administration, and electronic medication reconciliation completion. CERNER data was used to identify eligible patient hospitalizations, to flag inpatients who were prescribed a medication of interest during their hospital stay, and to identify the type of service (medical, surgical, geriatric, other) a patient received during hospitalization.

### **2. Ontario Drug Benefit Database**

This database contains prescription medication data for all outpatient medications dispensed as part of the Ontario Drug Benefit Program, which provides prescription drug coverage to all Ontario residents over the age of 65. Each medication is coded with a unique Drug Identification Number (DIN) and each record represents a drug claim (i.e. a dispensed prescription) paid for by the Ontario Ministry of Health and Long Term Care. This database is >99% accurate compared to manual prescription review.(1) Main data elements include: DIN (drug identifier), quantity, cost, patient, pharmacy and physician identifiers, date prescription was dispensed and a long-term care indicator. We used ODB to exclude patients with baseline use of relevant medications, to define our primary process outcome, and to measure patient characteristics such as polypharmacy.

### **3. Canadian Institute for Health Information (CIHI) Discharge Abstract Database and Same-Day Surgery Database**

These databases store demographic, diagnostic, and procedural variables for all acute hospital admissions and outpatient surgeries in Ontario. Trained personnel extract information from patient records using ICD-10 codes and Canadian Coding for Health Interventions codes to create records for each patient encounter. Previous quality assessments have demonstrated good accuracy and completeness, with reabstraction studies showing >80% agreement with the top 50 main diagnosis codes when compared with reabstracted medical records.(2) We used DAD and SDS to identify eligible and ineligible discharge episodes, to define our primary clinical outcome, and to measure a variety of patient characteristics.

### **4. Ontario Health Insurance Plan (OHIP) Claims History Database**

All physicians treating patients in Ontario are reimbursed by OHIP on a fee-for-service basis, and these claims are paid out by OHIP are contained in the OHIP database. Fee-for-service payments have good accuracy and completeness.(3) Information collected in the claims include patient and physician identifiers (e.g. physician number and specialty), fee codes for services provided, associated diagnoses and the date service was provided. We used OHIP to exclude identify eligible and ineligible discharge episodes, to define our primary clinical outcome, and to measure patient characteristics such as prior medical conditions.

#### 5. Registered Persons Database

The RPDB provides basic demographic information (such as age, sex, postal code of residence, and date of death for deceased individuals) for all Ontario citizens. RPDB is enriched using other datasets also held by ICES. We used RPDB to apply inclusion and exclusion criteria such as restricting the age of patient hospitalizations, and to measure patient characteristics such as age, neighbourhood income quintile and sex.

#### 6. National Ambulatory Care Reporting System (NACRS)

NACRS captures information on patient visits to hospitals and community-based ambulatory care services. These services include visits to the ED (Emergency Department), day surgeries, and outpatient clinics. Demographic information as well as clinical, administrative, financial, and service-specific data are collected into the database.<sup>(4)</sup> We used NACRS to identify eligible and ineligible discharge episodes, to define our primary clinical outcome, and to measure inpatient admissions from the ED as a patient characteristic.

#### 8. Corporate Provider Database (CPDB)

The CPDB contains files maintained by the MOHLTC Provider Services branch with information on all physicians in the province who are funded by the Ministry. ICES receives information on demographics, specialty and practice location of physicians.

#### 7. ICES Physician database (IPDB)

Data on all Ontario physicians by fiscal-year is contained within IPDB. Data contained in the IPDB includes physician demographics (gender, sex), specialty (functional and certified), location, and measures of physician activity (billings, workload, types or services provided). This data can be used for tasks including physician profiling, predicting physician behaviour, and measuring physician supply.

#### 8. The Drug Information Database

This file is housed at ICES and contains a near exhaustive list of DINs (Drug Identification Number) used in Canada from 1990 onwards. This file is supplied by IQVIA Solutions Canada Inc and includes product names, subclass information, PCG codes, drug strength, route of administration and first and last dispensing dates from ODB. We used this file to create a druglist to apply as exclusion criteria and to use in exposure and outcome ascertainment.

#### 9. Institution Information System (INST)

INST is a series of datasets that contain information about Ontario health care institutions funded by the MOHLTC. We used INST to exclude patient hospitalizations that were not discharged from our hospitals of interest.

#### 10. Ontario Hypertension dataset (HYPER)

HYPER is an ICES-derived cohort which captures prevalent and incident cases of patients with hypertension in Ontario from 1991 onwards. ICES-derived cohorts are datasets, not disease registries, which have been developed in-house to identify individuals with specific diseases. Validation studies for these cohorts usually involve medical chart reviews, producing sensitivity, specificity, positive

(PPV) and negative predictive values (NPV). For the HYPER database cases of hypertension are identified with 72% sensitivity, 95% specificity, an 87% PPV and an 88% NPV.(5) We used HYPER to measure hypertension as a patient characteristic.

#### 11. Ontario Chronic Obstructive Pulmonary Disease dataset (COPD)

COPD is another ICES-derived cohort and captures prevalent and incident cases of patients in Ontario with Chronic Obstructive Pulmonary Disease (COPD) from 1991 onwards. The COPD sensitive cohort has an 85% sensitivity and 78.4% specificity, and the COPD specific cohort has a sensitivity of 57.5% and a specificity of 95.4%.(6) We used the COPD dataset to measure COPD as a patient characteristic.

#### 12. Ontario Rheumatoid Arthritis dataset (ORAD)

Prevalent and incident cases of patients >15 years old in Ontario with rheumatoid arthritis are identified in the ICES-derived dataset ORAD. Cases from 1991 onwards are captured in the dataset, and the dataset has a sensitivity of 78%, a specificity of 100%, a PPV of 78% and an NPV of 100%.(7) We used ORAD to measure arthritis as a patient characteristic.

#### 13. Ontario Diabetes dataset (ODD)

ODD is another ICES-derived dataset, and it captures prevalent and incident cases of patients in Ontario with diabetes from 1991 onwards. Specifically, the dataset is made up of three cohorts- children/youth (<=18 years old), a sensitive cohort (19+) and a specific cohort (19+) with the case definitions being slightly different for each. The validation values for the children/youth cohort are as follows: 82.8% sensitivity, 98.9% specificity. The sensitive cohort (19+) has a sensitivity of 90.0%, a specificity of 97.7% and a PPV of 82.6% while the specific cohort (19+) has a sensitivity of 79.9%, a specificity of 99.1% and a PPV of 91.4%.(8) We used ODD to measure diabetes as a patient characteristic.

## References

1. Levy AR, O'Brien BJ, Sellors C, Grootendorst P, Willison D. Coding accuracy of administrative drug claims in the Ontario Drug Benefit database. *The Canadian journal of clinical pharmacology*. 2003;10(2):67–71.
2. Juurlink D, Croxford R, Chong A, Austin P, Tu J, Laupacis A. Canadian Institute for Health Information Discharge Abstract Database: A Validation Study. Institute for Clinical Evaluative Sciences; 2006. (Institute for Clinical Evaluative Sciences).
3. Raina P, Torrance-Rynard V, Wong M, Woodward C. Agreement between self-reported and routinely collected health-care utilization data among seniors. *Health services research*. 2002 Jun;37(3):751–74.
4. NACRS Data Elements 2018–2019. <https://www.cihi.ca/sites/default/files/document/nacrs-dataelements-2018-2019-en.pdf>. 2011 Mar 23;1–7.
5. Tu K, Campbell NR, Chen Z-L, Cauch-Dudek KJ, McAlister FA. Accuracy of administrative databases in identifying patients with hypertension. *Open Medicine Peer-reviewed Indep Open-access J*. 2007;1(1):e18-26.
6. Gershon AS, Wang C, Guan J, Vasilevska-Ristovska J, Cicutto L, To T. Identifying Patients with Physician-Diagnosed Asthma in Health Administrative Databases. *Can Respir J*. 2009;16(6):183–8.

7. Widdifield J, Bombardier C, Bernatsky S, Paterson JM, Green D, Young J, et al. An administrative data validation study of the accuracy of algorithms for identifying rheumatoid arthritis: the influence of the reference standard on algorithm performance. *Bmc Musculoskelet Di*. 2014;15(1):216.
8. Hux JE, Ivis F, Flintoft V, Bica A. Diabetes in Ontario: determination of prevalence and incidence using a validated administrative data algorithm. *Diabetes care*. 2002 Mar;25(3):512–6.

**Section 2.** Administrative definition used to define the covariates.

|                                              | Data sources         | Variable/Codes                                                                                                                                                                                                                                                                                                       |
|----------------------------------------------|----------------------|----------------------------------------------------------------------------------------------------------------------------------------------------------------------------------------------------------------------------------------------------------------------------------------------------------------------|
| Charlson comorbidity score                   | CIHI-DAD             | Deyo, R., Cherkin, D. & Ciol, M. Adapting a clinical comorbidity index for use with ICD-9-CM administrative databases. <i>Journal of clinical epidemiology</i> <b>45</b> , 613–619 (1992).                                                                                                                           |
| Hospital los                                 | CIHI-DAD             | LOS variable                                                                                                                                                                                                                                                                                                         |
| Primary care visits in past year             | OHIP                 | OHIP feecode (A001, A003-A006, A008, A901, A905, A912, C912, K024, K025, Q525, W872, W912)<br>spec= '00'                                                                                                                                                                                                             |
| Specialist care visits in past year          | OHIP                 | spec= '13', '41', '47', '48', '60', '61', '07', '15', '16', '46', '18'<br>(Internal medicine, gastroenterology, respiratory disease, rheumatology, cardiology, endocrinology, neurology, infectious diseases, nephrology, geriatrics, hematology)                                                                    |
| Number of medications in previous year       | ODB                  |                                                                                                                                                                                                                                                                                                                      |
| ED to inpatient transfer                     | NACRS                | TO_TYPE='I' variable                                                                                                                                                                                                                                                                                                 |
| Age                                          | RPDB                 |                                                                                                                                                                                                                                                                                                                      |
| Sex                                          | RPDB                 |                                                                                                                                                                                                                                                                                                                      |
| SES(Income)                                  | RPDB                 | INCQUINT variable                                                                                                                                                                                                                                                                                                    |
| Long term care resident*                     | CCRS                 | RESIDENT_CODE and absence of DISCHARGE_FLAG_IND                                                                                                                                                                                                                                                                      |
| Prior COPD                                   | CIHI-DAD, SDS        | INSTFTYP values=4, 9 variable                                                                                                                                                                                                                                                                                        |
| Prior diabetes                               | OHIP, CIHI-DAD, ODB  | COPD (ICES derived cohort, see data sources)                                                                                                                                                                                                                                                                         |
| Prior hypertension                           | OHIP, CIHI-DAD, SDS  | ODD (ICES derived cohort, see data sources)                                                                                                                                                                                                                                                                          |
| Prior ischemic heart disease**               | OHIP, CIHI-DAD, SDS  | HYPER (ICES derived cohort, see data sources)                                                                                                                                                                                                                                                                        |
| Prior liver disease**                        | CIHI-DAD, OHIP       | ICD-10 (I20-I25); CCP(4802, 4803, 4809, 481); CCI (1IJ50, 1IJ57GQxx, 1IJ76); OHIP dx (410, 412, 413); OHIP feecode (R742, R743, Z434, G298)                                                                                                                                                                          |
| Prior inflammatory bowel disease**           | CIHI-DAD/SDS         | Mild: ICD-10 (B180, B181, B182, B188, B189, K700-K703, K709, K713-K715, K717, K73, K74, K760, K762-K764, K768, K769, Z944)<br>Moderate/Severe: ICD-10 (I850, I859, I864, I982, K704, K711, K721, K729, K765, K766, K767)                                                                                             |
| Prior renal disease**                        | CIHI-DAD/NACRS, OHIP | ICD 10 (K500, K501, K508-K515, K518, K519, M074, M075, M091, M092, K52); OHIP dx (555, 556, 564)                                                                                                                                                                                                                     |
| Prior arthritis                              | CIHI-DAD             | ICD 10 [(R849, R850, G323, G325, G326, G330, G331, G860, G333, G083, G091, G085, G295, G082, G090, G092, G093, G094, G861, G862, G863, G864, G865, G866, G294, G095, G096)***; (E102, E112, E132, E142, I12, I13, N08, N18, N19)****]; CCP (51.95, 66.98)***; CCI (1PZ21HQBR, 1PZ21HPD4)***; OHIP dx (403, 585)****; |
| Prior stroke**                               | CIHI-DAD, OHIP       | ORAD (ICES derived cohort, see data sources)                                                                                                                                                                                                                                                                         |
| Prior cerebrovascular disease (not stroke)** | CIHI-DAD             | ICD 10 [G45 (excl. G45.4), H34.0, H34.1, I60 (excl. I60.8), I61, I63 (excl. I63.6), I64]                                                                                                                                                                                                                             |
| Prior congestive heart failure**             | CIHI-DAD/SDS         | ICD 10 (G45, G46, H340, I60-I69)                                                                                                                                                                                                                                                                                     |
|                                              | CIHI-DAD             | ICD 10 (I50), OHIP dx (428)                                                                                                                                                                                                                                                                                          |

Appendix 1, as supplied by the authors. Appendix to: Welk B, Killin L, Reid JN, et al. Effect of electronic medication reconciliation at the time of hospital discharge on inappropriate medication use in the community: an interrupted time series analysis. *CMAJ Open* 2021. DOI:10.9778/cmajo.20210071. Copyright © 2021 The Author(s) or their employer(s). To receive this resource in an accessible format, please contact us at cmajgroup@cmaj.ca.

|                                      |                |                                                                                                                                           |
|--------------------------------------|----------------|-------------------------------------------------------------------------------------------------------------------------------------------|
| Discharged to nursing home           | CIHI-DAD       | INSTTYPE variable                                                                                                                         |
| ICU admission                        | CIHI-DAD       | SCU variable                                                                                                                              |
| Polypharmacy at admission*****       | ODB            | ≥10 different daily prescription medications in the last year based on DIN groups.                                                        |
| Surgery/procedure performed          | CIHI-DAD       | PRCODE1-10 variable                                                                                                                       |
| Main diagnoses for patient admission | CIHI-DAD       | DX10CODE with dxtype=M                                                                                                                    |
| Prior dementia                       | CIHI-DAD, OHIP | ICD 10 (F000, F001, F002, F009, F010, F011, F012, F013, F018, F019, F020, F021, F022, F023, F024, F028, F03, F04); OHIP dx (290), spec 19 |

\*Long term care resident in 3 months prior to admission or admitted from a long-term care facility

\*\*Defined as per Griffith LE, Gruneir A, Fisher K, et al. Patterns of health service use in community living older adults with dementia and comorbid conditions: a population-based retrospective cohort study in Ontario, Canada. *BMC Geriatrics*. 2016;16(1):1-10. doi:10.1186/s12877-016-0351-x

\*\*\*With chronic dialysis

\*\*\*\*Without chronic dialysis

\*\*\*\*\*Defined as ≥10 prescription medications, as per Onder G, Liperoti R, Foebel A, et al. Polypharmacy and mortality among nursing home residents with advanced cognitive impairment: Results from the shelter study. *Journal of the American Medical Directors Association*. 2013;14(6):450.e7-450.e12. doi:10.1016/j.jamda.2013.03.014

**Section 3.** Coding definitions used to exclude patients with potential appropriate indications for benzodiazepine, antipsychotic, or gastric acid suppressant medication.

| Covariate                                                        | Data sources               | Codes                                                                                                                                                                              |
|------------------------------------------------------------------|----------------------------|------------------------------------------------------------------------------------------------------------------------------------------------------------------------------------|
| Schizophrenia                                                    | NACRS or CIHI-DAD, or OHIP | ICD 10 (F062, F200, F201, F202, F203, F205, F206, F208, F209, F230, F231, F232)<br>OHIP dx (295, spec19)                                                                           |
| Major depressive disorder                                        | NACRS or CIHI-DAD or OHIP  | ICD 10 (F063, F321, F322, F323, F328, F329, F330, F331, F332, F333, F334, F338, F339)<br>OHIP dx (296, 300, 311, spec19)                                                           |
| Bipolar disorder                                                 | NACRS or CIHI-DAD or OHIP  | ICD 10 (F313, F314, F315, F310, F311, F312, F316, F317, F318, F319)<br>OHIP dx (296, spec19)                                                                                       |
| Anxiety disorder                                                 | NACRS or CIHI-DAD or OHIP  | ICD 10 (F064, F410, F411, F412, F413, F418, F419, F400, F401, F402, F408, F409)<br>OHIP dx (300, spec 19)                                                                          |
| Gastrointestinal bleeding                                        | NACRS or CIHI-DAD          | ICD 10 (K922)                                                                                                                                                                      |
| Gastroduodenal ulcer                                             | NACRS or CIHI-DAD or OHIP  | ICD 10 (K260, K261, K262, K263, K264, K265, K266, K267, K269)<br>OHIP dx (532)                                                                                                     |
| Gastroesophageal reflux                                          | NACRS or CIHI-DAD          | ICD 10 (K210, K219)                                                                                                                                                                |
| Dementia                                                         | NACRS or CIHI-DAD or OHIP  | ICD 10 (F000, F001, F002, F009, F010, F011, F012, F013, F018, F019, F020, F021, F022, F023, F024, F028, F03, F04)<br>OHIP dx (290, spec19)                                         |
| Esophagitis                                                      | NACRS or CIHI-DAD or OHIP  | ICD 10 (K20)<br>OHIP dx (530)                                                                                                                                                      |
| Gastrinoma                                                       | NACRS or CIHI-DAD          | ICD 10 (81531, 81533)                                                                                                                                                              |
| Mental and behavioural disorders due to substance use/withdrawal | NACRS or CIHI-DAD          | F100, F101, F102, F103, F104, F105, F106, F107, F108, F109, F130, F131, F132, F133, F134, F135, F136, F137, F138, F139, F190, F191, F192, F193, F194, F195, F196, F197, F198, F199 |
| Psychotic disorders                                              | NACRS or CIHI-DAD or OHIP  | ICD 10 (F230, F231, F232, F233, F238, F239, F28, F29)<br>OHIP dx (298)                                                                                                             |
| Induced delusional disorders                                     | NACRS or CIHI-DAD          | ICD 10 (F24)                                                                                                                                                                       |
| Schizoaffective disorders                                        | NACRS or CIHI-DAD          | ICD 10 (F250, F251, F252, F258, F259)                                                                                                                                              |
| Obsessive compulsive disorders                                   | NACRS or CIHI-DAD or OHIP  | ICD 10 (F420, F421, F422, F428, F429)<br>OHIP dx (300)                                                                                                                             |
| Reaction to severe stress and adjustment disorders               | NACRS or CIHI-DAD or OHIP  | ICD 10 (F430, F431, F432, F438, F439)<br>OHIP dx (309)                                                                                                                             |
| Dissociative disorders                                           | NACRS or CIHI-DAD          | ICD 10 (F440, F441, F442, F443, F444, F445, F446, F447, F448, F449)                                                                                                                |

Appendix 1, as supplied by the authors. Appendix to: Welk B, Killin L, Reid JN, et al. Effect of electronic medication reconciliation at the time of hospital discharge on inappropriate medication use in the community: an interrupted time series analysis. *CMAJ Open* 2021. DOI:10.9778/cmajo.20210071. Copyright © 2021 The Author(s) or their employer(s). To receive this resource in an accessible format, please contact us at [cmajgroup@cmaj.ca](mailto:cmajgroup@cmaj.ca).



---

|                          |                   |                                                   |
|--------------------------|-------------------|---------------------------------------------------|
| Somatoform disorders     | NACRS or CIHI-DAD | ICD 10 (F450, F451, F452, F453, F454, F458, F459) |
| Other neurotic disorders | NACRS or CIHI-DAD | ICD 10 (F480, F481, F488, F489)                   |
| Delirium                 | NACRS or CIHI-DAD | ICD 10 (F050, F051, F059)                         |
| Other mental disorders   | NACRS or CIHI-DAD | ICD 10 (F060)                                     |

---

**Section 4.** Prescription medication names and Drug Identification Numbers (DINs) used to define the three medication groups of interest (antipsychotics, benzodiazepines and gastric acid suppressants).

| Antipsychotics             |          | Benzodiazepines |          | Gastric acid suppressants    |          |
|----------------------------|----------|-----------------|----------|------------------------------|----------|
| AA-CLOZAPINE               | 02248034 | ALPRAZOLAM      | 02400111 | BISMUTH CITRATE & RANITIDINE | 02231831 |
| AA-CLOZAPINE               | 02248035 | ALPRAZOLAM      | 02230074 | CIMETIDINE                   | 02227436 |
| AA-CLOZAPINE               | 02458748 | ALPRAZOLAM      | 01913239 | CIMETIDINE                   | 01916793 |
| AA-CLOZAPINE               | 02458756 | ALPRAZOLAM      | 02137534 | CIMETIDINE                   | 00865796 |
| ABBOTT-OLANZAPINE ODT      | 02414538 | ALPRAZOLAM      | 00865397 | CIMETIDINE                   | 00563560 |
| ABBOTT-OLANZAPINE ODT      | 02414546 | ALPRAZOLAM      | 01913484 | CIMETIDINE                   | 00546232 |
| ABBOTT-OLANZAPINE ODT      | 02414554 | ALPRAZOLAM      | 00548359 | CIMETIDINE                   | 00584215 |
| ACCEL-OLANZAPINE           | 02420538 | ALPRAZOLAM      | 00677485 | CIMETIDINE                   | 00582409 |
| ACCEL-OLANZAPINE           | 02420546 | ALPRAZOLAM      | 02417634 | CIMETIDINE                   | 02229717 |
| ACCEL-OLANZAPINE           | 02420554 | ALPRAZOLAM      | 02400138 | CIMETIDINE                   | 02229718 |
| ACCEL-OLANZAPINE           | 02420562 | ALPRAZOLAM      | 02349205 | CIMETIDINE                   | 00487872 |
| ACCEL-OLANZAPINE           | 02420570 | ALPRAZOLAM      | 02230075 | CIMETIDINE                   | 00397474 |
| ACCEL-OLANZAPINE           | 02420589 | ALPRAZOLAM      | 00677477 | CIMETIDINE                   | 00582417 |
| ACH-QUETIAPINE FUMARATE XR | 02450860 | ALPRAZOLAM      | 00548367 | CIMETIDINE                   | 00546240 |
| ACH-QUETIAPINE FUMARATE XR | 02450879 | ALPRAZOLAM      | 01913492 | CIMETIDINE                   | 02227444 |
| ACH-QUETIAPINE FUMARATE XR | 02450887 | ALPRAZOLAM      | 02137542 | CIMETIDINE                   | 01916815 |
| ACH-QUETIAPINE FUMARATE XR | 02450895 | ALPRAZOLAM      | 01913247 | CIMETIDINE                   | 00865818 |
| ACH-QUETIAPINE FUMARATE XR | 02450909 | ALPRAZOLAM      | 00865400 | CIMETIDINE                   | 02227452 |
| ACT OLANZAPINE             | 02325659 | ALPRAZOLAM      | 02417642 | CIMETIDINE                   | 01916785 |
| ACT OLANZAPINE             | 02325667 | ALPRAZOLAM      | 00813958 | CIMETIDINE                   | 00865826 |
| ACT OLANZAPINE             | 02325675 | ALPRAZOLAM      | 00723770 | CIMETIDINE                   | 00568449 |
| ACT OLANZAPINE             | 02325683 | ALPRAZOLAM      | 00913484 | CIMETIDINE                   | 00603678 |
| ACT OLANZAPINE             | 02325691 | ALPRAZOLAM      | 00913492 | CIMETIDINE                   | 00600059 |
| ACT OLANZAPINE             | 02325713 | ALPRAZOLAM      | 01908170 | CIMETIDINE                   | 00563579 |
| ACT OLANZAPINE ODT         | 02327562 | ALPRAZOLAM      | 01908189 | CIMETIDINE                   | 02229719 |
| ACT OLANZAPINE ODT         | 02327570 | ALPRAZOLAM      | 02018179 | CIMETIDINE                   | 02229720 |
| ACT OLANZAPINE ODT         | 02327589 | ALPRAZOLAM      | 02018187 | CIMETIDINE                   | 00563587 |
| ACT OLANZAPINE ODT         | 02327597 | ALPRAZOLAM      | 02083418 | CIMETIDINE                   | 00603686 |
| ACT RISPERIDONE            | 02282585 | ALPRAZOLAM      | 02083426 | CIMETIDINE                   | 00600067 |
| ACT RISPERIDONE            | 02282593 | ALPRAZOLAM      | 02147572 | CIMETIDINE                   | 00584282 |
| ACT RISPERIDONE            | 02282607 | ALPRAZOLAM      | 02147580 | CIMETIDINE                   | 01916777 |
| ACT RISPERIDONE            | 02282615 | ALPRAZOLAM      | 02228858 | CIMETIDINE                   | 02227460 |
| ACT RISPERIDONE            | 02282623 | ALPRAZOLAM      | 02228866 | CIMETIDINE                   | 00865834 |
| ACT RISPERIDONE            | 02282631 | ALPRAZOLAM      | 02229813 | CIMETIDINE                   | 00749494 |
| AG-OLANZAPINE FC           | 02487608 | ALPRAZOLAM      | 02229814 | CIMETIDINE                   | 01916769 |
| AG-OLANZAPINE FC           | 02487616 | ALPRAZOLAM      | 02230744 | CIMETIDINE                   | 00663727 |
| AG-OLANZAPINE FC           | 02487624 | ALPRAZOLAM      | 02230745 | CIMETIDINE                   | 00618616 |
| AG-OLANZAPINE FC           | 02487632 | ALPRAZOLAM      | 02237264 | CIMETIDINE                   | 00653411 |

Appendix 1, as supplied by the authors. Appendix to: Welk B, Killin L, Reid JN, et al. Effect of electronic medication reconciliation at the time of hospital discharge on inappropriate medication use in the community: an interrupted time series analysis. *CMAJ Open* 2021. DOI:10.9778/cmajo.20210071. Copyright © 2021 The Author(s) or their employer(s). To receive this resource in an accessible format, please contact us at [cmajgroup@cmaj.ca](mailto:cmajgroup@cmaj.ca).

|                               |          |            |          |            |          |
|-------------------------------|----------|------------|----------|------------|----------|
| AG-OLANZAPINE FC              | 02487640 | ALPRAZOLAM | 02237265 | CIMETIDINE | 02229721 |
| AG-OLANZAPINE FC              | 02487659 | ALPRAZOLAM | 02237266 | CIMETIDINE | 00486876 |
| AG-OLANZAPINE ODT             | 02487667 | ALPRAZOLAM | 02237267 | CIMETIDINE | 00596469 |
| AG-OLANZAPINE ODT             | 02487675 | ALPRAZOLAM | 02242107 | CIMETIDINE | 00596477 |
| AG-OLANZAPINE ODT             | 02487683 | ALPRAZOLAM | 02242108 | CIMETIDINE | 00616230 |
| AG-OLANZAPINE ODT             | 02487691 | ALPRAZOLAM | 02243611 | CIMETIDINE | 00618691 |
| AG-RISPERIDONE                | 02369079 | ALPRAZOLAM | 02243612 | CIMETIDINE | 00618705 |
| AG-RISPERIDONE                | 02369087 | ALPRAZOLAM | 02248706 | CIMETIDINE | 00639893 |
| AG-RISPERIDONE                | 02369095 | ALPRAZOLAM | 02248707 | CIMETIDINE | 00639907 |
| AG-RISPERIDONE                | 02369117 | ALPRAZOLAM | 02287277 | CIMETIDINE | 00639915 |
| AG-RISPERIDONE                | 02369125 | ALPRAZOLAM | 02287315 | CIMETIDINE | 00644277 |
| AG-RISPERIDONE                | 02369133 | ALPRAZOLAM | 02287323 | CIMETIDINE | 00644285 |
| AMISULPRIDE                   | 09900065 | ALPRAZOLAM | 02287331 | CIMETIDINE | 00749454 |
| AMISULPRIDE                   | 92099811 | ALPRAZOLAM | 02346990 | CIMETIDINE | 00811610 |
| APO CHLORPROMAZINE            | 00312673 | ALPRAZOLAM | 02347008 | CIMETIDINE | 00811629 |
| APO CHLORPROMAZINE            | 00312681 | ALPRAZOLAM | 02349191 | CIMETIDINE | 00811637 |
| APO CHLORPROMAZINE            | 00312703 | ALPRAZOLAM | 02400146 | CIMETIDINE | 00901390 |
| APO HALOPERIDOL LIQ 2MG/ML    | 00587702 | ALPRAZOLAM | 02400154 | CIMETIDINE | 00916815 |
| APO HALOPERIDOL TAB 0.5MG     | 00396796 | ALPRAZOLAM | 02404877 | CIMETIDINE | 02227479 |
| APO HALOPERIDOL TAB 1MG       | 00396818 | ALPRAZOLAM | 02404885 | CIMETIDINE | 02231285 |
| APO-ARIPRAZOLE                | 02471086 | ALPRAZOLAM | 02404893 | CIMETIDINE | 02231287 |
| APO-ARIPRAZOLE                | 02471094 | ALPRAZOLAM | 02404907 | CIMETIDINE | 02231288 |
| APO-ARIPRAZOLE                | 02471108 | ALPRAZOLAM | 02417650 | CIMETIDINE | 02231290 |
| APO-ARIPRAZOLE                | 02471116 | ALPRAZOLAM | 02417669 | CIMETIDINE | 02231291 |
| APO-ARIPRAZOLE                | 02471124 | ALPRAZOLAM | 02248706 | CIMETIDINE | 02237010 |
| APO-ARIPRAZOLE                | 02471132 | ALPRAZOLAM | 02349191 | CIMETIDINE | 02237412 |
| APO-HALOPERIDOL LA INJECTABLE | 02242361 | ALPRAZOLAM | 02349205 | CIMETIDINE | 02237619 |
| APO-HALOPERIDOL LA INJECTABLE | 02242362 | ALPRAZOLAM | 02434601 | CIMETIDINE | 02238161 |
| APO-HALOPERIDOL TAB 10MG      | 00463698 | ALPRAZOLAM | 02434628 | CIMETIDINE | 02238257 |
| APO-HALOPERIDOL TAB 2MG       | 00396826 | ALPRAZOLAM | 02434636 | CIMETIDINE | 99101253 |
| APO-HALOPERIDOL TAB 5MG       | 00396834 | ALPRAZOLAM | 02434644 | CIMETIDINE | 99101285 |
| APO-LOXAPINE                  | 02237651 | ALPRAZOLAM | 02230074 | CIMETIDINE | 99101291 |
| APO-LOXAPINE                  | 02237652 | ALPRAZOLAM | 02230075 | CIMETIDINE | 99101301 |
| APO-LOXAPINE                  | 02237653 | ALPRAZOLAM | 02248707 | CIMETIDINE | 00487872 |
| APO-LOXAPINE                  | 02237654 | ALPRAZOLAM | 01908189 | CIMETIDINE | 00584215 |
| APO-OLANZAPINE                | 02281791 | ALPRAZOLAM | 01908170 | CIMETIDINE | 00600059 |
| APO-OLANZAPINE                | 02281805 | ALPRAZOLAM | 02397021 | CIMETIDINE | 00600067 |
| APO-OLANZAPINE                | 02281813 | ALPRAZOLAM | 02397048 | CIMETIDINE | 00749494 |
| APO-OLANZAPINE                | 02281821 | ALPRAZOLAM | 02397056 | CIMETIDINE | 00596469 |
| APO-OLANZAPINE                | 02281848 | ALPRAZOLAM | 02397064 | CIMETIDINE | 00596477 |
| APO-OLANZAPINE                | 02333015 | ALPRAZOLAM | 02400111 | CIMETIDINE | 00618691 |
| APO-OLANZAPINE ODT            | 02360616 | ALPRAZOLAM | 02400138 | CIMETIDINE | 00618705 |

Appendix 1, as supplied by the authors. Appendix to: Welk B, Killin L, Reid JN, et al. Effect of electronic medication reconciliation at the time of hospital discharge on inappropriate medication use in the community: an interrupted time series analysis. *CMAJ Open* 2021. DOI:10.9778/cmajo.20210071. Copyright © 2021 The Author(s) or their employer(s). To receive this resource in an accessible format, please contact us at [cmajgroup@cmaj.ca](mailto:cmajgroup@cmaj.ca).

|                    |          |            |          |                             |          |
|--------------------|----------|------------|----------|-----------------------------|----------|
| APO-OLANZAPINE ODT | 02360624 | ALPRAZOLAM | 02400146 | CIMETIDINE                  | 02231285 |
| APO-OLANZAPINE ODT | 02360632 | ALPRAZOLAM | 02400154 | CIMETIDINE                  | 02231287 |
| APO-OLANZAPINE ODT | 02360640 | ALPRAZOLAM | 02137534 | CIMETIDINE                  | 02231288 |
| APO-RISPERIDONE    | 02280396 | ALPRAZOLAM | 02137542 | CIMETIDINE                  | 02231290 |
| APO-RISPERIDONE    | 02282119 | ALPRAZOLAM | 02229813 | CIMETIDINE                  | 02231291 |
| APO-RISPERIDONE    | 02282127 | ALPRAZOLAM | 02229814 | CIMETIDINE                  | 02227436 |
| APO-RISPERIDONE    | 02282135 | ALPRAZOLAM | 02417634 | CIMETIDINE                  | 02227444 |
| APO-RISPERIDONE    | 02282143 | ALPRAZOLAM | 02417642 | CIMETIDINE                  | 02227452 |
| APO-RISPERIDONE    | 02282151 | ALPRAZOLAM | 02417650 | CIMETIDINE                  | 02227460 |
| APO-RISPERIDONE    | 02282178 | ALPRAZOLAM | 02417669 | CIMETIDINE                  | 02227479 |
| ARIPIPIRAZOLE      | 02473674 | ALPRAZOLAM | 02346990 | CIMETIDINE                  | 02229717 |
| ARIPIPIRAZOLE      | 02322390 | ALPRAZOLAM | 02347008 | CIMETIDINE                  | 02229718 |
| ARIPIPIRAZOLE      | 02466651 | ALPRAZOLAM | 00677477 | CIMETIDINE                  | 02229719 |
| ARIPIPIRAZOLE      | 02460041 | ALPRAZOLAM | 00677485 | CIMETIDINE                  | 02229720 |
| ARIPIPIRAZOLE      | 02471108 | ALPRAZOLAM | 02404877 | CIMETIDINE                  | 02229721 |
| ARIPIPIRAZOLE      | 02473682 | ALPRAZOLAM | 02404885 | CIMETIDINE                  | 02237619 |
| ARIPIPIRAZOLE      | 02322404 | ALPRAZOLAM | 02404893 | CIMETIDINE                  | 02237010 |
| ARIPIPIRAZOLE      | 02460068 | ALPRAZOLAM | 02404907 | CIMETIDINE                  | 02238161 |
| ARIPIPIRAZOLE      | 02471116 | ALPRAZOLAM | 02242107 | CIMETIDINE                  | 00582409 |
| ARIPIPIRAZOLE      | 02473690 | ALPRAZOLAM | 02242108 | CIMETIDINE                  | 00582417 |
| ARIPIPIRAZOLE      | 02471124 | ALPRAZOLAM | 01913484 | CIMETIDINE                  | 00603678 |
| ARIPIPIRAZOLE      | 02466686 | ALPRAZOLAM | 01913492 | CIMETIDINE                  | 00603686 |
| ARIPIPIRAZOLE      | 02322412 | BROMAZEPAM | 00682314 | CIMETIDINE                  | 00663727 |
| ARIPIPIRAZOLE      | 02460076 | BROMAZEPAM | 02177153 | CIMETIDINE                  | 00865796 |
| ARIPIPIRAZOLE      | 02322374 | BROMAZEPAM | 02171856 | CIMETIDINE                  | 00865818 |
| ARIPIPIRAZOLE      | 02466635 | BROMAZEPAM | 02192705 | CIMETIDINE                  | 00865826 |
| ARIPIPIRAZOLE      | 02473658 | BROMAZEPAM | 02167808 | CIMETIDINE                  | 00865834 |
| ARIPIPIRAZOLE      | 02460025 | BROMAZEPAM | 02167816 | CIMETIDINE                  | 00546232 |
| ARIPIPIRAZOLE      | 02471086 | BROMAZEPAM | 02171864 | CIMETIDINE                  | 00546240 |
| ARIPIPIRAZOLE      | 02420864 | BROMAZEPAM | 02177161 | CIMETIDINE                  | 00568449 |
| ARIPIPIRAZOLE      | 02471132 | BROMAZEPAM | 02192713 | CIMETIDINE                  | 00584282 |
| ARIPIPIRAZOLE      | 02466694 | BROMAZEPAM | 00518123 | CIMETIDINE                  | 00618616 |
| ARIPIPIRAZOLE      | 02322455 | BROMAZEPAM | 02230584 | CIMETIDINE                  | 01916815 |
| ARIPIPIRAZOLE      | 02473704 | BROMAZEPAM | 02230585 | CIMETIDINE                  | 01916785 |
| ARIPIPIRAZOLE      | 02420872 | BROMAZEPAM | 00518131 | CIMETIDINE                  | 01916777 |
| ARIPIPIRAZOLE      | 02473666 | BROMAZEPAM | 02177188 | CIMETIDINE (CIMETIDINE HCL) | 02243085 |
| ARIPIPIRAZOLE      | 02466643 | BROMAZEPAM | 02167824 | CIMETIDINE (CIMETIDINE HCL) | 02209063 |
| ARIPIPIRAZOLE      | 02471094 | BROMAZEPAM | 02171872 | CIMETIDINE (CIMETIDINE HCL) | 01916807 |
| ARIPIPIRAZOLE      | 02322382 | BROMAZEPAM | 02192721 | CIMETIDINE (CIMETIDINE HCL) | 00397482 |
| ARIPIPIRAZOLE      | 02460033 | BROMAZEPAM | 02220512 | CIMETIDINE (CIMETIDINE HCL) | 01916750 |
| ARIPIPIRAZOLE      | 00900425 | BROMAZEPAM | 02220520 | CIMETIDINE HCL              | 02243085 |
| ARIPIPIRAZOLE      | 00965529 | BROMAZEPAM | 02220539 | CIMETIDINE HCL              | 00397482 |

Appendix 1, as supplied by the authors. Appendix to: Welk B, Killin L, Reid JN, et al. Effect of electronic medication reconciliation at the time of hospital discharge on inappropriate medication use in the community: an interrupted time series analysis. *CMAJ Open* 2021. DOI:10.9778/cmajo.20210071. Copyright © 2021 The Author(s) or their employer(s). To receive this resource in an accessible format, please contact us at [cmajgroup@cmaj.ca](mailto:cmajgroup@cmaj.ca).

|                               |          |                  |          |                                                  |          |
|-------------------------------|----------|------------------|----------|--------------------------------------------------|----------|
| ARIPIPRAZOLE                  | 02460084 | BROMAZEPAM       | 02228874 | CIMETIDINE HCL                                   | 01916750 |
| ARIPIPRAZOLE                  | 02464144 | BROMAZEPAM       | 02228882 | CIMETIDINE HCL                                   | 00397490 |
| ARIPIPRAZOLE                  | 02464152 | BROMAZEPAM       | 02228890 | CIMETIDINE HCL                                   | 00527076 |
| ARIPIPRAZOLE                  | 02464160 | BROMAZEPAM       | 02230039 | CIMETIDINE HCL                                   | 01916807 |
| ARIPIPRAZOLE                  | 02464179 | BROMAZEPAM       | 02230040 | CIMETIDINE HCL                                   | 02209063 |
| ARIPIPRAZOLE                  | 02464187 | BROMAZEPAM       | 02230041 | CIMETIDINE HCL                                   | 02240385 |
| ARIPIPRAZOLE                  | 02464195 | BROMAZEPAM       | 02230666 | CIMETIDINE HCL                                   | 01927280 |
| ARIPIPRAZOLE                  | 02466678 | BROMAZEPAM       | 02230667 | DEXLANSOPRAZOLE                                  | 02354696 |
| ARIPIPRAZOLE                  | 05751321 | BROMAZEPAM       | 02230668 | DEXLANSOPRAZOLE                                  | 02354950 |
| ARIPIPRAZOLE                  | 06612408 | BROMAZEPAM       | 02232556 | DEXLANSOPRAZOLE                                  | 02354969 |
| ARIPIPRAZOLE                  | 22123272 | BROMAZEPAM       | 02232558 | ESOMEPRAZOLE (ESOMEPRAZOLE MAGNESIUM DIHYDRATE)  | 02423855 |
| ARIPIPRAZOLE                  | 66124649 | BROMAZEPAM       | 02242152 | ESOMEPRAZOLE (ESOMEPRAZOLE MAGNESIUM DIHYDRATE)  | 02423863 |
| ARIPIPRAZOLE                  | 02488000 | BROMAZEPAM       | 02242153 | ESOMEPRAZOLE (ESOMEPRAZOLE MAGNESIUM DIHYDRATE)  | 02417480 |
| ARIPIPRAZOLE                  | 02488019 | BROMAZEPAM       | 99101489 | ESOMEPRAZOLE (ESOMEPRAZOLE MAGNESIUM DIHYDRATE)  | 02417499 |
| ARIPIPRAZOLE                  | 02488027 | BROMAZEPAM       | 99101490 | ESOMEPRAZOLE (ESOMEPRAZOLE MAGNESIUM DIHYDRATE)  | 02384329 |
| ARIPIPRAZOLE                  | 02488035 | BROMAZEPAM       | 02167808 | ESOMEPRAZOLE (ESOMEPRAZOLE MAGNESIUM DIHYDRATE)  | 02384337 |
| ARIPIPRAZOLE                  | 02488043 | BROMAZEPAM       | 02167816 | ESOMEPRAZOLE (ESOMEPRAZOLE MAGNESIUM DIHYDRATE)  | 02379163 |
| ARIPIPRAZOLE                  | 02488051 | BROMAZEPAM       | 02167824 | ESOMEPRAZOLE (ESOMEPRAZOLE MAGNESIUM DIHYDRATE)  | 02379171 |
| ASENAPINE                     | 02374811 | BROMAZEPAM       | 02177153 | ESOMEPRAZOLE (ESOMEPRAZOLE MAGNESIUM DIHYDRATE)  | 02386216 |
| ASENAPINE                     | 02374803 | BROMAZEPAM       | 02177161 | ESOMEPRAZOLE (ESOMEPRAZOLE MAGNESIUM DIHYDRATE)  | 02386224 |
| ASENAPINE (ASENAPINE MALEATE) | 02374803 | BROMAZEPAM       | 02177188 | ESOMEPRAZOLE (ESOMEPRAZOLE MAGNESIUM DIHYDRATE)  | 02460920 |
| ASENAPINE (ASENAPINE MALEATE) | 02374811 | BROMAZEPAM       | 02220512 | ESOMEPRAZOLE (ESOMEPRAZOLE MAGNESIUM DIHYDRATE)  | 02460939 |
| AURO-ARIPIPRAZOLE             | 02460025 | BROMAZEPAM       | 02220520 | ESOMEPRAZOLE (ESOMEPRAZOLE MAGNESIUM TRIHYDRATE) | 02449587 |
| AURO-ARIPIPRAZOLE             | 02460033 | BROMAZEPAM       | 02220539 | ESOMEPRAZOLE (ESOMEPRAZOLE MAGNESIUM TRIHYDRATE) | 02449595 |
| AURO-ARIPIPRAZOLE             | 02460041 | BROMAZEPAM       | 02192713 | ESOMEPRAZOLE (ESOMEPRAZOLE MAGNESIUM TRIHYDRATE) | 02479419 |
| AURO-ARIPIPRAZOLE             | 02460068 | BROMAZEPAM       | 02192721 | ESOMEPRAZOLE (ESOMEPRAZOLE MAGNESIUM TRIHYDRATE) | 02479427 |
| AURO-ARIPIPRAZOLE             | 02460076 | BROMAZEPAM       | 02192705 | ESOMEPRAZOLE (ESOMEPRAZOLE MAGNESIUM TRIHYDRATE) | 02383039 |
| AURO-ARIPIPRAZOLE             | 02460084 | BROMAZEPAM       | 02171856 | ESOMEPRAZOLE (ESOMEPRAZOLE MAGNESIUM TRIHYDRATE) | 02383047 |
| AURO-CLOZAPINE                | 02455161 | BROMAZEPAM       | 02171864 | ESOMEPRAZOLE (ESOMEPRAZOLE MAGNESIUM TRIHYDRATE) | 02300524 |
| AURO-CLOZAPINE                | 02455188 | BROMAZEPAM       | 02171872 | ESOMEPRAZOLE (ESOMEPRAZOLE MAGNESIUM TRIHYDRATE) | 02244521 |
| AURO-CLOZAPINE                | 02455196 | BROMAZEPAM       | 02232556 | ESOMEPRAZOLE (ESOMEPRAZOLE MAGNESIUM TRIHYDRATE) | 02244522 |
| AURO-CLOZAPINE                | 02455218 | BROMAZEPAM       | 02232558 | ESOMEPRAZOLE (ESOMEPRAZOLE MAGNESIUM TRIHYDRATE) | 02444712 |
| AURO-OLANZAPINE ODT           | 02448726 | BROMAZEPAM       | 02242152 | ESOMEPRAZOLE (ESOMEPRAZOLE MAGNESIUM)            | 02339099 |
| AURO-OLANZAPINE ODT           | 02448734 | BROMAZEPAM       | 02242153 | ESOMEPRAZOLE (ESOMEPRAZOLE MAGNESIUM)            | 02339102 |
| AURO-OLANZAPINE ODT           | 02448742 | BROMAZEPAM       | 02230584 | ESOMEPRAZOLE (ESOMEPRAZOLE MAGNESIUM)            | 02394839 |
| AURO-OLANZAPINE ODT           | 02448750 | BROMAZEPAM       | 02230585 | ESOMEPRAZOLE (ESOMEPRAZOLE MAGNESIUM)            | 02394847 |
| AVA-OLANZAPINE                | 02373432 | CHLORDIAZEPOXIDE | 00522988 | ESOMEPRAZOLE (ESOMEPRAZOLE MAGNESIUM)            | 02431173 |
| AVA-OLANZAPINE                | 02373440 | CHLORDIAZEPOXIDE | 00522996 | ESOMEPRAZOLE (ESOMEPRAZOLE MAGNESIUM)            | 02438461 |
| AVA-OLANZAPINE                | 02373459 | CHLORDIAZEPOXIDE | 00522724 | ESOMEPRAZOLE (ESOMEPRAZOLE MAGNESIUM)            | 02438488 |
| AVA-OLANZAPINE                | 02373467 | CHLORDIAZEPOXIDE | 00016764 | ESOMEPRAZOLE (ESOMEPRAZOLE MAGNESIUM)            | 02442493 |
| AVA-OLANZAPINE                | 02373475 | CHLORDIAZEPOXIDE | 00430927 | ESOMEPRAZOLE (ESOMEPRAZOLE MAGNESIUM)            | 02442507 |
| AVA-RISPERIDONE               | 02364344 | CHLORDIAZEPOXIDE | 00430935 | ESOMEPRAZOLE (ESOMEPRAZOLE MAGNESIUM)            | 02414392 |

Appendix 1, as supplied by the authors. Appendix to: Welk B, Killin L, Reid JN, et al. Effect of electronic medication reconciliation at the time of hospital discharge on inappropriate medication use in the community: an interrupted time series analysis. *CMAJ Open* 2021. DOI:10.9778/cmajo.20210071. Copyright © 2021 The Author(s) or their employer(s). To receive this resource in an accessible format, please contact us at [cmajgroup@cmaj.ca](mailto:cmajgroup@cmaj.ca).

|                    |          |                                          |          |                                       |          |
|--------------------|----------|------------------------------------------|----------|---------------------------------------|----------|
| AVA-RISPERIDONE    | 02367173 | CHLORDIAZEPOXIDE                         | 00448737 | ESOMEPRAZOLE (ESOMEPRAZOLE MAGNESIUM) | 02414406 |
| AVA-RISPERIDONE    | 02367181 | CHLORDIAZEPOXIDE                         | 00903688 | ESOMEPRAZOLE (ESOMEPRAZOLE MAGNESIUM) | 02423979 |
| AVA-RISPERIDONE    | 02367203 | CHLORDIAZEPOXIDE HCL                     | 00013471 | ESOMEPRAZOLE (ESOMEPRAZOLE MAGNESIUM) | 02423987 |
| AVA-RISPERIDONE    | 02367211 | CHLORDIAZEPOXIDE HCL                     | 00020923 | ESOMEPRAZOLE MAGNESIUM                | 02300524 |
| AVA-RISPERIDONE    | 02367238 | CHLORDIAZEPOXIDE HCL                     | 00012637 | ESOMEPRAZOLE MAGNESIUM                | 02244522 |
| AVA-RISPERIDONE    | 02367246 | CHLORDIAZEPOXIDE HCL                     | 00398411 | ESOMEPRAZOLE MAGNESIUM                | 02244521 |
| BUPROPION HCL      | 00001595 | CHLORDIAZEPOXIDE HCL                     | 00012645 | ESOMEPRAZOLE MAGNESIUM                | 02339099 |
| BUPROPION HCL      | 22602390 | CHLORDIAZEPOXIDE HCL                     | 00020931 | ESOMEPRAZOLE MAGNESIUM                | 02339102 |
| BUPROPION HCL SR   | 02385694 | CHLORDIAZEPOXIDE HCL                     | 00398438 | ESOMEPRAZOLE MAGNESIUM                | 02379171 |
| BUPROPION HCL XL   | 02383187 | CHLORDIAZEPOXIDE HCL                     | 00013498 | ESOMEPRAZOLE MAGNESIUM                | 02383039 |
| BUPROPION HCL XL   | 02383195 | CHLORDIAZEPOXIDE HCL                     | 00295051 | ESOMEPRAZOLE MAGNESIUM                | 02383047 |
| CHLORMEZANONE      | 00033626 | CHLORDIAZEPOXIDE HCL                     | 00398403 | ESOMEPRAZOLE MAGNESIUM                | 02394839 |
| CHLORPROMAZINE     | 01930001 | CHLORDIAZEPOXIDE HCL                     | 00013463 | ESOMEPRAZOLE MAGNESIUM                | 02394847 |
| CHLORPROMAZINE     | 00025283 | CHLORDIAZEPOXIDE HCL                     | 00020915 | ESOMEPRAZOLE MAGNESIUM                | 02423855 |
| CHLORPROMAZINE     | 00025186 | CHLORDIAZEPOXIDE HCL                     | 00012629 | ESOMEPRAZOLE MAGNESIUM                | 02423863 |
| CHLORPROMAZINE     | 00025151 | CHLORDIAZEPOXIDE HCL                     | 00012815 | ESOMEPRAZOLE MAGNESIUM                | 02423979 |
| CHLORPROMAZINE     | 01929968 | CHLORDIAZEPOXIDE HCL                     | 00016756 | ESOMEPRAZOLE MAGNESIUM                | 02423987 |
| CHLORPROMAZINE     | 00025275 | CHLORDIAZEPOXIDE HCL                     | 00022020 | ESOMEPRAZOLE MAGNESIUM                | 02431173 |
| CHLORPROMAZINE HCL | 01929933 | CHLORDIAZEPOXIDE HCL                     | 00134325 | ESOMEPRAZOLE MAGNESIUM                | 02442493 |
| CHLORPROMAZINE HCL | 00232831 | CHLORDIAZEPOXIDE HCL                     | 00134333 | ESOMEPRAZOLE MAGNESIUM                | 02442507 |
| CHLORPROMAZINE HCL | 00025496 | CHLORDIAZEPOXIDE HCL                     | 00156590 | ESOMEPRAZOLE MAGNESIUM                | 02444712 |
| CHLORPROMAZINE HCL | 00025178 | CHLORDIAZEPOXIDE HCL                     | 00210064 | ESOMEPRAZOLE MAGNESIUM                | 02460920 |
| CHLORPROMAZINE HCL | 01929976 | CHLORDIAZEPOXIDE HCL                     | 00235873 | ESOMEPRAZOLE MAGNESIUM                | 02460939 |
| CHLORPROMAZINE HCL | 01929909 | CHLORDIAZEPOXIDE HCL                     | 00251259 | ESOMEPRAZOLE MAGNESIUM                | 82244522 |
| CHLORPROMAZINE HCL | 00025453 | CHLORDIAZEPOXIDE HCL                     | 00251267 | EXTEMPORANEOUS MIXTURE                | 99503002 |
| CHLORPROMAZINE HCL | 00232157 | CHLORDIAZEPOXIDE HCL                     | 00267090 | FAMOTIDINE                            | 00728128 |
| CHLORPROMAZINE HCL | 00025518 | CHLORDIAZEPOXIDE HCL                     | 00301558 | FAMOTIDINE                            | 01953842 |
| CHLORPROMAZINE HCL | 01929941 | CHLORDIAZEPOXIDE HCL                     | 00314471 | FAMOTIDINE                            | 02024195 |
| CHLORPROMAZINE HCL | 00580988 | CHLORDIAZEPOXIDE HCL                     | 00314498 | FAMOTIDINE                            | 02022133 |
| CHLORPROMAZINE HCL | 00025461 | CHLORDIAZEPOXIDE HCL                     | 00314528 | FAMOTIDINE                            | 02196018 |
| CHLORPROMAZINE HCL | 00232823 | CHLORDIAZEPOXIDE HCL                     | 00324418 | FAMOTIDINE                            | 00710121 |
| CHLORPROMAZINE HCL | 01929917 | CHLORDIAZEPOXIDE HCL                     | 00363596 | FAMOTIDINE                            | 02237148 |
| CHLORPROMAZINE HCL | 01929992 | CHLORDIAZEPOXIDE HCL                     | 00379913 | FAMOTIDINE                            | 02240622 |
| CHLORPROMAZINE HCL | 01929984 | CHLORDIAZEPOXIDE HCL                     | 00434426 | FAMOTIDINE                            | 02242327 |
| CHLORPROMAZINE HCL | 00163953 | CHLORDIAZEPOXIDE HCL                     | 00440183 | FAMOTIDINE                            | 02351102 |
| CHLORPROMAZINE HCL | 00025488 | CHLORDIAZEPOXIDE HCL                     | 00451479 | FAMOTIDINE                            | 02351110 |
| CHLORPROMAZINE HCL | 00232807 | CHLORDIAZEPOXIDE HCL                     | 00451487 | FAMOTIDINE                            | 02237149 |
| CHLORPROMAZINE HCL | 01929925 | CHLORDIAZEPOXIDE HCL                     | 00451495 | FAMOTIDINE                            | 02242328 |
| CHLORPROMAZINE HCL | 00016993 | CHLORDIAZEPOXIDE HCL                     | 00502626 | FAMOTIDINE                            | 02240623 |
| CHLORPROMAZINE HCL | 00017000 | CHLORDIAZEPOXIDE HCL                     | 99101299 | FAMOTIDINE                            | 00710113 |
| CHLORPROMAZINE HCL | 00017019 | CHLORDIAZEPOXIDE HCL                     | 99101354 | FAMOTIDINE                            | 02022141 |
| CHLORPROMAZINE HCL | 00017027 | CHLORDIAZEPOXIDE HCL & CLIDINIUM BROMIDE | 00618454 | FAMOTIDINE                            | 02024209 |

Appendix 1, as supplied by the authors. Appendix to: Welk B, Killin L, Reid JN, et al. Effect of electronic medication reconciliation at the time of hospital discharge on inappropriate medication use in the community: an interrupted time series analysis. *CMAJ Open* 2021. DOI:10.9778/cmajo.20210071. Copyright © 2021 The Author(s) or their employer(s). To receive this resource in an accessible format, please contact us at [cmajgroup@cmaj.ca](mailto:cmajgroup@cmaj.ca).

|                                    |          |                                      |          |            |          |
|------------------------------------|----------|--------------------------------------|----------|------------|----------|
| CHLORPROMAZINE HCL                 | 00021318 | CHLORDIAZEPOXIDE HCL & CLIDINIUM HCL | 00115630 | FAMOTIDINE | 01953834 |
| CHLORPROMAZINE HCL                 | 00021326 | CHLORDIAZEPOXIDE HCL & CLIDINIUM HCL | 00391077 | FAMOTIDINE | 02196026 |
| CHLORPROMAZINE HCL                 | 00021334 | CHLORDIAZEPOXIDE HCL & CLIDINIUM HCL | 00636223 | FAMOTIDINE | 00728101 |
| CHLORPROMAZINE HCL                 | 00021342 | CHLORDIAZEPOXIDE HCL & CLIDINIUM HCL | 00807516 | FAMOTIDINE | 01953824 |
| CHLORPROMAZINE HCL                 | 00131725 | CHLORDIAZEPOXIDE HCL                 | 00522724 | FAMOTIDINE | 02100541 |
| CHLORPROMAZINE HCL                 | 00163988 | CHLORDIAZEPOXIDE HCL                 | 00522988 | FAMOTIDINE | 02100568 |
| CHLORPROMAZINE HCL                 | 00164003 | CHLORDIAZEPOXIDE HCL                 | 00522996 | FAMOTIDINE | 02185911 |
| CHLORPROMAZINE HCL                 | 00209902 | CHLORDIAZEPOXIDE HCL                 | 00156590 | FAMOTIDINE | 02185938 |
| CHLORPROMAZINE HCL                 | 00209910 | CHLORDIAZEPOXIDE HCL                 | 00363596 | FAMOTIDINE | 02229995 |
| CHLORPROMAZINE HCL                 | 00210684 | CHLORDIAZEPOXIDE HCL                 | 00618454 | FAMOTIDINE | 02229996 |
| CHLORPROMAZINE HCL                 | 00249394 | CHLORDIAZEPOXIDE HCL                 | 00448737 | FAMOTIDINE | 02231104 |
| CHLORPROMAZINE HCL                 | 00271101 | CHLORDIAZEPOXIDE HCL                 | 00430935 | FAMOTIDINE | 02231119 |
| CHLORPROMAZINE HCL                 | 00271128 | CHLORDIAZEPOXIDE HCL                 | 00434426 | FAMOTIDINE | 02231400 |
| CHLORPROMAZINE HCL                 | 00295086 | CHLORDIAZEPOXIDE HCL                 | 00235873 | FAMOTIDINE | 02231567 |
| CHLORPROMAZINE HCL                 | 00312673 | CHLORDIAZEPOXIDE HCL                 | 00267090 | FAMOTIDINE | 02232293 |
| CHLORPROMAZINE HCL                 | 00312681 | CHLORDIAZEPOXIDE HCL                 | 00295051 | FAMOTIDINE | 02235133 |
| CHLORPROMAZINE HCL                 | 00312703 | CHLORDIAZEPOXIDE HCL                 | 00391077 | FAMOTIDINE | 02237004 |
| CHLORPROMAZINE HCL                 | 00324299 | CHLORDIAZEPOXIDE HCL                 | 00115630 | FAMOTIDINE | 02237150 |
| CHLORPROMAZINE HCL                 | 00324302 | CHLORDIAZEPOXIDE HCL                 | 00134333 | FAMOTIDINE | 02237223 |
| CHLORPROMAZINE HCL                 | 00386588 | CHLORDIAZEPOXIDE HCL                 | 00134325 | FAMOTIDINE | 02238212 |
| CHLORPROMAZINE HCL                 | 00386596 | CHLORDIAZEPOXIDE HCL                 | 00020923 | FAMOTIDINE | 02238342 |
| CHLORPROMAZINE HCL                 | 00386618 | CHLORDIAZEPOXIDE HCL                 | 00020931 | FAMOTIDINE | 02238343 |
| CHLORPROMAZINE HCL                 | 00430943 | CHLORDIAZEPOXIDE HCL                 | 00020915 | FAMOTIDINE | 02240414 |
| CHLORPROMAZINE HCL                 | 00430951 | CHLORDIAZEPOXIDE HCL                 | 02239110 | FAMOTIDINE | 02241322 |
| CHLORPROMAZINE HCL                 | 00430978 | CHLORDIAZEPOXIDE HCL                 | 00636223 | FAMOTIDINE | 02241372 |
| CHLORPROMAZINE HCL                 | 00478334 | CLOBAZAM                             | 00846392 | FAMOTIDINE | 02241373 |
| CHLORPROMAZINE HCL                 | 00502456 | CLOBAZAM                             | 01989634 | FAMOTIDINE | 02242154 |
| CHLORPROMAZINE HCL                 | 00502464 | CLOBAZAM                             | 02221799 | FAMOTIDINE | 02242155 |
| CHLORPROMAZINE HCL                 | 00523097 | CLOBAZAM                             | 02244474 | FAMOTIDINE | 02242326 |
| CHLORPROMAZINE HCL                 | 00627615 | CLOBAZAM                             | 02238334 | FAMOTIDINE | 02242357 |
| CHLORPROMAZINE HCL                 | 00690805 | CLOBAZAM                             | 02238797 | FAMOTIDINE | 02243053 |
| CHLORPROMAZINE HCL                 | 00743518 | CLOBAZAM                             | 02244638 | FAMOTIDINE | 02244133 |
| CHLORPROMAZINE HCL                 | 00774383 | CLOBAZAM                             | 00903405 | FAMOTIDINE | 02244795 |
| CHLORPROMAZINE HCL                 | 00903042 | CLOBAZAM                             | 02247230 | FAMOTIDINE | 02244796 |
| CHLORPROMAZINE HCL                 | 01933272 | CLOBAZAM                             | 02248454 | FAMOTIDINE | 02244888 |
| CHLORPROMAZINE HCL                 | 01985434 | CLOBAZAM                             | 02347598 | FAMOTIDINE | 02244998 |
| CHLORPROMAZINE HCL                 | 01985442 | CLOBAZAM                             | 09851844 | FAMOTIDINE | 02246364 |
| CHLORPROMAZINE HCL                 | 01985450 | CLOBAZAM                             | 09851968 | FAMOTIDINE | 02247735 |
| CHLORPROMAZINE HCL INJ 25MG/ML USP | 01933272 | CLOBAZAM                             | 22123230 | FAMOTIDINE | 02247745 |
| CHLORPROMAZINE HCL INJ 27.9MG/ML   | 00627615 | CLOBAZAM                             | 99101484 | FAMOTIDINE | 02247799 |
| CHLORPROMAZINE HCL INJ USP         | 02382016 | CLOBAZAM                             | 02244638 | FAMOTIDINE | 02247800 |
| CHLORPROMAZINE HCL INJECTION       | 00743518 | CLOBAZAM                             | 02248454 | FAMOTIDINE | 02248222 |

Appendix 1, as supplied by the authors. Appendix to: Welk B, Killin L, Reid JN, et al. Effect of electronic medication reconciliation at the time of hospital discharge on inappropriate medication use in the community: an interrupted time series analysis. *CMAJ Open* 2021. DOI:10.9778/cmajo.20210071. Copyright © 2021 The Author(s) or their employer(s). To receive this resource in an accessible format, please contact us at [cmajgroup@cmaj.ca](mailto:cmajgroup@cmaj.ca).

|                                   |          |            |          |            |          |
|-----------------------------------|----------|------------|----------|------------|----------|
| CHLORPROMAZINE TAB 25MG           | 00430943 | CLOBAZAM   | 02247230 | FAMOTIDINE | 02248223 |
| CHLORPROMAZINE TABLETS B.P. 100MG | 01985442 | CLOBAZAM   | 02347598 | FAMOTIDINE | 02252902 |
| CHLORPROMAZINE TABLETS B.P. 25MG  | 01985434 | CLOBAZAM   | 02244474 | FAMOTIDINE | 02252910 |
| CHLORPROMAZINE TABLETS B.P. 50MG  | 01985450 | CLOBAZAM   | 02238797 | FAMOTIDINE | 02257645 |
| CHLORPROTHIXENE                   | 00013234 | CLOBAZAM   | 02238334 | FAMOTIDINE | 02257653 |
| CHLORPROTHIXENE                   | 00013242 | CLONAZEPAM | 09852395 | FAMOTIDINE | 02259443 |
| CHLORPROTHIXENE                   | 66124036 | CLONAZEPAM | 02345676 | FAMOTIDINE | 02259451 |
| CHLORPROTHIXENE                   | 66124101 | CLONAZEPAM | 02230950 | FAMOTIDINE | 02273357 |
| CLOZAPINE                         | 00894745 | CLONAZEPAM | 02233960 | FAMOTIDINE | 02296098 |
| CLOZAPINE                         | 02247244 | CLONAZEPAM | 02239024 | FAMOTIDINE | 02347636 |
| CLOZAPINE                         | 02248034 | CLONAZEPAM | 02230366 | FAMOTIDINE | 02347644 |
| CLOZAPINE                         | 02247243 | CLONAZEPAM | 02236948 | FAMOTIDINE | 02373920 |
| CLOZAPINE                         | 00894737 | CLONAZEPAM | 02270641 | FAMOTIDINE | 02373939 |
| CLOZAPINE                         | 02240668 | CLONAZEPAM | 00382825 | FAMOTIDINE | 99304725 |
| CLOZAPINE                         | 02240669 | CLONAZEPAM | 02048701 | FAMOTIDINE | 02231119 |
| CLOZAPINE                         | 02247798 | CLONAZEPAM | 02173344 | FAMOTIDINE | 02244888 |
| CLOZAPINE                         | 02247805 | CLONAZEPAM | 02103656 | FAMOTIDINE | 02244998 |
| CLOZAPINE                         | 02248035 | CLONAZEPAM | 02145227 | FAMOTIDINE | 01953842 |
| CLOZAPINE                         | 02305003 | CLONAZEPAM | 02207818 | FAMOTIDINE | 01953834 |
| CLOZAPINE                         | 02305011 | CLONAZEPAM | 02177889 | FAMOTIDINE | 02257645 |
| CLOZAPINE                         | 02458748 | CLONAZEPAM | 02048736 | FAMOTIDINE | 02257653 |
| CLOZAPINE                         | 02458756 | CLONAZEPAM | 02177897 | FAMOTIDINE | 02238212 |
| CLOZAPINE                         | 22123233 | CLONAZEPAM | 02103737 | FAMOTIDINE | 02244133 |
| CLOZAPINE                         | 22472440 | CLONAZEPAM | 02173352 | FAMOTIDINE | 02246364 |
| CLOZAPINE                         | 90894737 | CLONAZEPAM | 02145243 | FAMOTIDINE | 02383071 |
| CLOZAPINE                         | 90894745 | CLONAZEPAM | 00382841 | FAMOTIDINE | 02383098 |
| CLOZAPINE TABLETS                 | 02470020 | CLONAZEPAM | 02270676 | FAMOTIDINE | 02247799 |
| CLOZAPINE TABLETS                 | 02470039 | CLONAZEPAM | 02230951 | FAMOTIDINE | 02247800 |
| DOM-LOXAPINE TABLETS 10MG         | 02239919 | CLONAZEPAM | 02230369 | FAMOTIDINE | 02247745 |
| DOM-LOXAPINE TABLETS 25MG         | 02239920 | CLONAZEPAM | 02233985 | FAMOTIDINE | 02247735 |
| DOM-LOXAPINE TABLETS 50MG         | 02239921 | CLONAZEPAM | 02303337 | FAMOTIDINE | 02248222 |
| DOM-LOXAPINE TABLETS 5MG          | 02239918 | CLONAZEPAM | 02239025 | FAMOTIDINE | 02248223 |
| DOM-OLANZAPINE                    | 02307324 | CLONAZEPAM | 00903559 | FAMOTIDINE | 02351102 |
| DOM-OLANZAPINE                    | 02307332 | CLONAZEPAM | 00907197 | FAMOTIDINE | 02351110 |
| DOM-OLANZAPINE                    | 02307340 | CLONAZEPAM | 00907200 | FAMOTIDINE | 02241372 |
| DOM-OLANZAPINE                    | 02307359 | CLONAZEPAM | 02010365 | FAMOTIDINE | 02241373 |
| DOM-OLANZAPINE                    | 02307367 | CLONAZEPAM | 02048728 | FAMOTIDINE | 02196018 |
| DOM-OLANZAPINE ODT                | 02307375 | CLONAZEPAM | 02078736 | FAMOTIDINE | 02196026 |
| DOM-OLANZAPINE ODT                | 02307383 | CLONAZEPAM | 02130998 | FAMOTIDINE | 02347636 |
| DOM-OLANZAPINE ODT                | 02307391 | CLONAZEPAM | 02131005 | FAMOTIDINE | 02347644 |
| DOM-RISPERIDONE                   | 02278421 | CLONAZEPAM | 02131013 | FAMOTIDINE | 02024195 |
| DOM-RISPERIDONE                   | 02278448 | CLONAZEPAM | 02145235 | FAMOTIDINE | 02024209 |

Appendix 1, as supplied by the authors. Appendix to: Welk B, Killin L, Reid JN, et al. Effect of electronic medication reconciliation at the time of hospital discharge on inappropriate medication use in the community: an interrupted time series analysis. *CMAJ Open* 2021. DOI:10.9778/cmajo.20210071. Copyright © 2021 The Author(s) or their employer(s). To receive this resource in an accessible format, please contact us at [cmajgroup@cmaj.ca](mailto:cmajgroup@cmaj.ca).



|                                    |          |            |          |              |          |
|------------------------------------|----------|------------|----------|--------------|----------|
| DOM-RISPERIDONE                    | 02278456 | CLONAZEPAM | 02179660 | FAMOTIDINE   | 02238342 |
| DOM-RISPERIDONE                    | 02278464 | CLONAZEPAM | 02220598 | FAMOTIDINE   | 02238343 |
| DOM-RISPERIDONE                    | 02278472 | CLONAZEPAM | 02220601 | FAMOTIDINE   | 02242327 |
| DOM-RISPERIDONE                    | 02278480 | CLONAZEPAM | 02224100 | FAMOTIDINE   | 02242328 |
| DOM-RISPERIDONE                    | 02309572 | CLONAZEPAM | 02230368 | FAMOTIDINE   | 02240622 |
| DOM-RISPERIDONE ODT                | 02294478 | CLONAZEPAM | 02233982 | FAMOTIDINE   | 02240623 |
| DOM-RISPERIDONE ODT                | 02294486 | CLONAZEPAM | 02235370 | FAMOTIDINE   | 02242154 |
| DOM-RISPERIDONE ODT                | 02294494 | CLONAZEPAM | 02235379 | FAMOTIDINE   | 02242155 |
| DROPERIDOL                         | 00132446 | CLONAZEPAM | 02236947 | FAMOTIDINE   | 02022133 |
| DROPERIDOL                         | 00554251 | CLONAZEPAM | 02237277 | FAMOTIDINE   | 02022141 |
| DROPERIDOL                         | 02157832 | CLONAZEPAM | 02237278 | LANSOPRAZOLE | 02433001 |
| DROPERIDOL                         | 02167832 | CLONAZEPAM | 02242077 | LANSOPRAZOLE | 02402610 |
| DROPERIDOL                         | 02232449 | CLONAZEPAM | 02242078 | LANSOPRAZOLE | 02357682 |
| DROPERIDOL INJECTION               | 02232449 | CLONAZEPAM | 02270668 | LANSOPRAZOLE | 02353830 |
| DROPERIDOL INJECTION USP 2.5MG/ML  | 02167832 | CLONAZEPAM | 02280639 | LANSOPRAZOLE | 02385643 |
| FLUPENTIXOL                        | 02156008 | CLONAZEPAM | 02303302 | LANSOPRAZOLE | 02293811 |
| FLUPENTIXOL                        | 02156040 | CLONAZEPAM | 02303310 | LANSOPRAZOLE | 02280515 |
| FLUPENTIXOL                        | 02156016 | CLONAZEPAM | 02303329 | LANSOPRAZOLE | 02165503 |
| FLUPENTIXOL                        | 02331721 | CLONAZEPAM | 02311593 | LANSOPRAZOLE | 02395258 |
| FLUPENTIXOL (FLUPENTIXOL DIHCL)    | 02156016 | CLONAZEPAM | 02311607 | LANSOPRAZOLE | 02353849 |
| FLUPENTIXOL (FLUPENTIXOL DIHCL)    | 02156008 | CLONAZEPAM | 02311615 | LANSOPRAZOLE | 02402629 |
| FLUPENTIXOL DECANOATE              | 00524530 | CLONAZEPAM | 02340968 | LANSOPRAZOLE | 02357690 |
| FLUPENTIXOL DECANOATE              | 00524522 | CLONAZEPAM | 02340976 | LANSOPRAZOLE | 02385651 |
| FLUPENTIXOL DECANOATE              | 02156032 | CLONAZEPAM | 02344602 | LANSOPRAZOLE | 02293838 |
| FLUPENTIXOL DECANOATE              | 02024950 | CLONAZEPAM | 02344610 | LANSOPRAZOLE | 02280523 |
| FLUPENTIXOL DECANOATE              | 02024969 | CLONAZEPAM | 02344629 | LANSOPRAZOLE | 02165511 |
| FLUPENTIXOL DECANOATE              | 02091895 | CLONAZEPAM | 02365243 | LANSOPRAZOLE | 02433028 |
| FLUPENTIXOL DECANOATE              | 02092816 | CLONAZEPAM | 02365251 | LANSOPRAZOLE | 02395266 |
| FLUPENTIXOL DECANOATE              | 02242363 | CLONAZEPAM | 02365278 | LANSOPRAZOLE | 00000100 |
| FLUPENTIXOL DECANOATE              | 02242364 | CLONAZEPAM | 02442027 | LANSOPRAZOLE | 02249472 |
| FLUPENTIXOL DECANOATE              | 02331713 | CLONAZEPAM | 02442035 | LANSOPRAZOLE | 02249464 |
| FLUPENTIXOL DECANOATE              | 09857337 | CLONAZEPAM | 02442043 | LANSOPRAZOLE | 02258609 |
| FLUPENTIXOL DECANOATE              | 09857339 | CLONAZEPAM | 02442051 | LANSOPRAZOLE | 02258617 |
| FLUPENTIXOL DECANOATE INJECTION BP | 02331713 | CLONAZEPAM | 22123231 | LANSOPRAZOLE | 02354756 |
| FLUPENTIXOL DECANOATE INJECTION BP | 02331721 | CLONAZEPAM | 82048736 | LANSOPRAZOLE | 02354764 |
| FLUPENTIXOL DIHCL                  | 00585157 | CLONAZEPAM | 82207818 | LANSOPRAZOLE | 02366274 |
| FLUPENTIXOL DIHCL                  | 00580619 | CLONAZEPAM | 02365243 | LANSOPRAZOLE | 02366282 |
| FLUPENTIXOL HCL                    | 00580619 | CLONAZEPAM | 02365251 | LANSOPRAZOLE | 02367815 |
| FLUPENTIXOL HCL                    | 00585157 | CLONAZEPAM | 02365278 | LANSOPRAZOLE | 02367823 |
| FLUPENTIXOL HCL                    | 00392316 | CLONAZEPAM | 02177889 | LANSOPRAZOLE | 02369001 |
| FLUPENTIXOL HCL                    | 00544426 | CLONAZEPAM | 02177897 | LANSOPRAZOLE | 02369028 |
| FLUPENTIXOL HCL                    | 02024942 | CLONAZEPAM | 02344602 | LANSOPRAZOLE | 02385767 |

Appendix 1, as supplied by the authors. Appendix to: Welk B, Killin L, Reid JN, et al. Effect of electronic medication reconciliation at the time of hospital discharge on inappropriate medication use in the community: an interrupted time series analysis. *CMAJ Open* 2021. DOI:10.9778/cmajo.20210071. Copyright © 2021 The Author(s) or their employer(s). To receive this resource in an accessible format, please contact us at [cmajgroup@cmaj.ca](mailto:cmajgroup@cmaj.ca).

|                                       |          |            |          |              |          |
|---------------------------------------|----------|------------|----------|--------------|----------|
| FLUPENTIXOL HCL                       | 02025043 | CLONAZEPAM | 02344610 | LANSOPRAZOLE | 02385775 |
| FLUPENTIXOL HCL                       | 02091860 | CLONAZEPAM | 02442027 | LANSOPRAZOLE | 02410370 |
| FLUPENTIXOL HCL                       | 02092794 | CLONAZEPAM | 02442035 | LANSOPRAZOLE | 02410389 |
| FLUPENTIXOL HCL                       | 02129086 | CLONAZEPAM | 02442043 | LANSOPRAZOLE | 02414775 |
| FLUPENTIXOL HCL                       | 02156024 | CLONAZEPAM | 02442051 | LANSOPRAZOLE | 02422808 |
| FLUPHENAZINE DECANOATE                | 00755575 | CLONAZEPAM | 02220598 | LANSOPRAZOLE | 02422816 |
| FLUPHENAZINE DECANOATE                | 02091275 | CLONAZEPAM | 02220601 | LANSOPRAZOLE | 02433672 |
| FLUPHENAZINE DECANOATE                | 00349917 | CLONAZEPAM | 02344629 | LANSOPRAZOLE | 09991289 |
| FLUPHENAZINE DECANOATE                | 02137402 | CLONAZEPAM | 02270641 | LANSOPRAZOLE | 99503010 |
| FLUPHENAZINE DECANOATE                | 02189089 | CLONAZEPAM | 02270668 | LANSOPRAZOLE | 02470780 |
| FLUPHENAZINE DECANOATE                | 02189097 | CLONAZEPAM | 02270676 | LANSOPRAZOLE | 02293811 |
| FLUPHENAZINE DECANOATE                | 02211157 | CLONAZEPAM | 02130998 | LANSOPRAZOLE | 02293838 |
| FLUPHENAZINE DECANOATE                | 02211165 | CLONAZEPAM | 02131013 | LANSOPRAZOLE | 02414767 |
| FLUPHENAZINE DECANOATE                | 02239636 | CLONAZEPAM | 02224100 | LANSOPRAZOLE | 02414775 |
| FLUPHENAZINE DECANOATE                | 02241928 | CLONAZEPAM | 02230950 | LANSOPRAZOLE | 02357682 |
| FLUPHENAZINE DECANOATE                | 02242570 | CLONAZEPAM | 02230951 | LANSOPRAZOLE | 02357690 |
| FLUPHENAZINE DECANOATE INJECTION B.P. | 02189089 | CLONAZEPAM | 02173344 | LANSOPRAZOLE | 02366282 |
| FLUPHENAZINE DECANOATE INJECTION B.P. | 02189097 | CLONAZEPAM | 02173352 | LANSOPRAZOLE | 02385767 |
| FLUPHENAZINE DECANOATE INJECTION, USP | 02383225 | CLONAZEPAM | 02236947 | LANSOPRAZOLE | 02410389 |
| FLUPHENAZINE ENANTHATE                | 00029173 | CLONAZEPAM | 02145227 | LANSOPRAZOLE | 02433001 |
| FLUPHENAZINE HCL                      | 00029378 | CLONAZEPAM | 02145235 | LANSOPRAZOLE | 02433028 |
| FLUPHENAZINE HCL                      | 00405345 | CLONAZEPAM | 02145243 | LANSOPRAZOLE | 02433672 |
| FLUPHENAZINE HCL                      | 00245240 | CLONAZEPAM | 02236948 | LANSOPRAZOLE | 02410370 |
| FLUPHENAZINE HCL                      | 00410632 | CLONAZEPAM | 02048701 | LANSOPRAZOLE | 02385775 |
| FLUPHENAZINE HCL                      | 00029386 | CLONAZEPAM | 02048728 | LANSOPRAZOLE | 02489805 |
| FLUPHENAZINE HCL                      | 00504459 | CLONAZEPAM | 02048736 | LANSOPRAZOLE | 02489813 |
| FLUPHENAZINE HCL                      | 00405361 | CLONAZEPAM | 02179660 | LANSOPRAZOLE | 02353830 |
| FLUPHENAZINE HCL                      | 00029408 | CLONAZEPAM | 02207818 | LANSOPRAZOLE | 02353849 |
| FLUPHENAZINE HCL                      | 00029394 | CLONAZEPAM | 02311593 | LANSOPRAZOLE | 02392402 |
| FLUPHENAZINE HCL                      | 00405353 | CLONAZEPAM | 02311607 | LANSOPRAZOLE | 02392410 |
| FLUPHENAZINE HCL                      | 00471518 | CLONAZEPAM | 02311615 | LANSOPRAZOLE | 02354756 |
| FLUPHENAZINE HCL                      | 00504424 | CLONAZEPAM | 02103656 | LANSOPRAZOLE | 02354764 |
| FLUPHENAZINE HCL                      | 00504432 | CLONAZEPAM | 02103737 | LANSOPRAZOLE | 02395258 |
| FLUPHENAZINE HCL                      | 00563803 | CLONAZEPAM | 02242077 | LANSOPRAZOLE | 02395266 |
| FLUPHENAZINE HCL                      | 00563838 | CLONAZEPAM | 02242078 | LANSOPRAZOLE | 02369001 |
| FLUPHENAZINE HCL                      | 00563846 | CLONAZEPAM | 02233960 | LANSOPRAZOLE | 02369028 |
| FLUPHENAZINE HCL                      | 00582514 | CLONAZEPAM | 02233982 | LANSOPRAZOLE | 02402610 |
| FLUPHENAZINE HCL                      | 00632643 | CLONAZEPAM | 02233985 | LANSOPRAZOLE | 02402629 |
| FLUPHENAZINE HCL                      | 00726338 | CLONAZEPAM | 02239024 | LANSOPRAZOLE | 02422808 |
| FLUPHENAZINE HCL                      | 00726346 | CLONAZEPAM | 02239025 | LANSOPRAZOLE | 02422816 |
| FLUPHENAZINE HCL                      | 00726354 | CLONAZEPAM | 02303310 | LANSOPRAZOLE | 02385643 |
| FLUPHENAZINE HCL                      | 00893420 | CLONAZEPAM | 02303329 | LANSOPRAZOLE | 02385651 |

Appendix 1, as supplied by the authors. Appendix to: Welk B, Killin L, Reid JN, et al. Effect of electronic medication reconciliation at the time of hospital discharge on inappropriate medication use in the community: an interrupted time series analysis. *CMAJ Open* 2021. DOI:10.9778/cmajo.20210071. Copyright © 2021 The Author(s) or their employer(s). To receive this resource in an accessible format, please contact us at [cmajgroup@cmaj.ca](mailto:cmajgroup@cmaj.ca).

|                  |          |                         |          |                     |          |
|------------------|----------|-------------------------|----------|---------------------|----------|
| FLUPHENAZINE HCL | 02244166 | CLONAZEPAM              | 02303337 | LANSOPRAZOLE        | 02280515 |
| FLUPHENAZINE HCL | 00405353 | CLONAZEPAM              | 02345676 | LANSOPRAZOLE        | 02280523 |
| FLUPHENAZINE HCL | 00405345 | CLORAZEPATE DIPOTASSIUM | 00628212 | LANSOPRAZOLE SODIUM | 02258080 |
| FLUPHENAZINE HCL | 00405361 | CLORAZEPATE DIPOTASSIUM | 00264911 | NAPROXEN            | 02443449 |
| FLUPHENAZINE HCL | 00410632 | CLORAZEPATE DIPOTASSIUM | 00860697 | NAPROXEN            | 02458608 |
| FLUPHENAZINE HCL | 00563846 | CLORAZEPATE DIPOTASSIUM | 00860689 | NAPROXEN            | 02361701 |
| FLUPHENAZINE HCL | 00563838 | CLORAZEPATE DIPOTASSIUM | 00628190 | NAPROXEN            | 02361728 |
| FLUPHENAZINE HCL | 00563803 | CLORAZEPATE DIPOTASSIUM | 00264938 | NIZATIDINE          | 00778338 |
| FLUPHENAZINE HCL | 00582514 | CLORAZEPATE DIPOTASSIUM | 00628204 | NIZATIDINE          | 02177714 |
| FLUPHENAZINE HCL | 00726338 | CLORAZEPATE DIPOTASSIUM | 00264946 | NIZATIDINE          | 02220156 |
| FLUPHENAZINE HCL | 00726346 | CLORAZEPATE DIPOTASSIUM | 00860700 | NIZATIDINE          | 02240457 |
| FLUPHENAZINE HCL | 00726354 | CLORAZEPATE DIPOTASSIUM | 49264946 | NIZATIDINE          | 02246046 |
| FLUPHENAZINE HCL | 00893420 | CLORAZEPATE DIPOTASSIUM | 00264946 | NIZATIDINE          | 02240458 |
| FLUSPIRILENE     | 00542903 | CLORAZEPATE DIPOTASSIUM | 00264938 | NIZATIDINE          | 02246047 |
| FLUSPIRILENE     | 00368393 | CLORAZEPATE DIPOTASSIUM | 00264911 | NIZATIDINE          | 00778346 |
| FLUSPIRILENE     | 00542903 | CLORAZEPATE DIPOTASSIUM | 00628204 | NIZATIDINE          | 02220164 |
| FLUSPIRILENE     | 00368393 | CLORAZEPATE DIPOTASSIUM | 00628190 | NIZATIDINE          | 02177722 |
| GEN-CLOZAPINE    | 02247243 | CLORAZEPATE DIPOTASSIUM | 00628212 | NIZATIDINE          | 00220156 |
| GEN-CLOZAPINE    | 02247244 | CLORAZEPATE DIPOTASSIUM | 00860689 | NIZATIDINE          | 02128888 |
| GEN-CLOZAPINE    | 02305003 | CLORAZEPATE DIPOTASSIUM | 00860697 | NIZATIDINE          | 02128896 |
| GEN-CLOZAPINE    | 02305011 | CLORAZEPATE DIPOTASSIUM | 00860700 | NIZATIDINE          | 02155737 |
| GEN-CLOZAPINE    | 02421097 | DIAZEPAM                | 00012874 | NIZATIDINE          | 02155745 |
| HALOPERIDOL      | 00749419 | DIAZEPAM                | 00466891 | NIZATIDINE          | 02185814 |
| HALOPERIDOL      | 00396796 | DIAZEPAM                | 00405337 | NIZATIDINE          | 02185822 |
| HALOPERIDOL      | 00017655 | DIAZEPAM                | 00272450 | NIZATIDINE          | 02230976 |
| HALOPERIDOL      | 00363685 | DIAZEPAM                | 00013773 | NIZATIDINE          | 02238194 |
| HALOPERIDOL      | 00552135 | DIAZEPAM                | 00272639 | NIZATIDINE          | 02238195 |
| HALOPERIDOL      | 00587702 | DIAZEPAM                | 00013293 | NIZATIDINE          | 02239558 |
| HALOPERIDOL      | 00463698 | DIAZEPAM                | 00891797 | NIZATIDINE          | 02239559 |
| HALOPERIDOL      | 00381772 | DIAZEPAM                | 00272647 | NIZATIDINE          | 02247051 |
| HALOPERIDOL      | 00713449 | DIAZEPAM                | 00405329 | NIZATIDINE          | 02247052 |
| HALOPERIDOL      | 00749451 | DIAZEPAM                | 00466905 | NIZATIDINE          | 02220156 |
| HALOPERIDOL      | 00749427 | DIAZEPAM                | 00013757 | NIZATIDINE          | 02220164 |
| HALOPERIDOL      | 00552143 | DIAZEPAM                | 00272434 | NIZATIDINE          | 02185814 |
| HALOPERIDOL      | 00396818 | DIAZEPAM                | 00013277 | NIZATIDINE          | 02246046 |
| HALOPERIDOL      | 00017663 | DIAZEPAM                | 00602825 | NIZATIDINE          | 02246047 |
| HALOPERIDOL      | 00363677 | DIAZEPAM                | 02065614 | NIZATIDINE          | 02239558 |
| HALOPERIDOL      | 00499579 | DIAZEPAM                | 00013285 | NIZATIDINE          | 02239559 |
| HALOPERIDOL      | 00768820 | DIAZEPAM                | 00280429 | NIZATIDINE          | 02240457 |
| HALOPERIDOL      | 00017582 | DIAZEPAM                | 00396230 | NIZATIDINE          | 02240458 |
| HALOPERIDOL      | 00396826 | DIAZEPAM                | 00362158 | NIZATIDINE          | 02247051 |
| HALOPERIDOL      | 00017671 | DIAZEPAM                | 00272442 | NIZATIDINE          | 02247052 |

Appendix 1, as supplied by the authors. Appendix to: Welk B, Killin L, Reid JN, et al. Effect of electronic medication reconciliation at the time of hospital discharge on inappropriate medication use in the community: an interrupted time series analysis. *CMAJ Open* 2021. DOI:10.9778/cmajo.20210071. Copyright © 2021 The Author(s) or their employer(s). To receive this resource in an accessible format, please contact us at [cmajgroup@cmaj.ca](mailto:cmajgroup@cmaj.ca).

|                       |          |          |          |            |          |
|-----------------------|----------|----------|----------|------------|----------|
| HALOPERIDOL           | 00363669 | DIAZEPAM | 00013765 | NIZATIDINE | 02238194 |
| HALOPERIDOL           | 00749435 | DIAZEPAM | 02386143 | NIZATIDINE | 02238195 |
| HALOPERIDOL           | 00552429 | DIAZEPAM | 00399728 | NIZATIDINE | 02177722 |
| HALOPERIDOL           | 00396834 | DIAZEPAM | 09857240 | NIZATIDINE | 02177714 |
| HALOPERIDOL           | 00017698 | DIAZEPAM | 09853340 | OMEPRAZOLE | 02119579 |
| HALOPERIDOL           | 00363650 | DIAZEPAM | 09853430 | OMEPRAZOLE | 02230737 |
| HALOPERIDOL           | 00749443 | DIAZEPAM | 02238162 | OMEPRAZOLE | 02245058 |
| HALOPERIDOL           | 00017574 | DIAZEPAM | 00012661 | OMEPRAZOLE | 00846503 |
| HALOPERIDOL           | 00587788 | DIAZEPAM | 00012688 | OMEPRAZOLE | 09857285 |
| HALOPERIDOL           | 00587796 | DIAZEPAM | 00013110 | OMEPRAZOLE | 09857343 |
| HALOPERIDOL           | 00647969 | DIAZEPAM | 00037265 | OMEPRAZOLE | 09857342 |
| HALOPERIDOL           | 00728292 | DIAZEPAM | 00260320 | OMEPRAZOLE | 09857341 |
| HALOPERIDOL           | 00728306 | DIAZEPAM | 00260339 | OMEPRAZOLE | 02348691 |
| HALOPERIDOL           | 00745561 | DIAZEPAM | 00260347 | OMEPRAZOLE | 02403617 |
| HALOPERIDOL           | 00759503 | DIAZEPAM | 00276642 | OMEPRAZOLE | 02329433 |
| HALOPERIDOL           | 00761745 | DIAZEPAM | 00276650 | OMEPRAZOLE | 02320851 |
| HALOPERIDOL           | 00761753 | DIAZEPAM | 00285439 | OMEPRAZOLE | 02296446 |
| HALOPERIDOL           | 00761761 | DIAZEPAM | 00299545 | OMEPRAZOLE | 09857314 |
| HALOPERIDOL           | 02229307 | DIAZEPAM | 00303461 | OMEPRAZOLE | 09857530 |
| HALOPERIDOL           | 02366010 | DIAZEPAM | 00311596 | OMEPRAZOLE | 09857464 |
| HALOPERIDOL           | 02406411 | DIAZEPAM | 00313580 | OMEPRAZOLE | 02416549 |
| HALOPERIDOL           | 80363669 | DIAZEPAM | 00313890 | OMEPRAZOLE | 02374870 |
| HALOPERIDOL           | 99100846 | DIAZEPAM | 00315052 | OMEPRAZOLE | 02295415 |
| HALOPERIDOL DECANOATE | 09853758 | DIAZEPAM | 00315060 | OMEPRAZOLE | 09857500 |
| HALOPERIDOL DECANOATE | 00599093 | DIAZEPAM | 00315079 | OMEPRAZOLE | 09857267 |
| HALOPERIDOL DECANOATE | 02130300 | DIAZEPAM | 00324264 | OMEPRAZOLE | 09857195 |
| HALOPERIDOL DECANOATE | 00980803 | DIAZEPAM | 00324272 | OMEPRAZOLE | 02190915 |
| HALOPERIDOL DECANOATE | 02130297 | DIAZEPAM | 00324957 | OMEPRAZOLE | 02260867 |
| HALOPERIDOL DECANOATE | 00599085 | DIAZEPAM | 00325422 | OMEPRAZOLE | 02242462 |
| HALOPERIDOL DECANOATE | 00559093 | DIAZEPAM | 00326933 | OMEPRAZOLE | 02245059 |
| HALOPERIDOL DECANOATE | 00897426 | DIAZEPAM | 00337307 | OMEPRAZOLE | 02260859 |
| HALOPERIDOL DECANOATE | 00980781 | DIAZEPAM | 00345601 | OMEPRAZOLE | 02295407 |
| HALOPERIDOL DECANOATE | 02099616 | DIAZEPAM | 00345628 | OMEPRAZOLE | 02296438 |
| HALOPERIDOL DECANOATE | 02099624 | DIAZEPAM | 00392847 | OMEPRAZOLE | 02310252 |
| HALOPERIDOL DECANOATE | 02194430 | DIAZEPAM | 00392855 | OMEPRAZOLE | 02320843 |
| HALOPERIDOL DECANOATE | 02194449 | DIAZEPAM | 00392863 | OMEPRAZOLE | 02329425 |
| HALOPERIDOL DECANOATE | 02211130 | DIAZEPAM | 00404632 | OMEPRAZOLE | 02331764 |
| HALOPERIDOL DECANOATE | 02211149 | DIAZEPAM | 00409632 | OMEPRAZOLE | 02331772 |
| HALOPERIDOL DECANOATE | 02230707 | DIAZEPAM | 00432377 | OMEPRAZOLE | 02333430 |
| HALOPERIDOL DECANOATE | 02230708 | DIAZEPAM | 00432385 | OMEPRAZOLE | 02335220 |
| HALOPERIDOL DECANOATE | 02236866 | DIAZEPAM | 00432393 | OMEPRAZOLE | 02339927 |
| HALOPERIDOL DECANOATE | 02239639 | DIAZEPAM | 00434388 | OMEPRAZOLE | 02340100 |

Appendix 1, as supplied by the authors. Appendix to: Welk B, Killin L, Reid JN, et al. Effect of electronic medication reconciliation at the time of hospital discharge on inappropriate medication use in the community: an interrupted time series analysis. *CMAJ Open* 2021. DOI:10.9778/cmajo.20210071. Copyright © 2021 The Author(s) or their employer(s). To receive this resource in an accessible format, please contact us at [cmajgroup@cmaj.ca](mailto:cmajgroup@cmaj.ca).

|                                            |          |          |          |                                   |          |
|--------------------------------------------|----------|----------|----------|-----------------------------------|----------|
| HALOPERIDOL DECANOATE                      | 02239640 | DIAZEPAM | 00434396 | OMEPRAZOLE                        | 02340119 |
| HALOPERIDOL DECANOATE                      | 02242361 | DIAZEPAM | 00446750 | OMEPRAZOLE                        | 02358050 |
| HALOPERIDOL DECANOATE                      | 02242362 | DIAZEPAM | 00446769 | OMEPRAZOLE                        | 02358069 |
| HALOPERIDOL DECANOATE                      | 02242631 | DIAZEPAM | 00448850 | OMEPRAZOLE                        | 02364352 |
| HALOPERIDOL DECANOATE INJ. LIQ IM 100MG/ML | 02099624 | DIAZEPAM | 00448869 | OMEPRAZOLE                        | 02372258 |
| HALOPERIDOL DECANOATE INJ. LIQ IM 50MG/ML  | 02099616 | DIAZEPAM | 00448877 | OMEPRAZOLE                        | 02372274 |
| HALOPERIDOL DECANOATE INJECTION            | 02194430 | DIAZEPAM | 00507962 | OMEPRAZOLE                        | 02385384 |
| HALOPERIDOL DECANOATE INJECTION            | 02194449 | DIAZEPAM | 00507970 | OMEPRAZOLE                        | 02402416 |
| HALOPERIDOL DECANOATE INJECTION            | 02383748 | DIAZEPAM | 00519324 | OMEPRAZOLE                        | 02411857 |
| HALOPERIDOL DECANOATE INJECTION            | 02383756 | DIAZEPAM | 00882380 | OMEPRAZOLE                        | 02422212 |
| HALOPERIDOL INJ 5MG/ML USP                 | 00808652 | DIAZEPAM | 00882968 | OMEPRAZOLE                        | 02422220 |
| HALOPERIDOL INJECTION                      | 02366010 | DIAZEPAM | 00964999 | OMEPRAZOLE                        | 02435683 |
| HALOPERIDOL INJECTION, USP                 | 02406411 | DIAZEPAM | 02005492 | OMEPRAZOLE                        | 02438968 |
| HALOPERIDOL LA                             | 02130297 | DIAZEPAM | 02070944 | OMEPRAZOLE                        | 02439018 |
| HALOPERIDOL LA                             | 02130300 | DIAZEPAM | 02070952 | OMEPRAZOLE                        | 09093299 |
| HALOPERIDOL LACTATE                        | 00749400 | DIAZEPAM | 02070960 | OMEPRAZOLE                        | 09857350 |
| HALOPERIDOL LACTATE                        | 00808652 | DIAZEPAM | 02137399 | OMEPRAZOLE                        | 09857391 |
| HALOPERIDOL LONG ACTING                    | 02236866 | DIAZEPAM | 02232737 | OMEPRAZOLE                        | 09857467 |
| HALOPERIDOL LONG ACTING                    | 02242631 | DIAZEPAM | 02232749 | OMEPRAZOLE                        | 09991011 |
| HALOPERIDOL TAB 0.5MG                      | 00587796 | DIAZEPAM | 02232751 | OMEPRAZOLE                        | 22123268 |
| HALOPERIDOL TAB 1MG                        | 00587788 | DIAZEPAM | 02243240 | OMEPRAZOLE                        | 66123550 |
| HALOPERIDOL TAB 2MG                        | 00761745 | DIAZEPAM | 02247173 | OMEPRAZOLE                        | 02245058 |
| HALOPERIDOL TAB 5MG                        | 00761753 | DIAZEPAM | 02247174 | OMEPRAZOLE                        | 02245059 |
| HALOPERIDOL-10 TAB 10MG                    | 00761761 | DIAZEPAM | 02247176 | OMEPRAZOLE                        | 02422212 |
| HALOPERIDOL-LA OMEGA                       | 02239639 | DIAZEPAM | 02247490 | OMEPRAZOLE                        | 02422220 |
| HALOPERIDOL-LA OMEGA                       | 02239640 | DIAZEPAM | 02247491 | OMEPRAZOLE                        | 02364352 |
| IPG-OLANZAPINE                             | 02418975 | DIAZEPAM | 02247492 | OMEPRAZOLE                        | 02329425 |
| IPG-OLANZAPINE                             | 02418983 | DIAZEPAM | 02385392 | OMEPRAZOLE                        | 02329433 |
| IPG-OLANZAPINE                             | 02418991 | DIAZEPAM | 09991151 | OMEPRAZOLE                        | 02339927 |
| IPG-OLANZAPINE                             | 02419009 | DIAZEPAM | 22123237 | OMEPRAZOLE                        | 02348691 |
| IPG-OLANZAPINE                             | 02419017 | DIAZEPAM | 99101249 | OMEPRAZOLE                        | 02385376 |
| IPG-OLANZAPINE                             | 02419025 | DIAZEPAM | 02247173 | OMEPRAZOLE                        | 02385384 |
| IPG-OLANZAPINE ODT                         | 02387506 | DIAZEPAM | 02247174 | OMEPRAZOLE                        | 02411857 |
| IPG-OLANZAPINE ODT                         | 02387514 | DIAZEPAM | 02247176 | OMEPRAZOLE                        | 02320843 |
| IPG-OLANZAPINE ODT                         | 02387522 | DIAZEPAM | 00362158 | OMEPRAZOLE                        | 02320851 |
| IPG-OLANZAPINE ODT                         | 02387530 | DIAZEPAM | 00405329 | OMEPRAZOLE                        | 02372258 |
| IPG-RISPERIDONE                            | 02359057 | DIAZEPAM | 00405337 | OMEPRAZOLE                        | 02372274 |
| IPG-RISPERIDONE                            | 02359065 | DIAZEPAM | 02232751 | OMEPRAZOLE                        | 02403617 |
| IPG-RISPERIDONE                            | 02359073 | DIAZEPAM | 00434388 | OMEPRAZOLE                        | 02296438 |
| IPG-RISPERIDONE                            | 02359081 | DIAZEPAM | 02232737 | OMEPRAZOLE                        | 02296446 |
| IPG-RISPERIDONE                            | 02359103 | DIAZEPAM | 00434396 | OMEPRAZOLE (OMEPRAZOLE MAGNESIUM) | 02432765 |
| IPG-RISPERIDONE                            | 02359111 | DIAZEPAM | 00313580 | OMEPRAZOLE (OMEPRAZOLE MAGNESIUM) | 02484617 |

Appendix 1, as supplied by the authors. Appendix to: Welk B, Killin L, Reid JN, et al. Effect of electronic medication reconciliation at the time of hospital discharge on inappropriate medication use in the community: an interrupted time series analysis. *CMAJ Open* 2021. DOI:10.9778/cmajo.20210071. Copyright © 2021 The Author(s) or their employer(s). To receive this resource in an accessible format, please contact us at [cmajgroup@cmaj.ca](mailto:cmajgroup@cmaj.ca).

|                                       |          |                            |          |                                                  |          |
|---------------------------------------|----------|----------------------------|----------|--------------------------------------------------|----------|
| JAMP OLANZAPINE FC                    | 02417243 | DIAZEPAM                   | 02232749 | OMEPRAZOLE (OMEPRAZOLE MAGNESIUM)                | 02436728 |
| JAMP OLANZAPINE FC                    | 02417251 | DIAZEPAM                   | 02243240 | OMEPRAZOLE (OMEPRAZOLE MAGNESIUM)                | 02449927 |
| JAMP OLANZAPINE FC                    | 02417278 | DIAZEPAM                   | 02386143 | OMEPRAZOLE (OMEPRAZOLE MAGNESIUM)                | 02333422 |
| JAMP OLANZAPINE FC                    | 02417286 | DIAZEPAM                   | 00399728 | OMEPRAZOLE (OMEPRAZOLE MAGNESIUM)                | 02333430 |
| JAMP OLANZAPINE FC                    | 02417294 | DIAZEPAM                   | 02385392 | OMEPRAZOLE (OMEPRAZOLE MAGNESIUM)                | 02420198 |
| JAMP OLANZAPINE FC                    | 02417308 | DIAZEPAM                   | 02247490 | OMEPRAZOLE (OMEPRAZOLE MAGNESIUM)                | 02439549 |
| JAMP OLANZAPINE ODT                   | 02406624 | DIAZEPAM                   | 02247491 | OMEPRAZOLE (OMEPRAZOLE MAGNESIUM)                | 02435748 |
| JAMP OLANZAPINE ODT                   | 02406632 | DIAZEPAM                   | 02247492 | OMEPRAZOLE (OMEPRAZOLE MAGNESIUM)                | 02432765 |
| JAMP OLANZAPINE ODT                   | 02406640 | DIAZEPAM                   | 00891797 | OMEPRAZOLE (OMEPRAZOLE MAGNESIUM)                | 02439018 |
| JAMP OLANZAPINE ODT                   | 02406659 | DIAZEPAM & METHYLCELLULOSE | 66990914 | OMEPRAZOLE (OMEPRAZOLE MAGNESIUM)                | 02490692 |
| JAMP QUETIAPINE FUMARATE              | 02390140 | ESTAZOLAM                  | 02015102 | OMEPRAZOLE (OMEPRAZOLE MAGNESIUM)                | 02436213 |
| JAMP QUETIAPINE FUMARATE              | 02390159 | ESTAZOLAM                  | 02016060 | OMEPRAZOLE (OMEPRAZOLE MAGNESIUM)                | 02416549 |
| JAMP QUETIAPINE FUMARATE              | 02390167 | ESTAZOLAM                  | 02016060 | OMEPRAZOLE (OMEPRAZOLE MAGNESIUM)                | 02433281 |
| JAMP QUETIAPINE FUMARATE              | 02390175 | ESTAZOLAM                  | 02015102 | OMEPRAZOLE (OMEPRAZOLE MAGNESIUM)                | 02310252 |
| JAMP-RISPERIDONE                      | 02359529 | EXTEMPORANEOUS MIXTURE     | 99503020 | OMEPRAZOLE (OMEPRAZOLE MAGNESIUM)                | 02310260 |
| JAMP-RISPERIDONE                      | 02359537 | FLURAZEPAM HCL             | 00496545 | OMEPRAZOLE (OMEPRAZOLE MAGNESIUM)                | 02449919 |
| JAMP-RISPERIDONE                      | 02359545 | FLURAZEPAM HCL             | 00012696 | OMEPRAZOLE (OMEPRAZOLE MAGNESIUM)                | 02374870 |
| JAMP-RISPERIDONE                      | 02359553 | FLURAZEPAM HCL             | 00521698 | OMEPRAZOLE (OMEPRAZOLE MAGNESIUM)                | 02260859 |
| JAMP-RISPERIDONE                      | 02359561 | FLURAZEPAM HCL             | 00483826 | OMEPRAZOLE (OMEPRAZOLE MAGNESIUM)                | 02260867 |
| JAMP-RISPERIDONE                      | 02359588 | FLURAZEPAM HCL             | 00012718 | OMEPRAZOLE (OMEPRAZOLE MAGNESIUM)                | 02402416 |
| JAMP-RISPERIDONE                      | 02454319 | FLURAZEPAM HCL             | 00496553 | OMEPRAZOLE (OMEPRAZOLE MAGNESIUM)                | 02331764 |
| LOXAPINE                              | 02230838 | FLURAZEPAM HCL             | 00521701 | OMEPRAZOLE (OMEPRAZOLE MAGNESIUM)                | 02331772 |
| LOXAPINE                              | 02230839 | FLURAZEPAM HCL             | 00483818 | OMEPRAZOLE (OMEPRAZOLE MAGNESIUM)                | 02295407 |
| LOXAPINE                              | 02170000 | FLURAZEPAM HCL             | 00414220 | OMEPRAZOLE (OMEPRAZOLE MAGNESIUM)                | 02295415 |
| LOXAPINE                              | 00361364 | FLURAZEPAM HCL             | 00414239 | OMEPRAZOLE (OMEPRAZOLE MAGNESIUM)                | 02432404 |
| LOXAPINE                              | 02230840 | FLURAZEPAM HCL             | 00578479 | OMEPRAZOLE MAGNESIUM                             | 09857536 |
| LOXAPINE                              | 00439819 | FLURAZEPAM HCL             | 00578487 | OMEPRAZOLE MAGNESIUM                             | 02432404 |
| LOXAPINE                              | 02169991 | FLURAZEPAM HCL             | 00667099 | OMEPRAZOLE MAGNESIUM                             | 02420198 |
| LOXAPINE                              | 02230837 | FLURAZEPAM HCL             | 00667102 | OMEPRAZOLE MAGNESIUM                             | 02439549 |
| LOXAPINE                              | 00217000 | FLURAZEPAM HCL             | 00844698 | OMEPRAZOLE MAGNESIUM                             | 02310260 |
| LOXAPINE                              | 02239918 | FLURAZEPAM HCL             | 00844701 | OMEPRAZOLE MAGNESIUM                             | 02365677 |
| LOXAPINE                              | 02239919 | FLURAZEPAM HCL             | 02232656 | OMEPRAZOLE MAGNESIUM                             | 02449919 |
| LOXAPINE                              | 02239920 | FLURAZEPAM HCL             | 02232657 | OMEPRAZOLE MAGNESIUM                             | 02449927 |
| LOXAPINE                              | 02242868 | FLURAZEPAM HCL             | 02241281 | PANTOPRAZOLE (PANTOPRAZOLE MAGNESIUM)            | 02441853 |
| LOXAPINE HCL                          | 02239101 | FLURAZEPAM HCL             | 02241282 | PANTOPRAZOLE (PANTOPRAZOLE MAGNESIUM)            | 02440628 |
| LOXAPINE HCL                          | 02239921 | FLURAZEPAM HCL             | 02248126 | PANTOPRAZOLE (PANTOPRAZOLE SODIUM SESQUIHYDRATE) | 02386747 |
| LOXAPINE HCL                          | 02255448 | FLURAZEPAM HCL             | 02248127 | PANTOPRAZOLE (PANTOPRAZOLE SODIUM SESQUIHYDRATE) | 02453401 |
| LOXAPINE HCL                          | 02255456 | FLURAZEPAM HCL             | 49012696 | PANTOPRAZOLE (PANTOPRAZOLE SODIUM SESQUIHYDRATE) | 02392615 |
| LOXAPINE HCL IM INJECTION 50MG/ML     | 02232966 | FLURAZEPAM HCL             | 02070901 | PANTOPRAZOLE (PANTOPRAZOLE SODIUM SESQUIHYDRATE) | 02392623 |
| LOXAPINE HCL ORAL CONCENTRATE 25MG/ML | 02232968 | FLURAZEPAM HCL             | 02070928 | PANTOPRAZOLE (PANTOPRAZOLE SODIUM SESQUIHYDRATE) | 02481561 |
| LOXAPINE SUCCINATE                    | 02237652 | FLURAZEPAM HCL             | 02128934 | PANTOPRAZOLE (PANTOPRAZOLE SODIUM SESQUIHYDRATE) | 02481588 |
| LOXAPINE SUCCINATE                    | 02237535 | FLURAZEPAM HCL             | 02128942 | PANTOPRAZOLE (PANTOPRAZOLE SODIUM)               | 02306727 |

Appendix 1, as supplied by the authors. Appendix to: Welk B, Killin L, Reid JN, et al. Effect of electronic medication reconciliation at the time of hospital discharge on inappropriate medication use in the community: an interrupted time series analysis. *CMAJ Open* 2021. DOI:10.9778/cmajo.20210071. Copyright © 2021 The Author(s) or their employer(s). To receive this resource in an accessible format, please contact us at [cmajgroup@cmaj.ca](mailto:cmajgroup@cmaj.ca).

|                                 |          |                             |          |                                    |          |
|---------------------------------|----------|-----------------------------|----------|------------------------------------|----------|
| LOXAPINE SUCCINATE              | 02170027 | FLURAZEPAM HCL              | 02248126 | PANTOPRAZOLE (PANTOPRAZOLE SODIUM) | 02441527 |
| LOXAPINE SUCCINATE              | 00346799 | FLURAZEPAM HCL              | 02248127 | PANTOPRAZOLE MAGNESIUM             | 02408570 |
| LOXAPINE SUCCINATE              | 00346802 | FLURAZEPAM HCL              | 00012696 | PANTOPRAZOLE MAGNESIUM             | 02440628 |
| LOXAPINE SUCCINATE              | 02170132 | FLURAZEPAM HCL              | 00012718 | PANTOPRAZOLE MAGNESIUM             | 02441853 |
| LOXAPINE SUCCINATE              | 02237653 | FLURAZEPAM HCL              | 00521698 | PANTOPRAZOLE MAGNESIUM             | 02267233 |
| LOXAPINE SUCCINATE              | 02237536 | FLURAZEPAM HCL              | 00521701 | PANTOPRAZOLE MAGNESIUM             | 02466147 |
| LOXAPINE SUCCINATE              | 02237654 | FLURAZEPAM HCL              | 00578479 | PANTOPRAZOLE SODIUM                | 02428164 |
| LOXAPINE SUCCINATE              | 02237537 | FLURAZEPAM HCL              | 02232656 | PANTOPRAZOLE SODIUM                | 02417448 |
| LOXAPINE SUCCINATE              | 02170035 | FLURAZEPAM HCL              | 00578487 | PANTOPRAZOLE SODIUM                | 02416565 |
| LOXAPINE SUCCINATE              | 00346810 | FLURAZEPAM HCL              | 02232657 | PANTOPRAZOLE SODIUM                | 02415208 |
| LOXAPINE SUCCINATE              | 00346780 | FLURAZEPAM HCL              | 00496545 | PANTOPRAZOLE SODIUM                | 02412969 |
| LOXAPINE SUCCINATE              | 02170019 | FLURAZEPAM HCL              | 00496553 | PANTOPRAZOLE SODIUM                | 02357054 |
| LOXAPINE SUCCINATE              | 02237651 | FLURAZEPAM HCL              | 00667102 | PANTOPRAZOLE SODIUM                | 02437945 |
| LOXAPINE SUCCINATE              | 02237534 | FLURAZEPAM HCL              | 00667099 | PANTOPRAZOLE SODIUM                | 02239616 |
| LOXAPINE SUCCINATE              | 02236943 | FLURAZEPAM HCL              | 02241281 | PANTOPRAZOLE SODIUM                | 00239616 |
| LOXAPINE SUCCINATE              | 02236944 | FLURAZEPAM HCL              | 02241282 | PANTOPRAZOLE SODIUM                | 02308703 |
| LOXAPINE SUCCINATE              | 02236945 | FLURAZEPAM HCL              | 00414220 | PANTOPRAZOLE SODIUM                | 02307871 |
| LOXAPINE SUCCINATE              | 02236946 | FLURAZEPAM HCL              | 00414239 | PANTOPRAZOLE SODIUM                | 02309866 |
| LOXAPINE SUCCINATE              | 02238196 | FLURAZEPAM HCL              | 00483826 | PANTOPRAZOLE SODIUM                | 02301083 |
| LOXAPINE SUCCINATE              | 02238197 | FLURAZEPAM HCL              | 00483818 | PANTOPRAZOLE SODIUM                | 02300486 |
| LOXAPINE SUCCINATE              | 02238198 | IVABRADINE (IVABRADINE HCL) | 02459973 | PANTOPRAZOLE SODIUM                | 02299585 |
| LOXAPINE SUCCINATE              | 02238199 | IVABRADINE (IVABRADINE HCL) | 02459981 | PANTOPRAZOLE SODIUM                | 02292920 |
| LOXAPINE SUCCINATE              | 02242956 | IVABRADINE HCL              | 02459973 | PANTOPRAZOLE SODIUM                | 02285487 |
| LOXAPINE SUCCINATE TABLETS 10MG | 02232960 | IVABRADINE HCL              | 02459981 | PANTOPRAZOLE SODIUM                | 02229453 |
| LOXAPINE SUCCINATE TABLETS 25MG | 02232961 | KETAZOLAM                   | 00514519 | PANTOPRAZOLE SODIUM                | 02305046 |
| LOXAPINE SUCCINATE TABLETS 5 MG | 02232938 | KETAZOLAM                   | 00514527 | PANTOPRAZOLE SODIUM                | 02244730 |
| LOXAPINE SUCCINATE TABLETS 50MG | 02232962 | KETAZOLAM                   | 00559245 | PANTOPRAZOLE SODIUM                | 02285479 |
| LOXAPINE-10                     | 02238197 | KETAZOLAM                   | 01919512 | PANTOPRAZOLE SODIUM                | 02291665 |
| LOXAPINE-25                     | 02238198 | KETAZOLAM                   | 01919520 | PANTOPRAZOLE SODIUM                | 02292912 |
| LOXAPINE-5                      | 02238196 | LORAZEPAM                   | 00865672 | PANTOPRAZOLE SODIUM                | 02294656 |
| LOXAPINE-50                     | 02238199 | LORAZEPAM                   | 02041413 | PANTOPRAZOLE SODIUM                | 02294672 |
| MAR-OLANZAPINE                  | 02421232 | LORAZEPAM                   | 00728187 | PANTOPRAZOLE SODIUM                | 02301075 |
| MAR-OLANZAPINE                  | 02421240 | LORAZEPAM                   | 00399124 | PANTOPRAZOLE SODIUM                | 02305038 |
| MAR-OLANZAPINE                  | 02421259 | LORAZEPAM                   | 00711101 | PANTOPRAZOLE SODIUM                | 02306727 |
| MAR-OLANZAPINE                  | 02421267 | LORAZEPAM                   | 00655740 | PANTOPRAZOLE SODIUM                | 02307863 |
| MAR-OLANZAPINE                  | 02421275 | LORAZEPAM                   | 02041456 | PANTOPRAZOLE SODIUM                | 02308681 |
| MAR-OLANZAPINE                  | 02421283 | LORAZEPAM                   | 00722138 | PANTOPRAZOLE SODIUM                | 02309858 |
| MAR-OLANZAPINE ODT              | 02389088 | LORAZEPAM                   | 02410753 | PANTOPRAZOLE SODIUM                | 02309998 |
| MAR-OLANZAPINE ODT              | 02389096 | LORAZEPAM                   | 00865680 | PANTOPRAZOLE SODIUM                | 02310007 |
| MAR-OLANZAPINE ODT              | 02389118 | LORAZEPAM                   | 02041421 | PANTOPRAZOLE SODIUM                | 02310198 |
| MAR-OLANZAPINE ODT              | 02389126 | LORAZEPAM                   | 00728195 | PANTOPRAZOLE SODIUM                | 02310201 |
| MAR-RISPERIDONE                 | 02371766 | LORAZEPAM                   | 00348325 | PANTOPRAZOLE SODIUM                | 02316455 |

Appendix 1, as supplied by the authors. Appendix to: Welk B, Killin L, Reid JN, et al. Effect of electronic medication reconciliation at the time of hospital discharge on inappropriate medication use in the community: an interrupted time series analysis. *CMAJ Open* 2021. DOI:10.9778/cmajo.20210071. Copyright © 2021 The Author(s) or their employer(s). To receive this resource in an accessible format, please contact us at [cmajgroup@cmaj.ca](mailto:cmajgroup@cmaj.ca).

|                                               |          |           |          |                     |          |
|-----------------------------------------------|----------|-----------|----------|---------------------|----------|
| MAR-RISPERIDONE                               | 02371774 | LORAZEPAM | 00637742 | PANTOPRAZOLE SODIUM | 02316463 |
| MAR-RISPERIDONE                               | 02371782 | LORAZEPAM | 00655759 | PANTOPRAZOLE SODIUM | 02318687 |
| MAR-RISPERIDONE                               | 02371790 | LORAZEPAM | 00557757 | PANTOPRAZOLE SODIUM | 02318695 |
| MAR-RISPERIDONE                               | 02371804 | LORAZEPAM | 02041464 | PANTOPRAZOLE SODIUM | 02328704 |
| MAR-RISPERIDONE                               | 02371812 | LORAZEPAM | 02410761 | PANTOPRAZOLE SODIUM | 02330709 |
| MESORIDAZINE (MESORIDAZINE BESYLATE)          | 00027464 | LORAZEPAM | 00865699 | PANTOPRAZOLE SODIUM | 02334658 |
| MESORIDAZINE (MESORIDAZINE BESYLATE)          | 00027456 | LORAZEPAM | 02041448 | PANTOPRAZOLE SODIUM | 02334666 |
| MESORIDAZINE (MESORIDAZINE BESYLATE)          | 00027448 | LORAZEPAM | 00728209 | PANTOPRAZOLE SODIUM | 02336308 |
| MESORIDAZINE BESYLATE                         | 00027448 | LORAZEPAM | 00348333 | PANTOPRAZOLE SODIUM | 02339072 |
| MESORIDAZINE BESYLATE                         | 00259489 | LORAZEPAM | 00655767 | PANTOPRAZOLE SODIUM | 02340097 |
| MESORIDAZINE BESYLATE                         | 00027456 | LORAZEPAM | 00637750 | PANTOPRAZOLE SODIUM | 02343789 |
| MESORIDAZINE BESYLATE                         | 00027464 | LORAZEPAM | 00557765 | PANTOPRAZOLE SODIUM | 02352214 |
| METHOTRIMEPRAZINE                             | 02232904 | LORAZEPAM | 02041472 | PANTOPRAZOLE SODIUM | 02354179 |
| METHOTRIMEPRAZINE                             | 01927728 | LORAZEPAM | 02041405 | PANTOPRAZOLE SODIUM | 02358867 |
| METHOTRIMEPRAZINE                             | 02232905 | LORAZEPAM | 00557773 | PANTOPRAZOLE SODIUM | 02358875 |
| METHOTRIMEPRAZINE                             | 02232903 | LORAZEPAM | 09857216 | PANTOPRAZOLE SODIUM | 02363410 |
| METHOTRIMEPRAZINE                             | 00903463 | LORAZEPAM | 02243278 | PANTOPRAZOLE SODIUM | 02363429 |
| METHOTRIMEPRAZINE                             | 22123112 | LORAZEPAM | 00655643 | PANTOPRAZOLE SODIUM | 02370808 |
| METHOTRIMEPRAZINE                             | 22123124 | LORAZEPAM | 00655651 | PANTOPRAZOLE SODIUM | 02385740 |
| METHOTRIMEPRAZINE                             | 22123130 | LORAZEPAM | 00655678 | PANTOPRAZOLE SODIUM | 02385759 |
| METHOTRIMEPRAZINE                             | 22123189 | LORAZEPAM | 02240725 | PANTOPRAZOLE SODIUM | 02408414 |
| METHOTRIMEPRAZINE                             | 99100694 | LORAZEPAM | 02240726 | PANTOPRAZOLE SODIUM | 02416557 |
| METHOTRIMEPRAZINE                             | 99100837 | LORAZEPAM | 02240727 | PANTOPRAZOLE SODIUM | 02425378 |
| METHOTRIMEPRAZINE                             | 99100838 | LORAZEPAM | 02245784 | PANTOPRAZOLE SODIUM | 02428172 |
| METHOTRIMEPRAZINE (METHOTRIMEPRAZINE HCL)     | 01927728 | LORAZEPAM | 02245785 | PANTOPRAZOLE SODIUM | 02428180 |
| METHOTRIMEPRAZINE (METHOTRIMEPRAZINE HCL)     | 01927698 | LORAZEPAM | 02245786 | PANTOPRAZOLE SODIUM | 02431327 |
| METHOTRIMEPRAZINE (METHOTRIMEPRAZINE HCL)     | 01927701 | LORAZEPAM | 02280477 | PANTOPRAZOLE SODIUM | 02439107 |
| METHOTRIMEPRAZINE (METHOTRIMEPRAZINE MALEATE) | 02238403 | LORAZEPAM | 02280485 | PANTOPRAZOLE SODIUM | 02441527 |
| METHOTRIMEPRAZINE (METHOTRIMEPRAZINE MALEATE) | 02238404 | LORAZEPAM | 02298201 | PANTOPRAZOLE SODIUM | 02445867 |
| METHOTRIMEPRAZINE (METHOTRIMEPRAZINE MALEATE) | 02238405 | LORAZEPAM | 02298228 | PANTOPRAZOLE SODIUM | 02458969 |
| METHOTRIMEPRAZINE (METHOTRIMEPRAZINE MALEATE) | 02238406 | LORAZEPAM | 02298236 | PANTOPRAZOLE SODIUM | 02467372 |
| METHOTRIMEPRAZINE (METHOTRIMEPRAZINE MALEATE) | 01964933 | LORAZEPAM | 02347733 | PANTOPRAZOLE SODIUM | 02469138 |
| METHOTRIMEPRAZINE (METHOTRIMEPRAZINE MALEATE) | 01964925 | LORAZEPAM | 02347741 | PANTOPRAZOLE SODIUM | 02471825 |
| METHOTRIMEPRAZINE (METHOTRIMEPRAZINE MALEATE) | 01964909 | LORAZEPAM | 02347768 | PANTOPRAZOLE SODIUM | 02478781 |
| METHOTRIMEPRAZINE (METHOTRIMEPRAZINE MALEATE) | 01927655 | LORAZEPAM | 02351072 | PANTOPRAZOLE SODIUM | 82229453 |
| METHOTRIMEPRAZINE (METHOTRIMEPRAZINE MALEATE) | 01927663 | LORAZEPAM | 02351080 | RABEPRAZOLE SODIUM  | 02422638 |
| METHOTRIMEPRAZINE (METHOTRIMEPRAZINE MALEATE) | 01927647 | LORAZEPAM | 02351099 | RABEPRAZOLE SODIUM  | 02320614 |
| METHOTRIMEPRAZINE (METHOTRIMEPRAZINE MALEATE) | 01927671 | LORAZEPAM | 02388669 | RABEPRAZOLE SODIUM  | 02298074 |
| METHOTRIMEPRAZINE (METHOTRIMEPRAZINE MALEATE) | 02241197 | LORAZEPAM | 02410745 | RABEPRAZOLE SODIUM  | 02296632 |
| METHOTRIMEPRAZINE (METHOTRIMEPRAZINE MALEATE) | 02241198 | LORAZEPAM | 02429810 | RABEPRAZOLE SODIUM  | 02408392 |
| METHOTRIMEPRAZINE (METHOTRIMEPRAZINE MALEATE) | 02241199 | LORAZEPAM | 02429829 | RABEPRAZOLE SODIUM  | 02345579 |
| METHOTRIMEPRAZINE HCL                         | 01927698 | LORAZEPAM | 02438704 | RABEPRAZOLE SODIUM  | 02356511 |

Appendix 1, as supplied by the authors. Appendix to: Welk B, Killin L, Reid JN, et al. Effect of electronic medication reconciliation at the time of hospital discharge on inappropriate medication use in the community: an interrupted time series analysis. *CMAJ Open* 2021. DOI:10.9778/cmajo.20210071. Copyright © 2021 The Author(s) or their employer(s). To receive this resource in an accessible format, please contact us at [cmajgroup@cmaj.ca](mailto:cmajgroup@cmaj.ca).



|                           |          |           |          |                    |          |
|---------------------------|----------|-----------|----------|--------------------|----------|
| METHOTRIMEPRAZINE HCL     | 00025003 | LORAZEPAM | 05022457 | RABEPRAZOLE SODIUM | 02381737 |
| METHOTRIMEPRAZINE HCL     | 00025194 | LORAZEPAM | 22123248 | RABEPRAZOLE SODIUM | 02314177 |
| METHOTRIMEPRAZINE HCL     | 00025208 | LORAZEPAM | 49348325 | RABEPRAZOLE SODIUM | 02310805 |
| METHOTRIMEPRAZINE HCL     | 01927701 | LORAZEPAM | 80637742 | RABEPRAZOLE SODIUM | 02243796 |
| METHOTRIMEPRAZINE MALEATE | 01964925 | LORAZEPAM | 80711101 | RABEPRAZOLE SODIUM | 02422646 |
| METHOTRIMEPRAZINE MALEATE | 01927663 | LORAZEPAM | 00655740 | RABEPRAZOLE SODIUM | 02320622 |
| METHOTRIMEPRAZINE MALEATE | 00025593 | LORAZEPAM | 00655759 | RABEPRAZOLE SODIUM | 02298082 |
| METHOTRIMEPRAZINE MALEATE | 02238405 | LORAZEPAM | 00655767 | RABEPRAZOLE SODIUM | 02296640 |
| METHOTRIMEPRAZINE MALEATE | 02238403 | LORAZEPAM | 02245784 | RABEPRAZOLE SODIUM | 02408406 |
| METHOTRIMEPRAZINE MALEATE | 00025577 | LORAZEPAM | 02245785 | RABEPRAZOLE SODIUM | 02345587 |
| METHOTRIMEPRAZINE MALEATE | 01927647 | LORAZEPAM | 02245786 | RABEPRAZOLE SODIUM | 02356538 |
| METHOTRIMEPRAZINE MALEATE | 01964933 | LORAZEPAM | 02351072 | RABEPRAZOLE SODIUM | 02381745 |
| METHOTRIMEPRAZINE MALEATE | 01927671 | LORAZEPAM | 02351080 | RABEPRAZOLE SODIUM | 02314185 |
| METHOTRIMEPRAZINE MALEATE | 00025607 | LORAZEPAM | 02351099 | RABEPRAZOLE SODIUM | 02310813 |
| METHOTRIMEPRAZINE MALEATE | 02238406 | LORAZEPAM | 02429802 | RABEPRAZOLE SODIUM | 02243797 |
| METHOTRIMEPRAZINE MALEATE | 02238404 | LORAZEPAM | 02429810 | RABEPRAZOLE SODIUM | 02315181 |
| METHOTRIMEPRAZINE MALEATE | 00025585 | LORAZEPAM | 02429829 | RABEPRAZOLE SODIUM | 02315203 |
| METHOTRIMEPRAZINE MALEATE | 01964909 | LORAZEPAM | 02243278 | RABEPRAZOLE SODIUM | 02320452 |
| METHOTRIMEPRAZINE MALEATE | 01927655 | LORAZEPAM | 02388669 | RABEPRAZOLE SODIUM | 02320460 |
| METHOTRIMEPRAZINE MALEATE | 00927647 | LORAZEPAM | 02438704 | RABEPRAZOLE SODIUM | 02320592 |
| METHOTRIMEPRAZINE MALEATE | 00927655 | LORAZEPAM | 02410745 | RABEPRAZOLE SODIUM | 02320606 |
| METHOTRIMEPRAZINE MALEATE | 00927663 | LORAZEPAM | 02410753 | RABEPRAZOLE SODIUM | 02330083 |
| METHOTRIMEPRAZINE MALEATE | 00927671 | LORAZEPAM | 02410761 | RABEPRAZOLE SODIUM | 02330091 |
| METHOTRIMEPRAZINE MALEATE | 02239632 | LORAZEPAM | 02347733 | RABEPRAZOLE SODIUM | 02335166 |
| METHOTRIMEPRAZINE MALEATE | 02239633 | LORAZEPAM | 02347741 | RABEPRAZOLE SODIUM | 02335174 |
| METHOTRIMEPRAZINE MALEATE | 02239634 | LORAZEPAM | 02347768 | RABEPRAZOLE SODIUM | 02345994 |
| METHOTRIMEPRAZINE MALEATE | 02239635 | LORAZEPAM | 02298201 | RABEPRAZOLE SODIUM | 02346001 |
| METHOTRIMEPRAZINE MALEATE | 02241197 | LORAZEPAM | 02298228 | RABEPRAZOLE SODIUM | 02370719 |
| METHOTRIMEPRAZINE MALEATE | 02241198 | LORAZEPAM | 02298236 | RABEPRAZOLE SODIUM | 02370727 |
| METHOTRIMEPRAZINE MALEATE | 02241199 | LORAZEPAM | 00728187 | RABEPRAZOLE SODIUM | 02385449 |
| METHOTRIMEPRAZINE-2       | 02239632 | LORAZEPAM | 00728195 | RABEPRAZOLE SODIUM | 02385457 |
| METHOTRIMEPRAZINE-25      | 02239634 | LORAZEPAM | 00728209 | RABEPRAZOLE SODIUM | 03205920 |
| METHOTRIMEPRAZINE-5       | 02239633 | LORAZEPAM | 00655643 | RABEPRAZOLE SODIUM | 24084060 |
| METHOTRIMEPRAZINE-50      | 02239635 | LORAZEPAM | 00655651 | RABEPRAZOLE SODIUM | 02422638 |
| MINT-ARIPIRAZOLE          | 02483556 | LORAZEPAM | 00655678 | RABEPRAZOLE SODIUM | 02422646 |
| MINT-ARIPIRAZOLE          | 02483564 | LORAZEPAM | 02240725 | RABEPRAZOLE SODIUM | 02484161 |
| MINT-ARIPIRAZOLE          | 02483572 | LORAZEPAM | 02240726 | RABEPRAZOLE SODIUM | 02484188 |
| MINT-ARIPIRAZOLE          | 02483580 | LORAZEPAM | 02240727 | RABEPRAZOLE SODIUM | 02345579 |
| MINT-ARIPIRAZOLE          | 02483599 | LORAZEPAM | 00637742 | RABEPRAZOLE SODIUM | 02345587 |
| MINT-ARIPIRAZOLE          | 02483602 | LORAZEPAM | 00637750 | RABEPRAZOLE SODIUM | 02320452 |
| MINT-OLANZAPINE           | 02410141 | LORAZEPAM | 00711101 | RABEPRAZOLE SODIUM | 02320460 |
| MINT-OLANZAPINE           | 02410168 | MIDAZOLAM | 02243254 | RABEPRAZOLE SODIUM | 02415283 |

Appendix 1, as supplied by the authors. Appendix to: Welk B, Killin L, Reid JN, et al. Effect of electronic medication reconciliation at the time of hospital discharge on inappropriate medication use in the community: an interrupted time series analysis. *CMAJ Open* 2021. DOI:10.9778/cmajo.20210071. Copyright © 2021 The Author(s) or their employer(s). To receive this resource in an accessible format, please contact us at [cmajgroup@cmaj.ca](mailto:cmajgroup@cmaj.ca).

|                              |          |                           |          |                             |          |
|------------------------------|----------|---------------------------|----------|-----------------------------|----------|
| MINT-OLANZAPINE              | 02410176 | MIDAZOLAM                 | 02382342 | RABEPRAZOLE SODIUM          | 02415291 |
| MINT-OLANZAPINE              | 02410184 | MIDAZOLAM                 | 02382350 | RABEPRAZOLE SODIUM          | 02408392 |
| MINT-OLANZAPINE              | 02410192 | MIDAZOLAM                 | 02382377 | RABEPRAZOLE SODIUM          | 02408406 |
| MINT-OLANZAPINE              | 02410206 | MIDAZOLAM                 | 02382385 | RABEPRAZOLE SODIUM          | 02345994 |
| MINT-OLANZAPINE ODT          | 02436965 | MIDAZOLAM                 | 02240285 | RABEPRAZOLE SODIUM          | 02346001 |
| MINT-OLANZAPINE ODT          | 02436973 | MIDAZOLAM                 | 02240286 | RABEPRAZOLE SODIUM          | 02243796 |
| MINT-OLANZAPINE ODT          | 02436981 | MIDAZOLAM                 | 02242904 | RABEPRAZOLE SODIUM          | 02243797 |
| MINT-OLANZAPINE ODT          | 02437007 | MIDAZOLAM                 | 02242905 | RABEPRAZOLE SODIUM          | 02381737 |
| MYLAN-OLANZAPINE             | 02337878 | MIDAZOLAM                 | 02423758 | RABEPRAZOLE SODIUM          | 02381745 |
| MYLAN-OLANZAPINE             | 02337886 | MIDAZOLAM                 | 02423766 | RABEPRAZOLE SODIUM          | 02310805 |
| MYLAN-OLANZAPINE             | 02337894 | MIDAZOLAM                 | 02382873 | RABEPRAZOLE SODIUM          | 02310813 |
| MYLAN-OLANZAPINE             | 02337908 | MIDAZOLAM                 | 02382903 | RABEPRAZOLE SODIUM          | 02315181 |
| MYLAN-OLANZAPINE             | 02337916 | MIDAZOLAM                 | 02382342 | RABEPRAZOLE SODIUM          | 02315203 |
| MYLAN-OLANZAPINE             | 02337924 | MIDAZOLAM                 | 02382350 | RABEPRAZOLE SODIUM          | 02385449 |
| MYLAN-OLANZAPINE ODT         | 02382709 | MIDAZOLAM                 | 02382377 | RABEPRAZOLE SODIUM          | 02385457 |
| MYLAN-OLANZAPINE ODT         | 02382717 | MIDAZOLAM                 | 02382385 | RABEPRAZOLE SODIUM          | 02320614 |
| MYLAN-OLANZAPINE ODT         | 02382725 | MIDAZOLAM (MIDAZOLAM HCL) | 02243253 | RABEPRAZOLE SODIUM          | 02320622 |
| MYLAN-OLANZAPINE ODT         | 02382733 | MIDAZOLAM (MIDAZOLAM HCL) | 02243254 | RABEPRAZOLE SODIUM          | 02356511 |
| MYLAN-RISPERIDONE            | 02282240 | MIDAZOLAM (MIDAZOLAM HCL) | 02243934 | RABEPRAZOLE SODIUM          | 02356538 |
| MYLAN-RISPERIDONE            | 02282259 | MIDAZOLAM (MIDAZOLAM HCL) | 02243935 | RABEPRAZOLE SODIUM          | 02298074 |
| MYLAN-RISPERIDONE            | 02282267 | MIDAZOLAM (MIDAZOLAM HCL) | 02383586 | RABEPRAZOLE SODIUM          | 02298082 |
| MYLAN-RISPERIDONE            | 02282275 | MIDAZOLAM (MIDAZOLAM HCL) | 02383594 | RABEPRAZOLE SODIUM          | 02419785 |
| MYLAN-RISPERIDONE            | 02282283 | MIDAZOLAM (MIDAZOLAM HCL) | 02241753 | RABEPRAZOLE SODIUM          | 02419793 |
| MYLAN-RISPERIDONE            | 02282291 | MIDAZOLAM (MIDAZOLAM HCL) | 02241754 | RABEPRAZOLE SODIUM          | 02330083 |
| MYLAN-RISPERIDONE ODT        | 02413485 | MIDAZOLAM (MIDAZOLAM HCL) | 02242653 | RABEPRAZOLE SODIUM          | 02330091 |
| MYLAN-RISPERIDONE ODT        | 02413493 | MIDAZOLAM (MIDAZOLAM HCL) | 02242654 | RABEPRAZOLE SODIUM          | 02314177 |
| MYLAN-RISPERIDONE ODT        | 02413507 | MIDAZOLAM HCL             | 02240285 | RABEPRAZOLE SODIUM          | 02314185 |
| MYLAN-RISPERIDONE ODT        | 02413515 | MIDAZOLAM HCL             | 00784516 | RABEPRAZOLE SODIUM          | 02296632 |
| MYLAN-RISPERIDONE ODT        | 02413523 | MIDAZOLAM HCL             | 00766011 | RABEPRAZOLE SODIUM          | 02296640 |
| NOVO-CHLORPROMAZINE 200MG    | 00021342 | MIDAZOLAM HCL             | 09857438 | RANITIDINE                  | 00740756 |
| NOVO-CHLORPROMAZINE TAB 10MG | 00232157 | MIDAZOLAM HCL             | 09857437 | RANITIDINE                  | 02385961 |
| NTP-OLANZAPINE               | 02346044 | MIDAZOLAM HCL             | 09857436 | RANITIDINE (RANITIDINE HCL) | 02407523 |
| NTP-OLANZAPINE               | 02346052 | MIDAZOLAM HCL             | 09857225 | RANITIDINE (RANITIDINE HCL) | 02452464 |
| NTP-OLANZAPINE               | 02346060 | MIDAZOLAM HCL             | 02242905 | RANITIDINE (RANITIDINE HCL) | 02248570 |
| NTP-OLANZAPINE               | 02346079 | MIDAZOLAM HCL             | 02240286 | RANITIDINE (RANITIDINE HCL) | 02248571 |
| NTP-OLANZAPINE               | 02346087 | MIDAZOLAM HCL             | 02241753 | RANITIDINE (RANITIDINE HCL) | 02484501 |
| NU-HALOPERIDOL               | 02239216 | MIDAZOLAM HCL             | 02241754 | RANITIDINE (RANITIDINE HCL) | 02484528 |
| NU-HALOPERIDOL               | 02239217 | MIDAZOLAM HCL             | 02242653 | RANITIDINE (RANITIDINE HCL) | 02280833 |
| NU-HALOPERIDOL               | 02239218 | MIDAZOLAM HCL             | 02242654 | RANITIDINE (RANITIDINE HCL) | 00733059 |
| NU-HALOPERIDOL               | 02239219 | MIDAZOLAM HCL             | 02242904 | RANITIDINE (RANITIDINE HCL) | 00733067 |
| NU-HALOPERIDOL               | 02239220 | MIDAZOLAM HCL             | 02243253 | RANITIDINE (RANITIDINE HCL) | 02265591 |
| NU-LOXAPINE                  | 02237534 | MIDAZOLAM HCL             | 02243934 | RANITIDINE (RANITIDINE HCL) | 02265605 |

Appendix 1, as supplied by the authors. Appendix to: Welk B, Killin L, Reid JN, et al. Effect of electronic medication reconciliation at the time of hospital discharge on inappropriate medication use in the community: an interrupted time series analysis. *CMAJ Open* 2021. DOI:10.9778/cmajo.20210071. Copyright © 2021 The Author(s) or their employer(s). To receive this resource in an accessible format, please contact us at [cmajgroup@cmaj.ca](mailto:cmajgroup@cmaj.ca).

|                |          |               |          |                             |          |
|----------------|----------|---------------|----------|-----------------------------|----------|
| NU-LOXAPINE    | 02237535 | MIDAZOLAM HCL | 02243935 | RANITIDINE (RANITIDINE HCL) | 02243038 |
| NU-LOXAPINE    | 02237536 | MIDAZOLAM HCL | 02244788 | RANITIDINE (RANITIDINE HCL) | 02243039 |
| NU-LOXAPINE    | 02237537 | MIDAZOLAM HCL | 02244789 | RANITIDINE (RANITIDINE HCL) | 02463717 |
| NU-OLANZAPINE  | 02310015 | MIDAZOLAM HCL | 02382873 | RANITIDINE (RANITIDINE HCL) | 02463725 |
| NU-OLANZAPINE  | 02310031 | MIDAZOLAM HCL | 02382903 | RANITIDINE (RANITIDINE HCL) | 02473534 |
| NU-OLANZAPINE  | 02310058 | MIDAZOLAM HCL | 02423758 | RANITIDINE (RANITIDINE HCL) | 02473542 |
| NU-OLANZAPINE  | 02310082 | MIDAZOLAM HCL | 02423766 | RANITIDINE (RANITIDINE HCL) | 02443708 |
| NU-OLANZAPINE  | 02310090 | MIDAZOLAM HCL | 99100865 | RANITIDINE (RANITIDINE HCL) | 02443716 |
| NU-RISPERIDONE | 02334372 | NITRAZEPAM    | 02234007 | RANITIDINE (RANITIDINE HCL) | 02367378 |
| NU-RISPERIDONE | 02334380 | NITRAZEPAM    | 02245231 | RANITIDINE (RANITIDINE HCL) | 02367386 |
| NU-RISPERIDONE | 02334399 | NITRAZEPAM    | 02229655 | RANITIDINE (RANITIDINE HCL) | 02207761 |
| NU-RISPERIDONE | 02334402 | NITRAZEPAM    | 00511536 | RANITIDINE (RANITIDINE HCL) | 02207788 |
| NU-RISPERIDONE | 02334410 | NITRAZEPAM    | 00511528 | RANITIDINE (RANITIDINE HCL) | 02245782 |
| NU-RISPERIDONE | 02334429 | NITRAZEPAM    | 02234003 | RANITIDINE (RANITIDINE HCL) | 02245783 |
| OLANZAPINE     | 02414546 | NITRAZEPAM    | 02245230 | RANITIDINE (RANITIDINE HCL) | 02242453 |
| OLANZAPINE     | 02325683 | NITRAZEPAM    | 02229654 | RANITIDINE (RANITIDINE HCL) | 02242454 |
| OLANZAPINE     | 02372843 | NITRAZEPAM    | 00903215 | RANITIDINE (RANITIDINE HCL) | 02336480 |
| OLANZAPINE     | 02403099 | NITRAZEPAM    | 02200961 | RANITIDINE (RANITIDINE HCL) | 02336502 |
| OLANZAPINE     | 02337908 | NITRAZEPAM    | 02200988 | RANITIDINE (RANITIDINE HCL) | 02245615 |
| OLANZAPINE     | 02307448 | NITRAZEPAM    | 02255561 | RANITIDINE (RANITIDINE HCL) | 02286106 |
| OLANZAPINE     | 02310384 | NITRAZEPAM    | 02255588 | RANITIDINE (RANITIDINE HCL) | 02286114 |
| OLANZAPINE     | 02303175 | NITRAZEPAM    | 22296655 | RANITIDINE (RANITIDINE HCL) | 02303353 |
| OLANZAPINE     | 02281821 | NITRAZEPAM    | 99101127 | RANITIDINE (RANITIDINE HCL) | 02303388 |
| OLANZAPINE     | 02276747 | NITRAZEPAM    | 02245230 | RANITIDINE (RANITIDINE HCL) | 02343436 |
| OLANZAPINE     | 02229285 | NITRAZEPAM    | 02245231 | RANITIDINE (RANITIDINE HCL) | 02343444 |
| OLANZAPINE     | 02243087 | NITRAZEPAM    | 02255588 | RANITIDINE (RANITIDINE HCL) | 02353016 |
| OLANZAPINE     | 02303205 | NITRAZEPAM    | 02255561 | RANITIDINE (RANITIDINE HCL) | 02353024 |
| OLANZAPINE     | 02414104 | NITRAZEPAM    | 02234003 | RANITIDINE (RANITIDINE HCL) | 02385953 |
| OLANZAPINE     | 02321351 | NITRAZEPAM    | 02234007 | RANITIDINE (RANITIDINE HCL) | 02385961 |
| OLANZAPINE     | 02406632 | OXAZEPAM      | 02043653 | RANITIDINE (RANITIDINE HCL) | 00740748 |
| OLANZAPINE     | 02327783 | OXAZEPAM      | 00500852 | RANITIDINE (RANITIDINE HCL) | 00740756 |
| OLANZAPINE     | 02327570 | OXAZEPAM      | 00483893 | RANITIDINE (RANITIDINE HCL) | 02256711 |
| OLANZAPINE     | 02389096 | OXAZEPAM      | 00402680 | RANITIDINE (RANITIDINE HCL) | 02368005 |
| OLANZAPINE     | 02360624 | OXAZEPAM      | 00295701 | RANITIDINE (RANITIDINE HCL) | 02350203 |
| OLANZAPINE     | 02382717 | OXAZEPAM      | 00496529 | RANITIDINE (RANITIDINE HCL) | 02350211 |
| OLANZAPINE     | 02428032 | OXAZEPAM      | 00483915 | RANITIDINE (RANITIDINE HCL) | 02230003 |
| OLANZAPINE     | 02421267 | OXAZEPAM      | 00402745 | RANITIDINE (RANITIDINE HCL) | 02230004 |
| OLANZAPINE     | 02417286 | OXAZEPAM      | 00295698 | RANITIDINE (RANITIDINE HCL) | 00828688 |
| OLANZAPINE     | 02436973 | OXAZEPAM      | 02043661 | RANITIDINE (RANITIDINE HCL) | 00828823 |
| OLANZAPINE     | 02448734 | OXAZEPAM      | 02043688 | RANITIDINE (RANITIDINE HCL) | 02247814 |
| OLANZAPINE     | 02325691 | OXAZEPAM      | 00496537 | RANITIDINE (RANITIDINE HCL) | 02247815 |
| OLANZAPINE     | 02372851 | OXAZEPAM      | 00483907 | RANITIDINE (RANITIDINE HCL) | 02238579 |

Appendix 1, as supplied by the authors. Appendix to: Welk B, Killin L, Reid JN, et al. Effect of electronic medication reconciliation at the time of hospital discharge on inappropriate medication use in the community: an interrupted time series analysis. *CMAJ Open* 2021. DOI:10.9778/cmajo.20210071. Copyright © 2021 The Author(s) or their employer(s). To receive this resource in an accessible format, please contact us at [cmajgroup@cmaj.ca](mailto:cmajgroup@cmaj.ca).

|            |          |          |          |                             |          |
|------------|----------|----------|----------|-----------------------------|----------|
| OLANZAPINE | 02403102 | OXAZEPAM | 00402737 | RANITIDINE (RANITIDINE HCL) | 02243229 |
| OLANZAPINE | 02337916 | OXAZEPAM | 00231363 | RANITIDINE (RANITIDINE HCL) | 02243230 |
| OLANZAPINE | 02310392 | OXAZEPAM | 00414247 | RANITIDINE (RANITIDINE HCL) | 02241598 |
| OLANZAPINE | 02303183 | OXAZEPAM | 00414255 | RANITIDINE (RANITIDINE HCL) | 02241599 |
| OLANZAPINE | 02238850 | OXAZEPAM | 00414263 | RANITIDINE (RANITIDINE HCL) | 00828556 |
| OLANZAPINE | 02281848 | OXAZEPAM | 00497754 | RANITIDINE (RANITIDINE HCL) | 00828564 |
| OLANZAPINE | 02276755 | OXAZEPAM | 00497762 | RANITIDINE (RANITIDINE HCL) | 02231487 |
| OLANZAPINE | 02243088 | OXAZEPAM | 00497770 | RANITIDINE (RANITIDINE HCL) | 02242940 |
| OLANZAPINE | 02303213 | OXAZEPAM | 00568392 | RANITIDINE (RANITIDINE HCL) | 02229562 |
| OLANZAPINE | 02321378 | OXAZEPAM | 00568406 | RANITIDINE (RANITIDINE HCL) | 02229563 |
| OLANZAPINE | 02406640 | OXAZEPAM | 00568414 | RANITIDINE HCL              | 02367378 |
| OLANZAPINE | 02360632 | OXAZEPAM | 00702745 | RANITIDINE HCL              | 02336480 |
| OLANZAPINE | 02327791 | OXAZEPAM | 00726362 | RANITIDINE HCL              | 02243229 |
| OLANZAPINE | 02327589 | OXAZEPAM | 00726370 | RANITIDINE HCL              | 02242453 |
| OLANZAPINE | 02389118 | OXAZEPAM | 00726389 | RANITIDINE HCL              | 02241598 |
| OLANZAPINE | 02382725 | OXAZEPAM | 00903599 | RANITIDINE HCL              | 02248570 |
| OLANZAPINE | 02428040 | OXAZEPAM | 02232721 | RANITIDINE HCL              | 02230003 |
| OLANZAPINE | 02421275 | OXAZEPAM | 02232727 | RANITIDINE HCL              | 00865737 |
| OLANZAPINE | 02417294 | OXAZEPAM | 02232732 | RANITIDINE HCL              | 00828823 |
| OLANZAPINE | 02414112 | OXAZEPAM | 02247177 | RANITIDINE HCL              | 00828564 |
| OLANZAPINE | 02448742 | OXAZEPAM | 02247178 | RANITIDINE HCL              | 00733059 |
| OLANZAPINE | 02436981 | OXAZEPAM | 02247179 | RANITIDINE HCL              | 02212331 |
| OLANZAPINE | 02325659 | OXAZEPAM | 02253968 | RANITIDINE HCL              | 02207761 |
| OLANZAPINE | 02372819 | OXAZEPAM | 02253976 | RANITIDINE HCL              | 00553379 |
| OLANZAPINE | 02403064 | OXAZEPAM | 02253984 | RANITIDINE HCL              | 00905992 |
| OLANZAPINE | 02337878 | OXAZEPAM | 02294079 | RANITIDINE HCL              | 02212374 |
| OLANZAPINE | 02310341 | OXAZEPAM | 02294087 | RANITIDINE HCL              | 00782386 |
| OLANZAPINE | 02307405 | OXAZEPAM | 02294095 | RANITIDINE HCL              | 02242940 |
| OLANZAPINE | 02303116 | OXAZEPAM | 80402680 | RANITIDINE HCL              | 02280833 |
| OLANZAPINE | 02281791 | OXAZEPAM | 80402745 | RANITIDINE HCL              | 02212366 |
| OLANZAPINE | 02276712 | OXAZEPAM | 00402680 | RANITIDINE HCL              | 00603791 |
| OLANZAPINE | 02229250 | OXAZEPAM | 00402745 | RANITIDINE HCL              | 02256711 |
| OLANZAPINE | 02428008 | OXAZEPAM | 00402737 | RANITIDINE HCL              | 02243230 |
| OLANZAPINE | 02421232 | OXAZEPAM | 02247177 | RANITIDINE HCL              | 02242454 |
| OLANZAPINE | 02417243 | OXAZEPAM | 02247178 | RANITIDINE HCL              | 02241599 |
| OLANZAPINE | 02414538 | OXAZEPAM | 02247179 | RANITIDINE HCL              | 02248571 |
| OLANZAPINE | 02325667 | OXAZEPAM | 00497754 | RANITIDINE HCL              | 02230004 |
| OLANZAPINE | 02372827 | OXAZEPAM | 02232721 | RANITIDINE HCL              | 02367386 |
| OLANZAPINE | 02403072 | OXAZEPAM | 00497762 | RANITIDINE HCL              | 02336502 |
| OLANZAPINE | 02337886 | OXAZEPAM | 02232727 | RANITIDINE HCL              | 00641790 |
| OLANZAPINE | 02310368 | OXAZEPAM | 00497770 | RANITIDINE HCL              | 00865745 |
| OLANZAPINE | 02307413 | OXAZEPAM | 02232732 | RANITIDINE HCL              | 00828688 |

Appendix 1, as supplied by the authors. Appendix to: Welk B, Killin L, Reid JN, et al. Effect of electronic medication reconciliation at the time of hospital discharge on inappropriate medication use in the community: an interrupted time series analysis. *CMAJ Open* 2021. DOI:10.9778/cmajo.20210071. Copyright © 2021 The Author(s) or their employer(s). To receive this resource in an accessible format, please contact us at [cmajgroup@cmaj.ca](mailto:cmajgroup@cmaj.ca).

|            |          |           |          |                |          |
|------------|----------|-----------|----------|----------------|----------|
| OLANZAPINE | 02303159 | OXAZEPAM  | 00483915 | RANITIDINE HCL | 00828556 |
| OLANZAPINE | 02281805 | OXAZEPAM  | 00483907 | RANITIDINE HCL | 00733067 |
| OLANZAPINE | 02276720 | OXAZEPAM  | 00726362 | RANITIDINE HCL | 02212358 |
| OLANZAPINE | 02229269 | OXAZEPAM  | 00726370 | RANITIDINE HCL | 02207788 |
| OLANZAPINE | 02243086 | OXAZEPAM  | 00726389 | RANITIDINE HCL | 00191213 |
| OLANZAPINE | 02307464 | OXAZEPAM  | 00568392 | RANITIDINE HCL | 00740748 |
| OLANZAPINE | 02303191 | OXAZEPAM  | 00568406 | RANITIDINE HCL | 00849421 |
| OLANZAPINE | 02414090 | OXAZEPAM  | 00568414 | RANITIDINE HCL | 00849448 |
| OLANZAPINE | 02321343 | TEMAZEPAM | 02273039 | RANITIDINE HCL | 00990230 |
| OLANZAPINE | 02406624 | TEMAZEPAM | 02243023 | RANITIDINE HCL | 01951823 |
| OLANZAPINE | 02360616 | TEMAZEPAM | 02230095 | RANITIDINE HCL | 01951831 |
| OLANZAPINE | 02327775 | TEMAZEPAM | 02231615 | RANITIDINE HCL | 02076284 |
| OLANZAPINE | 02327562 | TEMAZEPAM | 02244814 | RANITIDINE HCL | 02076292 |
| OLANZAPINE | 02389088 | TEMAZEPAM | 02229455 | RANITIDINE HCL | 02212382 |
| OLANZAPINE | 02382709 | TEMAZEPAM | 00604453 | RANITIDINE HCL | 02213397 |
| OLANZAPINE | 02428016 | TEMAZEPAM | 02225964 | RANITIDINE HCL | 02213494 |
| OLANZAPINE | 02421240 | TEMAZEPAM | 02223570 | RANITIDINE HCL | 02213508 |
| OLANZAPINE | 02417251 | TEMAZEPAM | 02225972 | RANITIDINE HCL | 02213516 |
| OLANZAPINE | 02436965 | TEMAZEPAM | 02223589 | RANITIDINE HCL | 02213524 |
| OLANZAPINE | 02325675 | TEMAZEPAM | 00604461 | RANITIDINE HCL | 02219077 |
| OLANZAPINE | 02372835 | TEMAZEPAM | 02273047 | RANITIDINE HCL | 02219085 |
| OLANZAPINE | 02403080 | TEMAZEPAM | 02243024 | RANITIDINE HCL | 02229562 |
| OLANZAPINE | 02337894 | TEMAZEPAM | 02230102 | RANITIDINE HCL | 02229563 |
| OLANZAPINE | 02310376 | TEMAZEPAM | 02231616 | RANITIDINE HCL | 02230287 |
| OLANZAPINE | 02303167 | TEMAZEPAM | 02244815 | RANITIDINE HCL | 02230507 |
| OLANZAPINE | 02281813 | TEMAZEPAM | 02229456 | RANITIDINE HCL | 02231487 |
| OLANZAPINE | 02276739 | TEMAZEPAM | 00513881 | RANITIDINE HCL | 02237829 |
| OLANZAPINE | 02229277 | TEMAZEPAM | 00518166 | RANITIDINE HCL | 02238579 |
| OLANZAPINE | 02428024 | TEMAZEPAM | 02229756 | RANITIDINE HCL | 02238893 |
| OLANZAPINE | 02421259 | TEMAZEPAM | 02229758 | RANITIDINE HCL | 02241208 |
| OLANZAPINE | 02417278 | TEMAZEPAM | 02229760 | RANITIDINE HCL | 02241422 |
| OLANZAPINE | 02238851 | TEMAZEPAM | 02229761 | RANITIDINE HCL | 02241597 |
| OLANZAPINE | 02243089 | TEMAZEPAM | 02229854 | RANITIDINE HCL | 02242056 |
| OLANZAPINE | 02247099 | TEMAZEPAM | 02230101 | RANITIDINE HCL | 02242057 |
| OLANZAPINE | 02301016 | TEMAZEPAM | 02237294 | RANITIDINE HCL | 02242058 |
| OLANZAPINE | 02301024 | TEMAZEPAM | 02237295 | RANITIDINE HCL | 02243038 |
| OLANZAPINE | 02301032 | TEMAZEPAM | 02239071 | RANITIDINE HCL | 02243039 |
| OLANZAPINE | 02301040 | TEMAZEPAM | 02239072 | RANITIDINE HCL | 02245615 |
| OLANZAPINE | 02301059 | TEMAZEPAM | 02243624 | RANITIDINE HCL | 02245782 |
| OLANZAPINE | 02307324 | TEMAZEPAM | 02247526 | RANITIDINE HCL | 02245783 |
| OLANZAPINE | 02307332 | TEMAZEPAM | 02247527 | RANITIDINE HCL | 02246167 |
| OLANZAPINE | 02307340 | TEMAZEPAM | 02253070 | RANITIDINE HCL | 02246168 |

Appendix 1, as supplied by the authors. Appendix to: Welk B, Killin L, Reid JN, et al. Effect of electronic medication reconciliation at the time of hospital discharge on inappropriate medication use in the community: an interrupted time series analysis. *CMAJ Open* 2021. DOI:10.9778/cmajo.20210071. Copyright © 2021 The Author(s) or their employer(s). To receive this resource in an accessible format, please contact us at [cmajgroup@cmaj.ca](mailto:cmajgroup@cmaj.ca).

|            |          |           |          |                |          |
|------------|----------|-----------|----------|----------------|----------|
| OLANZAPINE | 02307359 | TEMAZEPAM | 02253089 | RANITIDINE HCL | 02247551 |
| OLANZAPINE | 02307367 | TEMAZEPAM | 02297957 | RANITIDINE HCL | 02247814 |
| OLANZAPINE | 02307375 | TEMAZEPAM | 02297965 | RANITIDINE HCL | 02247815 |
| OLANZAPINE | 02307383 | TEMAZEPAM | 02347865 | RANITIDINE HCL | 02265591 |
| OLANZAPINE | 02307391 | TEMAZEPAM | 02347873 | RANITIDINE HCL | 02265605 |
| OLANZAPINE | 02307421 | TEMAZEPAM | 06022235 | RANITIDINE HCL | 02266806 |
| OLANZAPINE | 02307456 | TEMAZEPAM | 22123262 | RANITIDINE HCL | 02277301 |
| OLANZAPINE | 02307472 | TEMAZEPAM | 99101293 | RANITIDINE HCL | 02284022 |
| OLANZAPINE | 02307480 | TEMAZEPAM | 02244814 | RANITIDINE HCL | 02286106 |
| OLANZAPINE | 02310015 | TEMAZEPAM | 02244815 | RANITIDINE HCL | 02286114 |
| OLANZAPINE | 02310031 | TEMAZEPAM | 02229756 | RANITIDINE HCL | 02291282 |
| OLANZAPINE | 02310058 | TEMAZEPAM | 02229758 | RANITIDINE HCL | 02293471 |
| OLANZAPINE | 02310082 | TEMAZEPAM | 02231615 | RANITIDINE HCL | 02296160 |
| OLANZAPINE | 02310090 | TEMAZEPAM | 02231616 | RANITIDINE HCL | 02298740 |
| OLANZAPINE | 02310406 | TEMAZEPAM | 02347865 | RANITIDINE HCL | 02298902 |
| OLANZAPINE | 02311968 | TEMAZEPAM | 02347873 | RANITIDINE HCL | 02303221 |
| OLANZAPINE | 02311976 | TEMAZEPAM | 02223570 | RANITIDINE HCL | 02303353 |
| OLANZAPINE | 02311984 | TEMAZEPAM | 02223589 | RANITIDINE HCL | 02303388 |
| OLANZAPINE | 02311992 | TEMAZEPAM | 02239071 | RANITIDINE HCL | 02323699 |
| OLANZAPINE | 02312018 | TEMAZEPAM | 02239072 | RANITIDINE HCL | 02323702 |
| OLANZAPINE | 02321386 | TEMAZEPAM | 02297957 | RANITIDINE HCL | 02327244 |
| OLANZAPINE | 02325713 | TEMAZEPAM | 02297965 | RANITIDINE HCL | 02327252 |
| OLANZAPINE | 02327597 | TEMAZEPAM | 02273039 | RANITIDINE HCL | 02342871 |
| OLANZAPINE | 02327805 | TEMAZEPAM | 02273047 | RANITIDINE HCL | 02342898 |
| OLANZAPINE | 02333015 | TEMAZEPAM | 02229455 | RANITIDINE HCL | 02343436 |
| OLANZAPINE | 02337126 | TEMAZEPAM | 02229456 | RANITIDINE HCL | 02343444 |
| OLANZAPINE | 02337134 | TEMAZEPAM | 02243023 | RANITIDINE HCL | 02350203 |
| OLANZAPINE | 02337142 | TEMAZEPAM | 02243024 | RANITIDINE HCL | 02350211 |
| OLANZAPINE | 02337150 | TEMAZEPAM | 02225964 | RANITIDINE HCL | 02353016 |
| OLANZAPINE | 02337169 | TEMAZEPAM | 02225972 | RANITIDINE HCL | 02353024 |
| OLANZAPINE | 02337924 | TEMAZEPAM | 02229760 | RANITIDINE HCL | 02363526 |
| OLANZAPINE | 02338211 | TEMAZEPAM | 02229761 | RANITIDINE HCL | 02368005 |
| OLANZAPINE | 02338238 | TEMAZEPAM | 02230095 | RANITIDINE HCL | 02385953 |
| OLANZAPINE | 02338246 | TEMAZEPAM | 02230102 | RANITIDINE HCL | 02400103 |
| OLANZAPINE | 02338254 | TRIAZOLAM | 00512559 | RANITIDINE HCL | 02443708 |
| OLANZAPINE | 02338262 | TRIAZOLAM | 00614351 | RANITIDINE HCL | 02443716 |
| OLANZAPINE | 02338270 | TRIAZOLAM | 01995227 | RANITIDINE HCL | 02463717 |
| OLANZAPINE | 02338289 | TRIAZOLAM | 00808563 | RANITIDINE HCL | 02463725 |
| OLANZAPINE | 02338297 | TRIAZOLAM | 00886084 | RANITIDINE HCL | 09991036 |
| OLANZAPINE | 02338300 | TRIAZOLAM | 02230024 | RANITIDINE HCL | 22123159 |
| OLANZAPINE | 02338319 | TRIAZOLAM | 02230025 | RANITIDINE HCL | 49828564 |
| OLANZAPINE | 02338645 | TRIAZOLAM | 00808571 | RANITIDINE HCL | 80000219 |

Appendix 1, as supplied by the authors. Appendix to: Welk B, Killin L, Reid JN, et al. Effect of electronic medication reconciliation at the time of hospital discharge on inappropriate medication use in the community: an interrupted time series analysis. *CMAJ Open* 2021. DOI:10.9778/cmajo.20210071. Copyright © 2021 The Author(s) or their employer(s). To receive this resource in an accessible format, please contact us at [cmajgroup@cmaj.ca](mailto:cmajgroup@cmaj.ca).

|            |          |           |          |                |          |
|------------|----------|-----------|----------|----------------|----------|
| OLANZAPINE | 02338653 | TRIAZOLAM | 00886092 | RANITIDINE HCL | 99100771 |
| OLANZAPINE | 02338661 | TRIAZOLAM | 00872431 | RANITIDINE HCL | 99100772 |
| OLANZAPINE | 02339811 | TRIAZOLAM | 01913506 | RANITIDINE HCL | 99101171 |
| OLANZAPINE | 02339838 | TRIAZOLAM | 00443158 | RANITIDINE HCL | 99101172 |
| OLANZAPINE | 02339846 | TRIAZOLAM | 00614378 | RANITIDINE HCL | 02219077 |
| OLANZAPINE | 02343665 | TRIAZOLAM | 00443123 |                |          |
| OLANZAPINE | 02343673 | TRIAZOLAM | 00443131 |                |          |
| OLANZAPINE | 02343681 | TRIAZOLAM | 00860816 |                |          |
| OLANZAPINE | 02343703 | TRIAZOLAM | 00860824 |                |          |
| OLANZAPINE | 02343827 | TRIAZOLAM | 00872423 |                |          |
| OLANZAPINE | 02343835 | TRIAZOLAM | 02084406 |                |          |
| OLANZAPINE | 02343843 | TRIAZOLAM | 02084414 |                |          |
| OLANZAPINE | 02343851 | TRIAZOLAM | 02232553 |                |          |
| OLANZAPINE | 02343878 | TRIAZOLAM | 02232554 |                |          |
| OLANZAPINE | 02343886 | TRIAZOLAM | 05019135 |                |          |
| OLANZAPINE | 02346044 | TRIAZOLAM | 99100774 |                |          |
| OLANZAPINE | 02346052 | TRIAZOLAM | 99100775 |                |          |
| OLANZAPINE | 02346060 | TRIAZOLAM | 00614351 |                |          |
| OLANZAPINE | 02346079 | TRIAZOLAM | 00614378 |                |          |
| OLANZAPINE | 02346087 | TRIAZOLAM | 01913506 |                |          |
| OLANZAPINE | 02348101 | TRIAZOLAM | 01995227 |                |          |
| OLANZAPINE | 02348128 | TRIAZOLAM | 02232553 |                |          |
| OLANZAPINE | 02348136 | TRIAZOLAM | 02232554 |                |          |
| OLANZAPINE | 02348144 | TRIAZOLAM | 00808563 |                |          |
| OLANZAPINE | 02348152 | TRIAZOLAM | 00808571 |                |          |
| OLANZAPINE | 02348160 | TRIAZOLAM | 00860816 |                |          |
| OLANZAPINE | 02348179 | TRIAZOLAM | 00860824 |                |          |
| OLANZAPINE | 02348187 | TRIAZOLAM | 02230024 |                |          |
| OLANZAPINE | 02352974 | TRIAZOLAM | 02230025 |                |          |
| OLANZAPINE | 02352982 | ZALEPLON  | 02242219 |                |          |
| OLANZAPINE | 02352990 | ZALEPLON  | 02242220 |                |          |
| OLANZAPINE | 02353008 | ZALEPLON  | 02297124 |                |          |
| OLANZAPINE | 02359707 | ZALEPLON  | 02297132 |                |          |
| OLANZAPINE | 02360640 | ZALEPLON  | 09991096 |                |          |
| OLANZAPINE | 02367483 | ZALEPLON  | 02242219 |                |          |
| OLANZAPINE | 02372717 | ZALEPLON  | 02242220 |                |          |
| OLANZAPINE | 02373432 | ZALEPLON  | 02297124 |                |          |
| OLANZAPINE | 02373440 | ZALEPLON  | 02297132 |                |          |
| OLANZAPINE | 02373459 |           |          |                |          |
| OLANZAPINE | 02373467 |           |          |                |          |
| OLANZAPINE | 02373475 |           |          |                |          |
| OLANZAPINE | 02376229 |           |          |                |          |

Appendix 1, as supplied by the authors. Appendix to: Welk B, Killin L, Reid JN, et al. Effect of electronic medication reconciliation at the time of hospital discharge on inappropriate medication use in the community: an interrupted time series analysis. *CMAJ Open* 2021. DOI:10.9778/cmajo.20210071. Copyright © 2021 The Author(s) or their employer(s). To receive this resource in an accessible format, please contact us at [cmajgroup@cmaj.ca](mailto:cmajgroup@cmaj.ca).

|            |          |
|------------|----------|
| OLANZAPINE | 02376237 |
| OLANZAPINE | 02382733 |
| OLANZAPINE | 02385864 |
| OLANZAPINE | 02385872 |
| OLANZAPINE | 02385880 |
| OLANZAPINE | 02385899 |
| OLANZAPINE | 02385902 |
| OLANZAPINE | 02389126 |
| OLANZAPINE | 02392399 |
| OLANZAPINE | 02406659 |
| OLANZAPINE | 02410176 |
| OLANZAPINE | 02414120 |
| OLANZAPINE | 02414554 |
| OLANZAPINE | 02414562 |
| OLANZAPINE | 02416522 |
| OLANZAPINE | 02417308 |
| OLANZAPINE | 02420538 |
| OLANZAPINE | 02420546 |
| OLANZAPINE | 02420554 |
| OLANZAPINE | 02420562 |
| OLANZAPINE | 02420570 |
| OLANZAPINE | 02421704 |
| OLANZAPINE | 02423944 |
| OLANZAPINE | 02425114 |
| OLANZAPINE | 02437007 |
| OLANZAPINE | 02448750 |
| OLANZAPINE | 82229250 |
| OLANZAPINE | 82229269 |
| OLANZAPINE | 82243086 |
| OLANZAPINE | 82243087 |
| OLANZAPINE | 99400918 |
| OLANZAPINE | 02301016 |
| OLANZAPINE | 02301024 |
| OLANZAPINE | 02301032 |
| OLANZAPINE | 02301040 |
| OLANZAPINE | 02301059 |
| OLANZAPINE | 02311968 |
| OLANZAPINE | 02311976 |
| OLANZAPINE | 02311984 |
| OLANZAPINE | 02311992 |
| OLANZAPINE | 02312018 |
| OLANZAPINE | 02343827 |

Appendix 1, as supplied by the authors. Appendix to: Welk B, Killin L, Reid JN, et al. Effect of electronic medication reconciliation at the time of hospital discharge on inappropriate medication use in the community: an interrupted time series analysis. *CMAJ Open* 2021. DOI:10.9778/cmajo.20210071. Copyright © 2021 The Author(s) or their employer(s). To receive this resource in an accessible format, please contact us at [cmajgroup@cmaj.ca](mailto:cmajgroup@cmaj.ca).



|                          |          |
|--------------------------|----------|
| OLANZAPINE               | 02343835 |
| OLANZAPINE               | 02343843 |
| OLANZAPINE               | 02343851 |
| OLANZAPINE               | 02343878 |
| OLANZAPINE               | 02343886 |
| OLANZAPINE               | 02348101 |
| OLANZAPINE               | 02348128 |
| OLANZAPINE               | 02348136 |
| OLANZAPINE               | 02348144 |
| OLANZAPINE               | 02348152 |
| OLANZAPINE               | 02372819 |
| OLANZAPINE               | 02372827 |
| OLANZAPINE               | 02372835 |
| OLANZAPINE               | 02372843 |
| OLANZAPINE               | 02372851 |
| OLANZAPINE               | 02385864 |
| OLANZAPINE               | 02385872 |
| OLANZAPINE               | 02385880 |
| OLANZAPINE               | 02385899 |
| OLANZAPINE               | 02385902 |
| OLANZAPINE               | 02385910 |
| OLANZAPINE               | 02419386 |
| OLANZAPINE               | 02419394 |
| OLANZAPINE               | 02419408 |
| OLANZAPINE               | 02419416 |
| OLANZAPINE               | 02419424 |
| OLANZAPINE               | 02419432 |
| OLANZAPINE               | 02421704 |
| OLANZAPINE FOR INJECTION | 02416522 |
| OLANZAPINE ODT           | 02338645 |
| OLANZAPINE ODT           | 02338653 |
| OLANZAPINE ODT           | 02338661 |
| OLANZAPINE ODT           | 02343665 |
| OLANZAPINE ODT           | 02343673 |
| OLANZAPINE ODT           | 02343681 |
| OLANZAPINE ODT           | 02343703 |
| OLANZAPINE ODT           | 02348160 |
| OLANZAPINE ODT           | 02348179 |
| OLANZAPINE ODT           | 02348187 |
| OLANZAPINE ODT           | 02352974 |
| OLANZAPINE ODT           | 02352982 |
| OLANZAPINE ODT           | 02352990 |

Appendix 1, as supplied by the authors. Appendix to: Welk B, Killin L, Reid JN, et al. Effect of electronic medication reconciliation at the time of hospital discharge on inappropriate medication use in the community: an interrupted time series analysis. *CMAJ Open* 2021. DOI:10.9778/cmajo.20210071. Copyright © 2021 The Author(s) or their employer(s). To receive this resource in an accessible format, please contact us at [cmajgroup@cmaj.ca](mailto:cmajgroup@cmaj.ca).

|                                       |          |
|---------------------------------------|----------|
| OLANZAPINE ODT                        | 02353008 |
| OLANZAPINE ODT                        | 02425114 |
| OLANZAPINE-ODT                        | 02430444 |
| OLANZAPINE-ODT                        | 02430452 |
| OLANZAPINE-ODT                        | 02430460 |
| OLANZAPINE-ODT                        | 02430479 |
| PALIPERIDONE                          | 02300273 |
| PALIPERIDONE                          | 02300281 |
| PALIPERIDONE                          | 02300303 |
| PALIPERIDONE                          | 02300311 |
| PALIPERIDONE                          | 02331276 |
| PALIPERIDONE (PALIPERIDONE PALMITATE) | 02354209 |
| PALIPERIDONE (PALIPERIDONE PALMITATE) | 02354217 |
| PALIPERIDONE (PALIPERIDONE PALMITATE) | 02354225 |
| PALIPERIDONE (PALIPERIDONE PALMITATE) | 02354233 |
| PALIPERIDONE (PALIPERIDONE PALMITATE) | 02354241 |
| PALIPERIDONE (PALIPERIDONE PALMITATE) | 02455943 |
| PALIPERIDONE (PALIPERIDONE PALMITATE) | 02455986 |
| PALIPERIDONE (PALIPERIDONE PALMITATE) | 02455994 |
| PALIPERIDONE (PALIPERIDONE PALMITATE) | 02456001 |
| PALIPERIDONE PALMITATE                | 02354233 |
| PALIPERIDONE PALMITATE                | 02354241 |
| PALIPERIDONE PALMITATE                | 02455943 |
| PALIPERIDONE PALMITATE                | 02455986 |
| PALIPERIDONE PALMITATE                | 02455994 |
| PALIPERIDONE PALMITATE                | 02354217 |
| PALIPERIDONE PALMITATE                | 02456001 |
| PALIPERIDONE PALMITATE                | 02354225 |
| PALIPERIDONE PALMITATE                | 02354209 |
| PERICIAZINE                           | 01926772 |
| PERICIAZINE                           | 00024899 |
| PERICIAZINE                           | 00379301 |
| PERICIAZINE                           | 01926756 |
| PERICIAZINE                           | 01926780 |
| PERICIAZINE                           | 00024880 |
| PERICIAZINE                           | 00379328 |
| PERICIAZINE                           | 00926772 |
| PERICIAZINE                           | 01926764 |
| PERICIAZINE                           | 01926756 |
| PERICIAZINE                           | 01926764 |
| PERICIAZINE                           | 01926772 |
| PERICIAZINE                           | 01926780 |

Appendix 1, as supplied by the authors. Appendix to: Welk B, Killin L, Reid JN, et al. Effect of electronic medication reconciliation at the time of hospital discharge on inappropriate medication use in the community: an interrupted time series analysis. *CMAJ Open* 2021. DOI:10.9778/cmajo.20210071. Copyright © 2021 The Author(s) or their employer(s). To receive this resource in an accessible format, please contact us at [cmajgroup@cmaj.ca](mailto:cmajgroup@cmaj.ca).

|              |          |
|--------------|----------|
| PERICYAZINE  | 02237603 |
| PERICYAZINE  | 02237604 |
| PERICYAZINE  | 02237605 |
| PERICYAZINE  | 02237606 |
| PERPHENAZINE | 00481920 |
| PERPHENAZINE | 00335096 |
| PERPHENAZINE | 00028320 |
| PERPHENAZINE | 00028169 |
| PERPHENAZINE | 00456039 |
| PERPHENAZINE | 00335134 |
| PERPHENAZINE | 00028290 |
| PERPHENAZINE | 00028150 |
| PERPHENAZINE | 00456047 |
| PERPHENAZINE | 00335126 |
| PERPHENAZINE | 00028304 |
| PERPHENAZINE | 00028002 |
| PERPHENAZINE | 00456055 |
| PERPHENAZINE | 00335118 |
| PERPHENAZINE | 00028312 |
| PERPHENAZINE | 00294799 |
| PERPHENAZINE | 00294802 |
| PERPHENAZINE | 00296309 |
| PERPHENAZINE | 00296317 |
| PERPHENAZINE | 00563722 |
| PERPHENAZINE | 00563730 |
| PERPHENAZINE | 00563749 |
| PERPHENAZINE | 00563757 |
| PERPHENAZINE | 00726184 |
| PERPHENAZINE | 00726192 |
| PERPHENAZINE | 00726206 |
| PERPHENAZINE | 00726281 |
| PERPHENAZINE | 00751898 |
| PERPHENAZINE | 66124095 |
| PERPHENAZINE | 66124096 |
| PERPHENAZINE | 99100719 |
| PERPHENAZINE | 99100720 |
| PERPHENAZINE | 99100721 |
| PERPHENAZINE | 99100722 |
| PERPHENAZINE | 99101199 |
| PERPHENAZINE | 99101200 |
| PERPHENAZINE | 00335096 |
| PERPHENAZINE | 00335118 |

Appendix 1, as supplied by the authors. Appendix to: Welk B, Killin L, Reid JN, et al. Effect of electronic medication reconciliation at the time of hospital discharge on inappropriate medication use in the community: an interrupted time series analysis. *CMAJ Open* 2021. DOI:10.9778/cmajo.20210071. Copyright © 2021 The Author(s) or their employer(s). To receive this resource in an accessible format, please contact us at [cmajgroup@cmaj.ca](mailto:cmajgroup@cmaj.ca).

|                        |          |
|------------------------|----------|
| PERPHENAZINE           | 00335126 |
| PERPHENAZINE           | 00335134 |
| PERPHENAZINE 16 TAB    | 00563722 |
| PERPHENAZINE 2 TAB 2MG | 00563757 |
| PERPHENAZINE 8 TAB 8MG | 00563730 |
| PERPHENAZINE TAB 2MG   | 00456039 |
| PERPHENAZINE TAB 4MG   | 00456047 |
| PERPHENAZINE TAB 4MG   | 00563749 |
| PHL-LOXAPINE           | 02236943 |
| PHL-LOXAPINE           | 02236944 |
| PHL-LOXAPINE           | 02236945 |
| PHL-LOXAPINE           | 02236946 |
| PHL-LOXAPINE           | 02255448 |
| PHL-LOXAPINE           | 02255456 |
| PHL-OLANZAPINE         | 02307405 |
| PHL-OLANZAPINE         | 02307413 |
| PHL-OLANZAPINE         | 02307421 |
| PHL-OLANZAPINE         | 02307448 |
| PHL-OLANZAPINE         | 02307456 |
| PHL-OLANZAPINE ODT     | 02307464 |
| PHL-OLANZAPINE ODT     | 02307472 |
| PHL-OLANZAPINE ODT     | 02307480 |
| PHL-RISPERIDONE        | 02258439 |
| PHL-RISPERIDONE        | 02258447 |
| PHL-RISPERIDONE        | 02258455 |
| PHL-RISPERIDONE        | 02258463 |
| PHL-RISPERIDONE        | 02258471 |
| PHL-RISPERIDONE        | 02258498 |
| PHL-RISPERIDONE ODT    | 02294435 |
| PHL-RISPERIDONE ODT    | 02294443 |
| PHL-RISPERIDONE ODT    | 02294451 |
| PIMOZIDE               | 00573817 |
| PIMOZIDE               | 00313815 |
| PIMOZIDE               | 02245432 |
| PIMOZIDE               | 02245433 |
| PIMOZIDE               | 00313823 |
| PIMOZIDE               | 02239829 |
| PIMOZIDE               | 02239830 |
| PIMOZIDE               | 02239831 |
| PIMOZIDE               | 99100767 |
| PIMOZIDE               | 02245432 |
| PIMOZIDE               | 02245433 |

Appendix 1, as supplied by the authors. Appendix to: Welk B, Killin L, Reid JN, et al. Effect of electronic medication reconciliation at the time of hospital discharge on inappropriate medication use in the community: an interrupted time series analysis. *CMAJ Open* 2021. DOI:10.9778/cmajo.20210071. Copyright © 2021 The Author(s) or their employer(s). To receive this resource in an accessible format, please contact us at [cmajgroup@cmaj.ca](mailto:cmajgroup@cmaj.ca).

|                                             |          |
|---------------------------------------------|----------|
| PIPOTIAZINE PALMITATE                       | 00427918 |
| PIPOTIAZINE PALMITATE                       | 01926667 |
| PIPOTIAZINE PALMITATE                       | 00427926 |
| PIPOTIAZINE PALMITATE                       | 00990507 |
| PIPOTIAZINE PALMITATE                       | 01926675 |
| PIPOTIAZINE PALMITATE                       | 00894672 |
| PIPOTIAZINE PALMITATE                       | 02236468 |
| PIPOTIAZINE PALMITATE                       | 02236471 |
| PIPOTIAZINE PALMITATE                       | 01926667 |
| PIPOTIAZINE PALMITATE                       | 01926675 |
| PMS PERPHENAZINE CONCENTRATE LIQ 3.2MG/ML   | 00751898 |
| PMS PERPHENAZINE TAB 16MG                   | 00726206 |
| PMS PERPHENAZINE TAB 2MG                    | 00726184 |
| PMS PERPHENAZINE TAB 4MG                    | 00726192 |
| PMS PERPHENAZINE TAB 8MG                    | 00726281 |
| PMS PROCHLORPERAZINE INJ 5MG/ML             | 00753645 |
| PMS TRIFLUOPERAZINE HCL SYRUP 11.8MG/ML     | 00751871 |
| PMS TRIFLUOPERAZINE TAB 10MG                | 00726249 |
| PMS TRIFLUOPERAZINE TAB 1MG                 | 00726214 |
| PMS TRIFLUOPERAZINE TAB 20MG                | 00726257 |
| PMS TRIFLUOPERAZINE TAB 2MG                 | 00726222 |
| PMS TRIFLUOPERAZINE TAB 5MG                 | 00726230 |
| PMS-ARIPIRAZOLE                             | 02466635 |
| PMS-ARIPIRAZOLE                             | 02466643 |
| PMS-ARIPIRAZOLE                             | 02466651 |
| PMS-ARIPIRAZOLE                             | 02466678 |
| PMS-ARIPIRAZOLE                             | 02466686 |
| PMS-ARIPIRAZOLE                             | 02466694 |
| PMS-CLOZAPINE                               | 02240668 |
| PMS-CLOZAPINE                               | 02240669 |
| PMS-FLUPHENAZINE DECANOATE                  | 02241928 |
| PMS-FLUPHENAZINE DECANOATE INJ (BP) 25MG/ML | 02091275 |
| PMS-HALOPERIDOL SOLN 2MG/ML                 | 00759503 |
| PMS-HALOPERIDOL-LA                          | 02230707 |
| PMS-HALOPERIDOL-LA                          | 02230708 |
| PMS-METHOTRIMEPRAZINE                       | 02232903 |
| PMS-METHOTRIMEPRAZINE                       | 02232904 |
| PMS-METHOTRIMEPRAZINE                       | 02232905 |
| PMS-OLANZAPINE                              | 02303116 |
| PMS-OLANZAPINE                              | 02303159 |
| PMS-OLANZAPINE                              | 02303167 |
| PMS-OLANZAPINE                              | 02303175 |

Appendix 1, as supplied by the authors. Appendix to: Welk B, Killin L, Reid JN, et al. Effect of electronic medication reconciliation at the time of hospital discharge on inappropriate medication use in the community: an interrupted time series analysis. *CMAJ Open* 2021. DOI:10.9778/cmajo.20210071. Copyright © 2021 The Author(s) or their employer(s). To receive this resource in an accessible format, please contact us at [cmajgroup@cmaj.ca](mailto:cmajgroup@cmaj.ca).

|                                         |          |
|-----------------------------------------|----------|
| PMS-OLANZAPINE                          | 02303183 |
| PMS-OLANZAPINE                          | 02367483 |
| PMS-OLANZAPINE ODT                      | 02303191 |
| PMS-OLANZAPINE ODT                      | 02303205 |
| PMS-OLANZAPINE ODT                      | 02303213 |
| PMS-OLANZAPINE ODT                      | 02423944 |
| PMS-PIMOZIDE                            | 02239829 |
| PMS-PIMOZIDE                            | 02239830 |
| PMS-PIMOZIDE                            | 02239831 |
| PMS-PROCHLORPERAZINE SUPPOSITOIRES 10MG | 00753688 |
| PMS-PROCHLORPERAZINE TAB 10MG           | 00753637 |
| PMS-PROCHLORPERAZINE TAB 5MG            | 00753661 |
| PMS-RISPERIDONE                         | 02252007 |
| PMS-RISPERIDONE                         | 02252015 |
| PMS-RISPERIDONE                         | 02252023 |
| PMS-RISPERIDONE                         | 02252031 |
| PMS-RISPERIDONE                         | 02252058 |
| PMS-RISPERIDONE                         | 02252066 |
| PMS-RISPERIDONE                         | 02279266 |
| PMS-RISPERIDONE ODT                     | 02291770 |
| PMS-RISPERIDONE ODT                     | 02291789 |
| PMS-RISPERIDONE ODT                     | 02291797 |
| PMS-RISPERIDONE ODT                     | 02370697 |
| PMS-RISPERIDONE ODT                     | 02370700 |
| PMS-TRIFLUOPERAZINE HCL SYR 1.18MG/ML   | 00776505 |
| PROCHLORPERAZINE                        | 01927795 |
| PROCHLORPERAZINE                        | 00789720 |
| PROCHLORPERAZINE                        | 00753688 |
| PROCHLORPERAZINE                        | 00025364 |
| PROCHLORPERAZINE                        | 00789747 |
| PROCHLORPERAZINE                        | 00025356 |
| PROCHLORPERAZINE                        | 00753645 |
| PROCHLORPERAZINE                        | 00777803 |
| PROCHLORPERAZINE                        | 00809179 |
| PROCHLORPERAZINE                        | 09991048 |
| PROCHLORPERAZINE MESYLATE               | 01927779 |
| PROCHLORPERAZINE MESYLATE               | 00578185 |
| PROCHLORPERAZINE MESYLATE               | 00025216 |
| PROCHLORPERAZINE MESYLATE               | 01927787 |
| PROCHLORPERAZINE MESYLATE               | 00025100 |
| PROCHLORPERAZINE MESYLATE               | 00753653 |
| PROCHLORPERAZINE MESYLATE INJ 5MG/ML    | 00789747 |

Appendix 1, as supplied by the authors. Appendix to: Welk B, Killin L, Reid JN, et al. Effect of electronic medication reconciliation at the time of hospital discharge on inappropriate medication use in the community: an interrupted time series analysis. *CMAJ Open* 2021. DOI:10.9778/cmajo.20210071. Copyright © 2021 The Author(s) or their employer(s). To receive this resource in an accessible format, please contact us at [cmajgroup@cmaj.ca](mailto:cmajgroup@cmaj.ca).

|                           |          |
|---------------------------|----------|
| PROMAZINE                 | 00093580 |
| PROMAZINE                 | 00093599 |
| PROMAZINE HCL             | 00017124 |
| PROMAZINE HCL             | 00017132 |
| PROMAZINE HCL             | 00017140 |
| PROMAZINE HCL             | 00030066 |
| PROMAZINE HCL             | 00034088 |
| PROMAZINE HCL             | 00034177 |
| PROMAZINE HCL             | 00034185 |
| PROMAZINE HCL             | 00289612 |
| PROMAZINE HCL             | 00497509 |
| PROMAZINE HCL INJ 50MG/ML | 00497509 |
| PRO-RISPERIDONE           | 02312700 |
| PRO-RISPERIDONE           | 02312719 |
| PRO-RISPERIDONE           | 02312727 |
| PRO-RISPERIDONE           | 02312735 |
| PRO-RISPERIDONE           | 02312743 |
| PRO-RISPERIDONE           | 02312751 |
| Q-RISPERIDONE             | 02372622 |
| Q-RISPERIDONE             | 02372630 |
| Q-RISPERIDONE             | 02372649 |
| Q-RISPERIDONE             | 02372657 |
| Q-RISPERIDONE             | 02372665 |
| Q-RISPERIDONE             | 02372673 |
| QUETIAPINE                | 02353202 |
| QUETIAPINE FUMARATE       | 02330423 |
| QUETIAPINE FUMARATE       | 02399830 |
| QUETIAPINE FUMARATE       | 02397102 |
| QUETIAPINE FUMARATE       | 02390213 |
| QUETIAPINE FUMARATE       | 02387808 |
| QUETIAPINE FUMARATE       | 02438011 |
| QUETIAPINE FUMARATE       | 02236952 |
| QUETIAPINE FUMARATE       | 02311712 |
| QUETIAPINE FUMARATE       | 02317907 |
| QUETIAPINE FUMARATE       | 02316099 |
| QUETIAPINE FUMARATE       | 02313928 |
| QUETIAPINE FUMARATE       | 02314002 |
| QUETIAPINE FUMARATE       | 02307812 |
| QUETIAPINE FUMARATE       | 02299062 |
| QUETIAPINE FUMARATE       | 02296578 |
| QUETIAPINE FUMARATE       | 02284243 |
| QUETIAPINE FUMARATE       | 02434032 |

Appendix 1, as supplied by the authors. Appendix to: Welk B, Killin L, Reid JN, et al. Effect of electronic medication reconciliation at the time of hospital discharge on inappropriate medication use in the community: an interrupted time series analysis. *CMAJ Open* 2021. DOI:10.9778/cmajo.20210071. Copyright © 2021 The Author(s) or their employer(s). To receive this resource in an accessible format, please contact us at [cmajgroup@cmaj.ca](mailto:cmajgroup@cmaj.ca).

|                     |          |
|---------------------|----------|
| QUETIAPINE FUMARATE | 02439166 |
| QUETIAPINE FUMARATE | 02457237 |
| QUETIAPINE FUMARATE | 02407698 |
| QUETIAPINE FUMARATE | 02240862 |
| QUETIAPINE FUMARATE | 02321513 |
| QUETIAPINE FUMARATE | 02395452 |
| QUETIAPINE FUMARATE | 02457245 |
| QUETIAPINE FUMARATE | 02438046 |
| QUETIAPINE FUMARATE | 02412993 |
| QUETIAPINE FUMARATE | 02407701 |
| QUETIAPINE FUMARATE | 02353199 |
| QUETIAPINE FUMARATE | 02330458 |
| QUETIAPINE FUMARATE | 02399849 |
| QUETIAPINE FUMARATE | 02397110 |
| QUETIAPINE FUMARATE | 02390248 |
| QUETIAPINE FUMARATE | 02387824 |
| QUETIAPINE FUMARATE | 02236953 |
| QUETIAPINE FUMARATE | 02317923 |
| QUETIAPINE FUMARATE | 02316110 |
| QUETIAPINE FUMARATE | 02314010 |
| QUETIAPINE FUMARATE | 02313936 |
| QUETIAPINE FUMARATE | 02311747 |
| QUETIAPINE FUMARATE | 02307839 |
| QUETIAPINE FUMARATE | 02296594 |
| QUETIAPINE FUMARATE | 02284278 |
| QUETIAPINE FUMARATE | 02300192 |
| QUETIAPINE FUMARATE | 02395460 |
| QUETIAPINE FUMARATE | 02434040 |
| QUETIAPINE FUMARATE | 02439182 |
| QUETIAPINE FUMARATE | 02412977 |
| QUETIAPINE FUMARATE | 02353164 |
| QUETIAPINE FUMARATE | 02330415 |
| QUETIAPINE FUMARATE | 02399822 |
| QUETIAPINE FUMARATE | 02397099 |
| QUETIAPINE FUMARATE | 02390205 |
| QUETIAPINE FUMARATE | 02387794 |
| QUETIAPINE FUMARATE | 02438003 |
| QUETIAPINE FUMARATE | 02236951 |
| QUETIAPINE FUMARATE | 02317893 |
| QUETIAPINE FUMARATE | 02316080 |
| QUETIAPINE FUMARATE | 02313995 |
| QUETIAPINE FUMARATE | 02313901 |

Appendix 1, as supplied by the authors. Appendix to: Welk B, Killin L, Reid JN, et al. Effect of electronic medication reconciliation at the time of hospital discharge on inappropriate medication use in the community: an interrupted time series analysis. *CMAJ Open* 2021. DOI:10.9778/cmajo.20210071. Copyright © 2021 The Author(s) or their employer(s). To receive this resource in an accessible format, please contact us at [cmajgroup@cmaj.ca](mailto:cmajgroup@cmaj.ca).



|                     |          |
|---------------------|----------|
| QUETIAPINE FUMARATE | 02311704 |
| QUETIAPINE FUMARATE | 02307804 |
| QUETIAPINE FUMARATE | 02299054 |
| QUETIAPINE FUMARATE | 02296551 |
| QUETIAPINE FUMARATE | 02284235 |
| QUETIAPINE FUMARATE | 02434024 |
| QUETIAPINE FUMARATE | 02439158 |
| QUETIAPINE FUMARATE | 02457253 |
| QUETIAPINE FUMARATE | 02413000 |
| QUETIAPINE FUMARATE | 02407728 |
| QUETIAPINE FUMARATE | 02395479 |
| QUETIAPINE FUMARATE | 02330466 |
| QUETIAPINE FUMARATE | 02399857 |
| QUETIAPINE FUMARATE | 02397129 |
| QUETIAPINE FUMARATE | 02390256 |
| QUETIAPINE FUMARATE | 02387832 |
| QUETIAPINE FUMARATE | 02438054 |
| QUETIAPINE FUMARATE | 02314029 |
| QUETIAPINE FUMARATE | 02317931 |
| QUETIAPINE FUMARATE | 02316129 |
| QUETIAPINE FUMARATE | 02313944 |
| QUETIAPINE FUMARATE | 02311755 |
| QUETIAPINE FUMARATE | 02307847 |
| QUETIAPINE FUMARATE | 02296608 |
| QUETIAPINE FUMARATE | 02284286 |
| QUETIAPINE FUMARATE | 02244107 |
| QUETIAPINE FUMARATE | 02300206 |
| QUETIAPINE FUMARATE | 02434059 |
| QUETIAPINE FUMARATE | 02439190 |
| QUETIAPINE FUMARATE | 02457261 |
| QUETIAPINE FUMARATE | 02407736 |
| QUETIAPINE FUMARATE | 02395487 |
| QUETIAPINE FUMARATE | 02300214 |
| QUETIAPINE FUMARATE | 02457229 |
| QUETIAPINE FUMARATE | 02407671 |
| QUETIAPINE FUMARATE | 02395444 |
| QUETIAPINE FUMARATE | 02300184 |
| QUETIAPINE FUMARATE | 02284251 |
| QUETIAPINE FUMARATE | 02296586 |
| QUETIAPINE FUMARATE | 02298996 |
| QUETIAPINE FUMARATE | 02299003 |
| QUETIAPINE FUMARATE | 02299011 |

Appendix 1, as supplied by the authors. Appendix to: Welk B, Killin L, Reid JN, et al. Effect of electronic medication reconciliation at the time of hospital discharge on inappropriate medication use in the community: an interrupted time series analysis. *CMAJ Open* 2021. DOI:10.9778/cmajo.20210071. Copyright © 2021 The Author(s) or their employer(s). To receive this resource in an accessible format, please contact us at [cmajgroup@cmaj.ca](mailto:cmajgroup@cmaj.ca).

|                     |          |
|---------------------|----------|
| QUETIAPINE FUMARATE | 02299038 |
| QUETIAPINE FUMARATE | 02299046 |
| QUETIAPINE FUMARATE | 02299070 |
| QUETIAPINE FUMARATE | 02299089 |
| QUETIAPINE FUMARATE | 02299097 |
| QUETIAPINE FUMARATE | 02307820 |
| QUETIAPINE FUMARATE | 02316102 |
| QUETIAPINE FUMARATE | 02316692 |
| QUETIAPINE FUMARATE | 02316706 |
| QUETIAPINE FUMARATE | 02316714 |
| QUETIAPINE FUMARATE | 02316722 |
| QUETIAPINE FUMARATE | 02316730 |
| QUETIAPINE FUMARATE | 02317346 |
| QUETIAPINE FUMARATE | 02317354 |
| QUETIAPINE FUMARATE | 02317362 |
| QUETIAPINE FUMARATE | 02317370 |
| QUETIAPINE FUMARATE | 02317915 |
| QUETIAPINE FUMARATE | 02323737 |
| QUETIAPINE FUMARATE | 02323745 |
| QUETIAPINE FUMARATE | 02323753 |
| QUETIAPINE FUMARATE | 02323761 |
| QUETIAPINE FUMARATE | 02323788 |
| QUETIAPINE FUMARATE | 02330431 |
| QUETIAPINE FUMARATE | 02333031 |
| QUETIAPINE FUMARATE | 02333058 |
| QUETIAPINE FUMARATE | 02333066 |
| QUETIAPINE FUMARATE | 02333074 |
| QUETIAPINE FUMARATE | 02339153 |
| QUETIAPINE FUMARATE | 02339161 |
| QUETIAPINE FUMARATE | 02339188 |
| QUETIAPINE FUMARATE | 02339196 |
| QUETIAPINE FUMARATE | 02340127 |
| QUETIAPINE FUMARATE | 02340135 |
| QUETIAPINE FUMARATE | 02340143 |
| QUETIAPINE FUMARATE | 02340151 |
| QUETIAPINE FUMARATE | 02342596 |
| QUETIAPINE FUMARATE | 02342618 |
| QUETIAPINE FUMARATE | 02342626 |
| QUETIAPINE FUMARATE | 02342634 |
| QUETIAPINE FUMARATE | 02342642 |
| QUETIAPINE FUMARATE | 02353172 |
| QUETIAPINE FUMARATE | 02353180 |

Appendix 1, as supplied by the authors. Appendix to: Welk B, Killin L, Reid JN, et al. Effect of electronic medication reconciliation at the time of hospital discharge on inappropriate medication use in the community: an interrupted time series analysis. *CMAJ Open* 2021. DOI:10.9778/cmajo.20210071. Copyright © 2021 The Author(s) or their employer(s). To receive this resource in an accessible format, please contact us at [cmajgroup@cmaj.ca](mailto:cmajgroup@cmaj.ca).

|                     |          |
|---------------------|----------|
| QUETIAPINE FUMARATE | 02361892 |
| QUETIAPINE FUMARATE | 02363925 |
| QUETIAPINE FUMARATE | 02363933 |
| QUETIAPINE FUMARATE | 02363941 |
| QUETIAPINE FUMARATE | 02387816 |
| QUETIAPINE FUMARATE | 02390221 |
| QUETIAPINE FUMARATE | 02395800 |
| QUETIAPINE FUMARATE | 02395819 |
| QUETIAPINE FUMARATE | 02395827 |
| QUETIAPINE FUMARATE | 02400340 |
| QUETIAPINE FUMARATE | 02400359 |
| QUETIAPINE FUMARATE | 02400367 |
| QUETIAPINE FUMARATE | 02400375 |
| QUETIAPINE FUMARATE | 02400383 |
| QUETIAPINE FUMARATE | 02412985 |
| QUETIAPINE FUMARATE | 02417359 |
| QUETIAPINE FUMARATE | 02417367 |
| QUETIAPINE FUMARATE | 02417375 |
| QUETIAPINE FUMARATE | 02417383 |
| QUETIAPINE FUMARATE | 02417391 |
| QUETIAPINE FUMARATE | 02417782 |
| QUETIAPINE FUMARATE | 02417790 |
| QUETIAPINE FUMARATE | 02417804 |
| QUETIAPINE FUMARATE | 02417812 |
| QUETIAPINE FUMARATE | 02417820 |
| QUETIAPINE FUMARATE | 02439174 |
| QUETIAPINE FUMARATE | 02447088 |
| QUETIAPINE FUMARATE | 02447096 |
| QUETIAPINE FUMARATE | 02447126 |
| QUETIAPINE FUMARATE | 02447134 |
| QUETIAPINE FUMARATE | 02447193 |
| QUETIAPINE FUMARATE | 02447207 |
| QUETIAPINE FUMARATE | 02447223 |
| QUETIAPINE FUMARATE | 02447258 |
| QUETIAPINE FUMARATE | 22123257 |
| QUETIAPINE FUMARATE | 82236951 |
| QUETIAPINE FUMARATE | 82236952 |
| RAN-OLANZAPINE      | 02403064 |
| RAN-OLANZAPINE      | 02403072 |
| RAN-OLANZAPINE      | 02403080 |
| RAN-OLANZAPINE      | 02403099 |
| RAN-OLANZAPINE      | 02403102 |

Appendix 1, as supplied by the authors. Appendix to: Welk B, Killin L, Reid JN, et al. Effect of electronic medication reconciliation at the time of hospital discharge on inappropriate medication use in the community: an interrupted time series analysis. *CMAJ Open* 2021. DOI:10.9778/cmajo.20210071. Copyright © 2021 The Author(s) or their employer(s). To receive this resource in an accessible format, please contact us at [cmajgroup@cmaj.ca](mailto:cmajgroup@cmaj.ca).

|                                              |          |
|----------------------------------------------|----------|
| RAN-OLANZAPINE IR                            | 02429594 |
| RAN-OLANZAPINE IR                            | 02429608 |
| RAN-OLANZAPINE IR                            | 02429616 |
| RAN-OLANZAPINE IR                            | 02429624 |
| RAN-OLANZAPINE IR                            | 02429632 |
| RAN-OLANZAPINE IR                            | 02429640 |
| RAN-OLANZAPINE ODT                           | 02414090 |
| RAN-OLANZAPINE ODT                           | 02414104 |
| RAN-OLANZAPINE ODT                           | 02414112 |
| RAN-OLANZAPINE ODT                           | 02414120 |
| RAN-RISPERIDONE                              | 02280906 |
| RAN-RISPERIDONE                              | 02280914 |
| RAN-RISPERIDONE                              | 02280922 |
| RAN-RISPERIDONE                              | 02280930 |
| RAN-RISPERIDONE                              | 02280949 |
| RAN-RISPERIDONE                              | 02280957 |
| RAN-RISPERIDONE                              | 02328305 |
| RAN-RISPERIDONE                              | 02328313 |
| RAN-RISPERIDONE                              | 02328321 |
| RAN-RISPERIDONE                              | 02328348 |
| RAN-RISPERIDONE                              | 02328364 |
| RAN-RISPERIDONE                              | 02328372 |
| RATIO-HALOPERIDOL 2MG/ML                     | 00552429 |
| RATIO-HALOPERIDOL TAB 0.5MG                  | 00552135 |
| RATIO-HALOPERIDOL TAB 10MG                   | 00728306 |
| RATIO-HALOPERIDOL TAB 1MG                    | 00552143 |
| RATIO-HALOPERIDOL TAB 2MG                    | 00728292 |
| RATIO-HALOPERIDOL TAB 5MG                    | 00647969 |
| RATIO-RISPERIDONE                            | 02264757 |
| RATIO-RISPERIDONE                            | 02264765 |
| RATIO-RISPERIDONE                            | 02264773 |
| RATIO-RISPERIDONE                            | 02264781 |
| RATIO-RISPERIDONE                            | 02264803 |
| RATIO-RISPERIDONE                            | 02264811 |
| REMOXIPRIDE HCL                              | 02036363 |
| REMOXIPRIDE HCL                              | 02036371 |
| REMOXIPRIDE HCL                              | 02036398 |
| RHO-FLUPHENAZINE DECANOATE INJ.CONC-100MG/ML | 02211165 |
| RHO-FLUPHENAZINE DECANOATE INJ-25MG/ML IM SC | 02211157 |
| RHO-HALOPERIDOL DECANOATE INJ.-IM 100MG/ML   | 02211149 |
| RHO-HALOPERIDOL DECANOATE INJ.-IM 50MG/ML    | 02211130 |
| RISPERIDONE                                  | 02332051 |

Appendix 1, as supplied by the authors. Appendix to: Welk B, Killin L, Reid JN, et al. Effect of electronic medication reconciliation at the time of hospital discharge on inappropriate medication use in the community: an interrupted time series analysis. *CMAJ Open* 2021. DOI:10.9778/cmajo.20210071. Copyright © 2021 The Author(s) or their employer(s). To receive this resource in an accessible format, please contact us at [cmajgroup@cmaj.ca](mailto:cmajgroup@cmaj.ca).

|             |          |
|-------------|----------|
| RISPERIDONE | 02332078 |
| RISPERIDONE | 02371766 |
| RISPERIDONE | 02359790 |
| RISPERIDONE | 02328305 |
| RISPERIDONE | 02359529 |
| RISPERIDONE | 02356880 |
| RISPERIDONE | 02264757 |
| RISPERIDONE | 02252007 |
| RISPERIDONE | 02240551 |
| RISPERIDONE | 02303655 |
| RISPERIDONE | 02303485 |
| RISPERIDONE | 02292807 |
| RISPERIDONE | 02282690 |
| RISPERIDONE | 02282585 |
| RISPERIDONE | 02282240 |
| RISPERIDONE | 02282119 |
| RISPERIDONE | 02280906 |
| RISPERIDONE | 02279509 |
| RISPERIDONE | 02264765 |
| RISPERIDONE | 02264188 |
| RISPERIDONE | 02252015 |
| RISPERIDONE | 02240552 |
| RISPERIDONE | 02303663 |
| RISPERIDONE | 02303493 |
| RISPERIDONE | 02282593 |
| RISPERIDONE | 02282259 |
| RISPERIDONE | 02282127 |
| RISPERIDONE | 02280914 |
| RISPERIDONE | 02279495 |
| RISPERIDONE | 02371774 |
| RISPERIDONE | 02359804 |
| RISPERIDONE | 02328313 |
| RISPERIDONE | 02359537 |
| RISPERIDONE | 02356899 |
| RISPERIDONE | 02247704 |
| RISPERIDONE | 02413485 |
| RISPERIDONE | 02332086 |
| RISPERIDONE | 02371782 |
| RISPERIDONE | 02359812 |
| RISPERIDONE | 02328321 |
| RISPERIDONE | 02359545 |
| RISPERIDONE | 02356902 |

Appendix 1, as supplied by the authors. Appendix to: Welk B, Killin L, Reid JN, et al. Effect of electronic medication reconciliation at the time of hospital discharge on inappropriate medication use in the community: an interrupted time series analysis. *CMAJ Open* 2021. DOI:10.9778/cmajo.20210071. Copyright © 2021 The Author(s) or their employer(s). To receive this resource in an accessible format, please contact us at [cmajgroup@cmaj.ca](mailto:cmajgroup@cmaj.ca).

|             |          |
|-------------|----------|
| RISPERIDONE | 02264773 |
| RISPERIDONE | 02264196 |
| RISPERIDONE | 02258455 |
| RISPERIDONE | 02252023 |
| RISPERIDONE | 02282607 |
| RISPERIDONE | 02282267 |
| RISPERIDONE | 02282135 |
| RISPERIDONE | 02280922 |
| RISPERIDONE | 02279800 |
| RISPERIDONE | 02025280 |
| RISPERIDONE | 02247705 |
| RISPERIDONE | 02291789 |
| RISPERIDONE | 02413493 |
| RISPERIDONE | 02236950 |
| RISPERIDONE | 02280396 |
| RISPERIDONE | 02279266 |
| RISPERIDONE | 02255707 |
| RISPERIDONE | 02264781 |
| RISPERIDONE | 02264218 |
| RISPERIDONE | 02258463 |
| RISPERIDONE | 02252031 |
| RISPERIDONE | 02303515 |
| RISPERIDONE | 02282615 |
| RISPERIDONE | 02282275 |
| RISPERIDONE | 02282143 |
| RISPERIDONE | 02280930 |
| RISPERIDONE | 02279819 |
| RISPERIDONE | 02332094 |
| RISPERIDONE | 02371790 |
| RISPERIDONE | 02359820 |
| RISPERIDONE | 02328348 |
| RISPERIDONE | 02359553 |
| RISPERIDONE | 02356910 |
| RISPERIDONE | 02025299 |
| RISPERIDONE | 02413507 |
| RISPERIDONE | 02247706 |
| RISPERIDONE | 02291797 |
| RISPERIDONE | 02255723 |
| RISPERIDONE | 02264803 |
| RISPERIDONE | 02264226 |
| RISPERIDONE | 02252058 |
| RISPERIDONE | 02282623 |

Appendix 1, as supplied by the authors. Appendix to: Welk B, Killin L, Reid JN, et al. Effect of electronic medication reconciliation at the time of hospital discharge on inappropriate medication use in the community: an interrupted time series analysis. *CMAJ Open* 2021. DOI:10.9778/cmajo.20210071. Copyright © 2021 The Author(s) or their employer(s). To receive this resource in an accessible format, please contact us at [cmajgroup@cmaj.ca](mailto:cmajgroup@cmaj.ca).

|             |          |
|-------------|----------|
| RISPERIDONE | 02282283 |
| RISPERIDONE | 02282151 |
| RISPERIDONE | 02280949 |
| RISPERIDONE | 02279827 |
| RISPERIDONE | 02332108 |
| RISPERIDONE | 02371804 |
| RISPERIDONE | 02328364 |
| RISPERIDONE | 02359839 |
| RISPERIDONE | 02359561 |
| RISPERIDONE | 02356929 |
| RISPERIDONE | 02025302 |
| RISPERIDONE | 02413515 |
| RISPERIDONE | 02370697 |
| RISPERIDONE | 02268086 |
| RISPERIDONE | 02264811 |
| RISPERIDONE | 02264234 |
| RISPERIDONE | 02258498 |
| RISPERIDONE | 02252066 |
| RISPERIDONE | 02282631 |
| RISPERIDONE | 02282291 |
| RISPERIDONE | 02282178 |
| RISPERIDONE | 02280957 |
| RISPERIDONE | 02279835 |
| RISPERIDONE | 02332116 |
| RISPERIDONE | 02371812 |
| RISPERIDONE | 02328372 |
| RISPERIDONE | 02359847 |
| RISPERIDONE | 02359588 |
| RISPERIDONE | 02356937 |
| RISPERIDONE | 02025310 |
| RISPERIDONE | 02413523 |
| RISPERIDONE | 02370700 |
| RISPERIDONE | 02268094 |
| RISPERIDONE | 02255758 |
| RISPERIDONE | 02230455 |
| RISPERIDONE | 02255715 |
| RISPERIDONE | 02255731 |
| RISPERIDONE | 02255766 |
| RISPERIDONE | 02258439 |
| RISPERIDONE | 02258447 |
| RISPERIDONE | 02258471 |
| RISPERIDONE | 02278421 |

Appendix 1, as supplied by the authors. Appendix to: Welk B, Killin L, Reid JN, et al. Effect of electronic medication reconciliation at the time of hospital discharge on inappropriate medication use in the community: an interrupted time series analysis. *CMAJ Open* 2021. DOI:10.9778/cmajo.20210071. Copyright © 2021 The Author(s) or their employer(s). To receive this resource in an accessible format, please contact us at [cmajgroup@cmaj.ca](mailto:cmajgroup@cmaj.ca).

|             |          |
|-------------|----------|
| RISPERIDONE | 02278448 |
| RISPERIDONE | 02278456 |
| RISPERIDONE | 02278464 |
| RISPERIDONE | 02278472 |
| RISPERIDONE | 02278480 |
| RISPERIDONE | 02283565 |
| RISPERIDONE | 02283573 |
| RISPERIDONE | 02283581 |
| RISPERIDONE | 02283603 |
| RISPERIDONE | 02283611 |
| RISPERIDONE | 02283638 |
| RISPERIDONE | 02284871 |
| RISPERIDONE | 02284898 |
| RISPERIDONE | 02284901 |
| RISPERIDONE | 02284928 |
| RISPERIDONE | 02284936 |
| RISPERIDONE | 02284944 |
| RISPERIDONE | 02289628 |
| RISPERIDONE | 02289636 |
| RISPERIDONE | 02289644 |
| RISPERIDONE | 02289652 |
| RISPERIDONE | 02289660 |
| RISPERIDONE | 02291770 |
| RISPERIDONE | 02294435 |
| RISPERIDONE | 02294443 |
| RISPERIDONE | 02294451 |
| RISPERIDONE | 02294478 |
| RISPERIDONE | 02294486 |
| RISPERIDONE | 02294494 |
| RISPERIDONE | 02296756 |
| RISPERIDONE | 02296764 |
| RISPERIDONE | 02296772 |
| RISPERIDONE | 02296780 |
| RISPERIDONE | 02296799 |
| RISPERIDONE | 02296802 |
| RISPERIDONE | 02298465 |
| RISPERIDONE | 02303507 |
| RISPERIDONE | 02303523 |
| RISPERIDONE | 02303531 |
| RISPERIDONE | 02309572 |
| RISPERIDONE | 02312700 |
| RISPERIDONE | 02312719 |

Appendix 1, as supplied by the authors. Appendix to: Welk B, Killin L, Reid JN, et al. Effect of electronic medication reconciliation at the time of hospital discharge on inappropriate medication use in the community: an interrupted time series analysis. *CMAJ Open* 2021. DOI:10.9778/cmajo.20210071. Copyright © 2021 The Author(s) or their employer(s). To receive this resource in an accessible format, please contact us at [cmajgroup@cmaj.ca](mailto:cmajgroup@cmaj.ca).



|             |          |
|-------------|----------|
| RISPERIDONE | 02312727 |
| RISPERIDONE | 02312735 |
| RISPERIDONE | 02312743 |
| RISPERIDONE | 02312751 |
| RISPERIDONE | 02323516 |
| RISPERIDONE | 02323524 |
| RISPERIDONE | 02323532 |
| RISPERIDONE | 02323540 |
| RISPERIDONE | 02323559 |
| RISPERIDONE | 02323567 |
| RISPERIDONE | 02334372 |
| RISPERIDONE | 02334380 |
| RISPERIDONE | 02334399 |
| RISPERIDONE | 02334402 |
| RISPERIDONE | 02334410 |
| RISPERIDONE | 02334429 |
| RISPERIDONE | 02335387 |
| RISPERIDONE | 02335395 |
| RISPERIDONE | 02335409 |
| RISPERIDONE | 02335417 |
| RISPERIDONE | 02335425 |
| RISPERIDONE | 02335433 |
| RISPERIDONE | 02343711 |
| RISPERIDONE | 02343738 |
| RISPERIDONE | 02343746 |
| RISPERIDONE | 02343754 |
| RISPERIDONE | 02343762 |
| RISPERIDONE | 02343770 |
| RISPERIDONE | 02359057 |
| RISPERIDONE | 02359065 |
| RISPERIDONE | 02359073 |
| RISPERIDONE | 02359081 |
| RISPERIDONE | 02359103 |
| RISPERIDONE | 02359111 |
| RISPERIDONE | 02364344 |
| RISPERIDONE | 02365413 |
| RISPERIDONE | 02365421 |
| RISPERIDONE | 02365448 |
| RISPERIDONE | 02365456 |
| RISPERIDONE | 02365464 |
| RISPERIDONE | 02365472 |
| RISPERIDONE | 02367173 |

Appendix 1, as supplied by the authors. Appendix to: Welk B, Killin L, Reid JN, et al. Effect of electronic medication reconciliation at the time of hospital discharge on inappropriate medication use in the community: an interrupted time series analysis. *CMAJ Open* 2021. DOI:10.9778/cmajo.20210071. Copyright © 2021 The Author(s) or their employer(s). To receive this resource in an accessible format, please contact us at [cmajgroup@cmaj.ca](mailto:cmajgroup@cmaj.ca).

|                    |          |
|--------------------|----------|
| RISPERIDONE        | 02367181 |
| RISPERIDONE        | 02367203 |
| RISPERIDONE        | 02367211 |
| RISPERIDONE        | 02367238 |
| RISPERIDONE        | 02367246 |
| RISPERIDONE        | 02369079 |
| RISPERIDONE        | 02369087 |
| RISPERIDONE        | 02369095 |
| RISPERIDONE        | 02369117 |
| RISPERIDONE        | 02369125 |
| RISPERIDONE        | 02369133 |
| RISPERIDONE        | 02372622 |
| RISPERIDONE        | 02372630 |
| RISPERIDONE        | 02372649 |
| RISPERIDONE        | 02372657 |
| RISPERIDONE        | 02372665 |
| RISPERIDONE        | 02372673 |
| RISPERIDONE        | 22123109 |
| RISPERIDONE        | 77292701 |
| RISPERIDONE        | 82025280 |
| RISPERIDONE        | 82025299 |
| RISPERIDONE        | 02303485 |
| RISPERIDONE        | 02303493 |
| RISPERIDONE        | 02303507 |
| RISPERIDONE        | 02303515 |
| RISPERIDONE        | 02303523 |
| RISPERIDONE        | 02303531 |
| RISPERIDONE        | 02343711 |
| RISPERIDONE        | 02343738 |
| RISPERIDONE        | 02343746 |
| RISPERIDONE        | 02343754 |
| RISPERIDONE        | 02343762 |
| RISPERIDONE        | 02343770 |
| RISPERIDONE        | 02356880 |
| RISPERIDONE        | 02356899 |
| RISPERIDONE        | 02356902 |
| RISPERIDONE        | 02356910 |
| RISPERIDONE        | 02356929 |
| RISPERIDONE        | 02356937 |
| RISPERIDONE - 0.25 | 02296756 |
| RISPERIDONE - 0.5  | 02296764 |
| RISPERIDONE - 1    | 02296772 |

Appendix 1, as supplied by the authors. Appendix to: Welk B, Killin L, Reid JN, et al. Effect of electronic medication reconciliation at the time of hospital discharge on inappropriate medication use in the community: an interrupted time series analysis. *CMAJ Open* 2021. DOI:10.9778/cmajo.20210071. Copyright © 2021 The Author(s) or their employer(s). To receive this resource in an accessible format, please contact us at [cmajgroup@cmaj.ca](mailto:cmajgroup@cmaj.ca).

|                                    |          |
|------------------------------------|----------|
| RISPERIDONE - 2                    | 02296780 |
| RISPERIDONE - 3                    | 02296799 |
| RISPERIDONE - 4                    | 02296802 |
| RISPERIDONE (RISPERIDONE TARTRATE) | 02236950 |
| RISPERIDONE TABLETS                | 02332051 |
| RISPERIDONE TABLETS                | 02332078 |
| RISPERIDONE TABLETS                | 02332086 |
| RISPERIDONE TABLETS                | 02332094 |
| RISPERIDONE TABLETS                | 02332108 |
| RISPERIDONE TABLETS                | 02332116 |
| RISPERIDONE TARTRATE               | 02454319 |
| RIVA-ARIPRAZOLE                    | 02479346 |
| RIVA-ARIPRAZOLE                    | 02479354 |
| RIVA-ARIPRAZOLE                    | 02479362 |
| RIVA-ARIPRAZOLE                    | 02479370 |
| RIVA-ARIPRAZOLE                    | 02479389 |
| RIVA-ARIPRAZOLE                    | 02479397 |
| RIVA-OLANZAPINE                    | 02337126 |
| RIVA-OLANZAPINE                    | 02337134 |
| RIVA-OLANZAPINE                    | 02337142 |
| RIVA-OLANZAPINE                    | 02337150 |
| RIVA-OLANZAPINE                    | 02337169 |
| RIVA-OLANZAPINE ODT                | 02339811 |
| RIVA-OLANZAPINE ODT                | 02339838 |
| RIVA-OLANZAPINE ODT                | 02339846 |
| RIVA-OLANZAPINE ODT                | 02392399 |
| RIVA-RISPERIDONE                   | 02283565 |
| RIVA-RISPERIDONE                   | 02283573 |
| RIVA-RISPERIDONE                   | 02283581 |
| RIVA-RISPERIDONE                   | 02283603 |
| RIVA-RISPERIDONE                   | 02283611 |
| RIVA-RISPERIDONE                   | 02283638 |
| SANDOZ ARIPIRAZOLE                 | 02473658 |
| SANDOZ ARIPIRAZOLE                 | 02473666 |
| SANDOZ ARIPIRAZOLE                 | 02473674 |
| SANDOZ ARIPIRAZOLE                 | 02473682 |
| SANDOZ ARIPIRAZOLE                 | 02473690 |
| SANDOZ ARIPIRAZOLE                 | 02473704 |
| SANDOZ CLOZAPINE                   | 02247798 |
| SANDOZ CLOZAPINE                   | 02247805 |
| SANDOZ OLANZAPINE                  | 02310341 |
| SANDOZ OLANZAPINE                  | 02310368 |

Appendix 1, as supplied by the authors. Appendix to: Welk B, Killin L, Reid JN, et al. Effect of electronic medication reconciliation at the time of hospital discharge on inappropriate medication use in the community: an interrupted time series analysis. *CMAJ Open* 2021. DOI:10.9778/cmajo.20210071. Copyright © 2021 The Author(s) or their employer(s). To receive this resource in an accessible format, please contact us at [cmajgroup@cmaj.ca](mailto:cmajgroup@cmaj.ca).

|                         |          |
|-------------------------|----------|
| SANDOZ OLANZAPINE       | 02310376 |
| SANDOZ OLANZAPINE       | 02310384 |
| SANDOZ OLANZAPINE       | 02310392 |
| SANDOZ OLANZAPINE       | 02310406 |
| SANDOZ OLANZAPINE ODT   | 02327775 |
| SANDOZ OLANZAPINE ODT   | 02327783 |
| SANDOZ OLANZAPINE ODT   | 02327791 |
| SANDOZ OLANZAPINE ODT   | 02327805 |
| SANDOZ PROCHLORPERAZINE | 00789720 |
| SANDOZ RISPERIDONE      | 02279495 |
| SANDOZ RISPERIDONE      | 02279509 |
| SANDOZ RISPERIDONE      | 02279800 |
| SANDOZ RISPERIDONE      | 02279819 |
| SANDOZ RISPERIDONE      | 02279827 |
| SANDOZ RISPERIDONE      | 02279835 |
| SANDOZ RISPERIDONE      | 02292807 |
| SANDOZ RISPERIDONE      | 02303655 |
| SANDOZ RISPERIDONE      | 02303663 |
| SULPIRIDE               | 66124173 |
| TEVA-ARIPIRAZOLE        | 02464144 |
| TEVA-ARIPIRAZOLE        | 02464152 |
| TEVA-ARIPIRAZOLE        | 02464160 |
| TEVA-ARIPIRAZOLE        | 02464179 |
| TEVA-ARIPIRAZOLE        | 02464187 |
| TEVA-ARIPIRAZOLE        | 02464195 |
| TEVA-CHLORPROMAZINE     | 00232807 |
| TEVA-CHLORPROMAZINE     | 00232823 |
| TEVA-CHLORPROMAZINE     | 00232831 |
| TEVA-HALOPERIDOL        | 00363650 |
| TEVA-HALOPERIDOL        | 00363669 |
| TEVA-HALOPERIDOL        | 00363677 |
| TEVA-HALOPERIDOL        | 00363685 |
| TEVA-HALOPERIDOL        | 00713449 |
| TEVA-HALOPERIDOL        | 00768820 |
| TEVA-OLANZAPINE         | 02276712 |
| TEVA-OLANZAPINE         | 02276720 |
| TEVA-OLANZAPINE         | 02276739 |
| TEVA-OLANZAPINE         | 02276747 |
| TEVA-OLANZAPINE         | 02276755 |
| TEVA-OLANZAPINE         | 02359707 |
| TEVA-OLANZAPINE OD      | 02321378 |
| TEVA-OLANZAPINE OD      | 02321386 |

Appendix 1, as supplied by the authors. Appendix to: Welk B, Killin L, Reid JN, et al. Effect of electronic medication reconciliation at the time of hospital discharge on inappropriate medication use in the community: an interrupted time series analysis. *CMAJ Open* 2021. DOI:10.9778/cmajo.20210071. Copyright © 2021 The Author(s) or their employer(s). To receive this resource in an accessible format, please contact us at [cmajgroup@cmaj.ca](mailto:cmajgroup@cmaj.ca).

|                         |          |
|-------------------------|----------|
| TEVA-OLANZAPINE ODT     | 02321343 |
| TEVA-OLANZAPINE ODT     | 02321351 |
| TEVA-RISPERIDONE        | 02264188 |
| TEVA-RISPERIDONE        | 02264196 |
| TEVA-RISPERIDONE        | 02264218 |
| TEVA-RISPERIDONE        | 02264226 |
| TEVA-RISPERIDONE        | 02264234 |
| TEVA-RISPERIDONE        | 02282690 |
| THIOPROPAZATE HCL       | 00028614 |
| THIOPROPRAZINE MESYLATE | 00025763 |
| THIOPROPRAZINE MESYLATE | 01927639 |
| THIOPROPRAZINE MESYLATE | 00025747 |
| THIOPROPRAZINE MESYLATE | 00025755 |
| THIORIDAZINE HCL        | 00456101 |
| THIORIDAZINE HCL        | 00037478 |
| THIORIDAZINE HCL        | 00360244 |
| THIORIDAZINE HCL        | 00027553 |
| THIORIDAZINE HCL        | 00575143 |
| THIORIDAZINE HCL        | 00027375 |
| THIORIDAZINE HCL        | 00456063 |
| THIORIDAZINE HCL        | 00037508 |
| THIORIDAZINE HCL        | 00360228 |
| THIORIDAZINE HCL        | 00027529 |
| THIORIDAZINE HCL        | 00575119 |
| THIORIDAZINE HCL        | 00456071 |
| THIORIDAZINE HCL        | 00037494 |
| THIORIDAZINE HCL        | 00360198 |
| THIORIDAZINE HCL        | 00027537 |
| THIORIDAZINE HCL        | 00575127 |
| THIORIDAZINE HCL        | 00238775 |
| THIORIDAZINE HCL        | 02229553 |
| THIORIDAZINE HCL        | 00027359 |
| THIORIDAZINE HCL        | 00775320 |
| THIORIDAZINE HCL        | 00456098 |
| THIORIDAZINE HCL        | 00037486 |
| THIORIDAZINE HCL        | 00360236 |
| THIORIDAZINE HCL        | 00027545 |
| THIORIDAZINE HCL        | 00575135 |
| THIORIDAZINE HCL        | 00027561 |
| THIORIDAZINE HCL        | 00238783 |
| THIORIDAZINE HCL        | 00238791 |
| THIORIDAZINE HCL        | 00238805 |

Appendix 1, as supplied by the authors. Appendix to: Welk B, Killin L, Reid JN, et al. Effect of electronic medication reconciliation at the time of hospital discharge on inappropriate medication use in the community: an interrupted time series analysis. *CMAJ Open* 2021. DOI:10.9778/cmajo.20210071. Copyright © 2021 The Author(s) or their employer(s). To receive this resource in an accessible format, please contact us at [cmajgroup@cmaj.ca](mailto:cmajgroup@cmaj.ca).

|                  |          |
|------------------|----------|
| THIORIDAZINE HCL | 00238813 |
| THIORIDAZINE HCL | 00238821 |
| THIORIDAZINE HCL | 00262587 |
| THIORIDAZINE HCL | 00268844 |
| THIORIDAZINE HCL | 00268852 |
| THIORIDAZINE HCL | 00271209 |
| THIORIDAZINE HCL | 00271217 |
| THIORIDAZINE HCL | 00271225 |
| THIORIDAZINE HCL | 00272728 |
| THIORIDAZINE HCL | 00324345 |
| THIORIDAZINE HCL | 00324353 |
| THIORIDAZINE HCL | 00386537 |
| THIORIDAZINE HCL | 00386545 |
| THIORIDAZINE HCL | 00386553 |
| THIORIDAZINE HCL | 00393541 |
| THIORIDAZINE HCL | 00431125 |
| THIORIDAZINE HCL | 00431133 |
| THIORIDAZINE HCL | 00431141 |
| THIORIDAZINE HCL | 00445223 |
| THIORIDAZINE HCL | 00456381 |
| THIORIDAZINE HCL | 00502359 |
| THIORIDAZINE HCL | 00502367 |
| THIORIDAZINE HCL | 00502375 |
| THIORIDAZINE HCL | 00502383 |
| THIORIDAZINE HCL | 00776513 |
| THIORIDAZINE HCL | 00885592 |
| THIORIDAZINE HCL | 00885606 |
| THIORIDAZINE HCL | 00885614 |
| THIORIDAZINE HCL | 00903700 |
| THIORIDAZINE HCL | 00903726 |
| THIORIDAZINE HCL | 66124536 |
| THIORIDAZINE HCL | 66124538 |
| THIORIDAZINE HCL | 66124547 |
| THIORIDAZINE HCL | 00027359 |
| THIORIDAZINE HCL | 00027553 |
| THIORIDAZINE HCL | 00027529 |
| THIORIDAZINE HCL | 00027561 |
| THIORIDAZINE HCL | 00027537 |
| THIORIDAZINE HCL | 00027545 |
| THIORIDAZINE HCL | 00037478 |
| THIORIDAZINE HCL | 00037508 |
| THIORIDAZINE HCL | 00037494 |

Appendix 1, as supplied by the authors. Appendix to: Welk B, Killin L, Reid JN, et al. Effect of electronic medication reconciliation at the time of hospital discharge on inappropriate medication use in the community: an interrupted time series analysis. *CMAJ Open* 2021. DOI:10.9778/cmajo.20210071. Copyright © 2021 The Author(s) or their employer(s). To receive this resource in an accessible format, please contact us at [cmajgroup@cmaj.ca](mailto:cmajgroup@cmaj.ca).

|                              |          |
|------------------------------|----------|
| THIORIDAZINE HCL             | 00037486 |
| THIORIDAZINE HCL             | 00262587 |
| THIORIDAZINE HCL             | 00575135 |
| THIORIDAZINE HCL             | 00575143 |
| THIORIDAZINE HCL             | 00575119 |
| THIORIDAZINE HCL             | 00775320 |
| THIORIDAZINE HCL             | 00776513 |
| THIORIDAZINE HCL             | 00575127 |
| THIORIDAZINE HCL             | 00431125 |
| THIORIDAZINE HCL             | 00431133 |
| THIORIDAZINE HCL             | 00431141 |
| THIOTHIXENE                  | 00024457 |
| THIOTHIXENE                  | 00024430 |
| THIOTHIXENE                  | 00024449 |
| THIOTHIXENE                  | 00024449 |
| THIOTHIXENE                  | 00024430 |
| THIOTHIXENE                  | 00024457 |
| TORRENT-OLANZAPINE ODT       | 02404702 |
| TORRENT-OLANZAPINE ODT       | 02404729 |
| TORRENT-OLANZAPINE ODT       | 02404737 |
| TORRENT-OLANZAPINE ODT       | 02404745 |
| TRIFLUOPERAZINE              | 00017175 |
| TRIFLUOPERAZINE              | 00131733 |
| TRIFLUOPERAZINE              | 00726214 |
| TRIFLUOPERAZINE              | 00726222 |
| TRIFLUOPERAZINE              | 00726230 |
| TRIFLUOPERAZINE              | 00726249 |
| TRIFLUOPERAZINE              | 00726257 |
| TRIFLUOPERAZINE              | 00312746 |
| TRIFLUOPERAZINE              | 00312754 |
| TRIFLUOPERAZINE              | 00326836 |
| TRIFLUOPERAZINE              | 00345539 |
| TRIFLUOPERAZINE              | 00595942 |
| TRIFLUOPERAZINE 10MG TABLETS | 02232692 |
| TRIFLUOPERAZINE 1MG TABLETS  | 02232680 |
| TRIFLUOPERAZINE 2MG TABLETS  | 02232690 |
| TRIFLUOPERAZINE 5MG TABLETS  | 02232691 |
| TRIFLUOPERAZINE HCL          | 00298212 |
| TRIFLUOPERAZINE HCL          | 00027022 |
| TRIFLUOPERAZINE HCL          | 01918249 |
| TRIFLUOPERAZINE HCL          | 01918230 |
| TRIFLUOPERAZINE HCL          | 00021881 |

Appendix 1, as supplied by the authors. Appendix to: Welk B, Killin L, Reid JN, et al. Effect of electronic medication reconciliation at the time of hospital discharge on inappropriate medication use in the community: an interrupted time series analysis. *CMAJ Open* 2021. DOI:10.9778/cmajo.20210071. Copyright © 2021 The Author(s) or their employer(s). To receive this resource in an accessible format, please contact us at [cmajgroup@cmaj.ca](mailto:cmajgroup@cmaj.ca).

|                     |          |
|---------------------|----------|
| TRIFLUOPERAZINE HCL | 00326836 |
| TRIFLUOPERAZINE HCL | 00280399 |
| TRIFLUOPERAZINE HCL | 00027170 |
| TRIFLUOPERAZINE HCL | 00249092 |
| TRIFLUOPERAZINE HCL | 00021857 |
| TRIFLUOPERAZINE HCL | 00345539 |
| TRIFLUOPERAZINE HCL | 00027146 |
| TRIFLUOPERAZINE HCL | 00249068 |
| TRIFLUOPERAZINE HCL | 01918206 |
| TRIFLUOPERAZINE HCL | 01918257 |
| TRIFLUOPERAZINE HCL | 00026999 |
| TRIFLUOPERAZINE HCL | 00021865 |
| TRIFLUOPERAZINE HCL | 00312754 |
| TRIFLUOPERAZINE HCL | 00013900 |
| TRIFLUOPERAZINE HCL | 00027154 |
| TRIFLUOPERAZINE HCL | 00249076 |
| TRIFLUOPERAZINE HCL | 01918214 |
| TRIFLUOPERAZINE HCL | 01918222 |
| TRIFLUOPERAZINE HCL | 00021873 |
| TRIFLUOPERAZINE HCL | 00312746 |
| TRIFLUOPERAZINE HCL | 00013919 |
| TRIFLUOPERAZINE HCL | 00027162 |
| TRIFLUOPERAZINE HCL | 00271527 |
| TRIFLUOPERAZINE HCL | 00249084 |
| TRIFLUOPERAZINE HCL | 00013897 |
| TRIFLUOPERAZINE HCL | 00013927 |
| TRIFLUOPERAZINE HCL | 00017183 |
| TRIFLUOPERAZINE HCL | 00017191 |
| TRIFLUOPERAZINE HCL | 00017205 |
| TRIFLUOPERAZINE HCL | 00018473 |
| TRIFLUOPERAZINE HCL | 00018481 |
| TRIFLUOPERAZINE HCL | 00018503 |
| TRIFLUOPERAZINE HCL | 00018511 |
| TRIFLUOPERAZINE HCL | 00024279 |
| TRIFLUOPERAZINE HCL | 00024287 |
| TRIFLUOPERAZINE HCL | 00024295 |
| TRIFLUOPERAZINE HCL | 00027006 |
| TRIFLUOPERAZINE HCL | 00027030 |
| TRIFLUOPERAZINE HCL | 00116734 |
| TRIFLUOPERAZINE HCL | 00210749 |
| TRIFLUOPERAZINE HCL | 00210757 |
| TRIFLUOPERAZINE HCL | 00210838 |

Appendix 1, as supplied by the authors. Appendix to: Welk B, Killin L, Reid JN, et al. Effect of electronic medication reconciliation at the time of hospital discharge on inappropriate medication use in the community: an interrupted time series analysis. *CMAJ Open* 2021. DOI:10.9778/cmajo.20210071. Copyright © 2021 The Author(s) or their employer(s). To receive this resource in an accessible format, please contact us at [cmajgroup@cmaj.ca](mailto:cmajgroup@cmaj.ca).



|                          |          |
|--------------------------|----------|
| TRIFLUOPERAZINE HCL      | 00210862 |
| TRIFLUOPERAZINE HCL      | 00255149 |
| TRIFLUOPERAZINE HCL      | 00294861 |
| TRIFLUOPERAZINE HCL      | 00303453 |
| TRIFLUOPERAZINE HCL      | 00345881 |
| TRIFLUOPERAZINE HCL      | 00345903 |
| TRIFLUOPERAZINE HCL      | 00345911 |
| TRIFLUOPERAZINE HCL      | 00346381 |
| TRIFLUOPERAZINE HCL      | 00386502 |
| TRIFLUOPERAZINE HCL      | 00386510 |
| TRIFLUOPERAZINE HCL      | 00386529 |
| TRIFLUOPERAZINE HCL      | 00389943 |
| TRIFLUOPERAZINE HCL      | 00431176 |
| TRIFLUOPERAZINE HCL      | 00431184 |
| TRIFLUOPERAZINE HCL      | 00431192 |
| TRIFLUOPERAZINE HCL      | 00431206 |
| TRIFLUOPERAZINE HCL      | 00451630 |
| TRIFLUOPERAZINE HCL      | 00460028 |
| TRIFLUOPERAZINE HCL      | 00460044 |
| TRIFLUOPERAZINE HCL      | 00460052 |
| TRIFLUOPERAZINE HCL      | 00460060 |
| TRIFLUOPERAZINE HCL      | 00503452 |
| TRIFLUOPERAZINE HCL      | 00503460 |
| TRIFLUOPERAZINE HCL      | 00503479 |
| TRIFLUOPERAZINE HCL      | 00503487 |
| TRIFLUOPERAZINE HCL      | 00595942 |
| TRIFLUOPERAZINE HCL      | 00751871 |
| TRIFLUOPERAZINE HCL      | 00886718 |
| TRIFLUOPERAZINE HCL      | 02232680 |
| TRIFLUOPERAZINE HCL      | 02232690 |
| TRIFLUOPERAZINE HCL      | 02232691 |
| TRIFLUOPERAZINE HCL      | 02232692 |
| TRIFLUOPERAZINE TAB 10MG | 00389943 |
| TRIFLUOPERAZINE TAB 10MG | 00431206 |
| TRIFLUOPERAZINE TAB 1MG  | 00386529 |
| TRIFLUOPERAZINE TAB 1MG  | 00431176 |
| TRIFLUOPERAZINE TAB 2MG  | 00386510 |
| TRIFLUOPERAZINE TAB 2MG  | 00431184 |
| TRIFLUOPERAZINE TAB 5MG  | 00386502 |
| TRIFLUOPERAZINE TAB 5MG  | 00431192 |
| VAN-OLANZAPINE           | 02428008 |
| VAN-OLANZAPINE           | 02428016 |

Appendix 1, as supplied by the authors. Appendix to: Welk B, Killin L, Reid JN, et al. Effect of electronic medication reconciliation at the time of hospital discharge on inappropriate medication use in the community: an interrupted time series analysis. *CMAJ Open* 2021. DOI:10.9778/cmajo.20210071. Copyright © 2021 The Author(s) or their employer(s). To receive this resource in an accessible format, please contact us at [cmajgroup@cmaj.ca](mailto:cmajgroup@cmaj.ca).

|                                           |          |
|-------------------------------------------|----------|
| VAN-OLANZAPINE                            | 02428024 |
| VAN-OLANZAPINE                            | 02428032 |
| VAN-OLANZAPINE                            | 02428040 |
| VAN-OLANZAPINE ODT                        | 02438828 |
| VAN-OLANZAPINE ODT                        | 02438836 |
| VAN-OLANZAPINE ODT                        | 02438844 |
| VAN-OLANZAPINE ODT                        | 02438852 |
| ZIPRASIDONE (ZIPRASIDONE HCL MONOHYDRATE) | 02449544 |
| ZIPRASIDONE (ZIPRASIDONE HCL MONOHYDRATE) | 02449552 |
| ZIPRASIDONE (ZIPRASIDONE HCL MONOHYDRATE) | 02449560 |
| ZIPRASIDONE (ZIPRASIDONE HCL MONOHYDRATE) | 02449579 |
| ZIPRASIDONE (ZIPRASIDONE HCL MONOHYDRATE) | 02441357 |
| ZIPRASIDONE (ZIPRASIDONE HCL MONOHYDRATE) | 02441365 |
| ZIPRASIDONE (ZIPRASIDONE HCL MONOHYDRATE) | 02441373 |
| ZIPRASIDONE (ZIPRASIDONE HCL MONOHYDRATE) | 02441381 |
| ZIPRASIDONE (ZIPRASIDONE HCL MONOHYDRATE) | 02429365 |
| ZIPRASIDONE (ZIPRASIDONE HCL MONOHYDRATE) | 02429373 |
| ZIPRASIDONE (ZIPRASIDONE HCL MONOHYDRATE) | 02429381 |
| ZIPRASIDONE (ZIPRASIDONE HCL MONOHYDRATE) | 02429403 |
| ZIPRASIDONE (ZIPRASIDONE HCL MONOHYDRATE) | 02298597 |
| ZIPRASIDONE (ZIPRASIDONE HCL MONOHYDRATE) | 02298600 |
| ZIPRASIDONE (ZIPRASIDONE HCL MONOHYDRATE) | 02298619 |
| ZIPRASIDONE (ZIPRASIDONE HCL MONOHYDRATE) | 02298627 |
| ZIPRASIDONE (ZIPRASIDONE HCL MONOHYDRATE) | 02478803 |
| ZIPRASIDONE (ZIPRASIDONE HCL MONOHYDRATE) | 02478811 |
| ZIPRASIDONE (ZIPRASIDONE HCL MONOHYDRATE) | 02478838 |
| ZIPRASIDONE (ZIPRASIDONE HCL MONOHYDRATE) | 02478846 |
| ZIPRASIDONE HCL                           | 02449544 |
| ZIPRASIDONE HCL                           | 02298597 |
| ZIPRASIDONE HCL                           | 02298600 |
| ZIPRASIDONE HCL                           | 02449552 |
| ZIPRASIDONE HCL                           | 02449560 |
| ZIPRASIDONE HCL                           | 02298619 |
| ZIPRASIDONE HCL                           | 02298627 |
| ZIPRASIDONE HCL                           | 02449579 |
| ZUCLOPENTHIXOL (ZUCLOPENTHIXOL HCL)       | 02162903 |
| ZUCLOPENTHIXOL (ZUCLOPENTHIXOL HCL)       | 02162911 |
| ZUCLOPENTHIXOL (ZUCLOPENTHIXOL HCL)       | 02162938 |
| ZUCLOPENTHIXOL (ZUCLOPENTHIXOL HCL)       | 02230402 |
| ZUCLOPENTHIXOL (ZUCLOPENTHIXOL HCL)       | 02230403 |
| ZUCLOPENTHIXOL (ZUCLOPENTHIXOL HCL)       | 02230404 |
| ZUCLOPENTHIXOL ACETATE                    | 02230405 |

Appendix 1, as supplied by the authors. Appendix to: Welk B, Killin L, Reid JN, et al. Effect of electronic medication reconciliation at the time of hospital discharge on inappropriate medication use in the community: an interrupted time series analysis. *CMAJ Open* 2021. DOI:10.9778/cmajo.20210071. Copyright © 2021 The Author(s) or their employer(s). To receive this resource in an accessible format, please contact us at [cmajgroup@cmaj.ca](mailto:cmajgroup@cmaj.ca).

|                          |          |
|--------------------------|----------|
| ZUCLOPENTHIXOL ACETATE   | 02162946 |
| ZUCLOPENTHIXOL ACETATE   | 02162946 |
| ZUCLOPENTHIXOL ACETATE   | 02230405 |
| ZUCLOPENTHIXOL DECANOATE | 02230406 |
| ZUCLOPENTHIXOL DECANOATE | 02162954 |
| ZUCLOPENTHIXOL DECANOATE | 02162962 |
| ZUCLOPENTHIXOL DECANOATE | 02230407 |
| ZUCLOPENTHIXOL DECANOATE | 02162954 |
| ZUCLOPENTHIXOL DECANOATE | 02162962 |
| ZUCLOPENTHIXOL DECANOATE | 02230406 |
| ZUCLOPENTHIXOL DECANOATE | 02230407 |
| ZUCLOPENTHIXOL HCL       | 02162903 |
| ZUCLOPENTHIXOL HCL       | 02230402 |
| ZUCLOPENTHIXOL HCL       | 02230403 |
| ZUCLOPENTHIXOL HCL       | 02162911 |
| ZUCLOPENTHIXOL HCL       | 02162938 |
| ZUCLOPENTHIXOL HCL       | 02230404 |
| ZUCLOPENTHIXOL HCL       | 00002590 |

Appendix 1, as supplied by the authors. Appendix to: Welk B, Killin L, Reid JN, et al. Effect of electronic medication reconciliation at the time of hospital discharge on inappropriate medication use in the community: an interrupted time series analysis. *CMAJ Open* 2021. DOI:10.9778/cmajo.20210071. Copyright © 2021 The Author(s) or their employer(s). To receive this resource in an accessible format, please contact us at [cmajgroup@cmaj.ca](mailto:cmajgroup@cmaj.ca).

## Section 5. Administrative data definitions used to define fall or fracture.

|                | Data sources              | Codes                                                                                                                                                                                                                                                                                                                                                                                                                                                                                                                                                                                                                                                                                                                                                                                                                                                                                            |
|----------------|---------------------------|--------------------------------------------------------------------------------------------------------------------------------------------------------------------------------------------------------------------------------------------------------------------------------------------------------------------------------------------------------------------------------------------------------------------------------------------------------------------------------------------------------------------------------------------------------------------------------------------------------------------------------------------------------------------------------------------------------------------------------------------------------------------------------------------------------------------------------------------------------------------------------------------------|
| Fall*          | NACRS or CIHI-DAD         | ICD 10 W00-W19                                                                                                                                                                                                                                                                                                                                                                                                                                                                                                                                                                                                                                                                                                                                                                                                                                                                                   |
| Any Fracture** | NACRS or CIHI-DAD or OHIP | <p><i>Hip</i> (ICD 10 S720, S721; CCI 1VA73, 1VC73, 1VA74, 1VA53, 1VC74, 1VA80)</p> <p><i>Forearm</i> (ICD 10 S52; CCI 1TV73, 1TV74, 1TV03; OHIP F014, F022, F023, F025, F026, F028, F030, F032, F033, F046, F024, F027, F031, Z203)</p> <p><i>Humerus</i> (ICD 10 S422, S423, S424)</p> <p><i>Vertebral</i> (S220, S221, S320, T080, T081)</p> <p><i>Femur</i> (ICD 10 S723; CCI 1VC73, 1VC74, 1VC03, 1VC80; OHIP F095, F096, F097, Z211)</p> <p><i>Pelvis</i> (ICD 10 S321, S322, S324, S323, S325, S327, S328)</p> <p><i>Ankle</i> (ICD 10 S825, S826, S827, S828, S829)</p> <p><i>Patella</i> (ICD 10 S820)</p> <p><i>Tibia/Fibula</i> (ICD 10 S821, S822, S823, S824)</p> <p><i>Ribs/sternum</i> (ICD 10 S222, S223, S224)</p> <p><i>Trunk</i> (ICD 10 S228, S29)</p> <p><i>Scapula</i> (ICD 10 S421, S29)</p> <p><i>Clavicle</i> (ICD 10 S420)</p> <p><i>Other</i> (ICD 10 M844, M843)</p> |

\*Using medical chart abstraction as the reference standard, PPV for ICD 10 codes for falls in NACRS is 91.4% (email communication, Dr Lisa-Ann Fraser, June 2015).

\*\*PPV for the coding combinations for fractures ranges between 0.81-0.96 depending on fracture site. Hip/femur fracture has an estimated PPV of 0.83<sup>1</sup>.

### Reference

1. Jean S, Candas B, Belzile É, et al. Algorithms can be used to identify fragility fracture cases in physician-claims databases. *Osteoporos Int.* 2012;23(2):483–501.

**Section 6.** Cohort description for patients who were dispensed an antipsychotic or a benzodiazepine during the study period.

|                                                                                                  | <b>Before<br/>(n=1,533)</b> | <b>After<br/>(n=3,707)</b> | <b>Standardized<br/>difference</b> |
|--------------------------------------------------------------------------------------------------|-----------------------------|----------------------------|------------------------------------|
| <b>Demographics</b>                                                                              |                             |                            |                                    |
| Age (Median (IQR))                                                                               | 75 (69-82)                  | 74 (69-81)                 | 2%                                 |
| Male sex                                                                                         | 908 (59.2%)                 | 2,144 (57.8%)              | 3%                                 |
| Lowest income quintile                                                                           | 269 (17.5%)                 | 758 (20.4%)                | 7%                                 |
| Highest income quintile                                                                          | 358 (23.4%)                 | 734 (19.8%)                | 9%                                 |
| Long Term Care resident                                                                          | 22 (1.4%)                   | 40 (1.1%)                  | 3%                                 |
| <b>Comorbidities</b>                                                                             |                             |                            |                                    |
| Charlson Comorbidity score (Median (IQR))                                                        | 0 (0-1)                     | 0 (0-2)                    | 9%                                 |
| Chronic Obstructive Pulmonary Disease                                                            | 116 (7.6%)                  | 293 (7.9%)                 | 1%                                 |
| Diabetes                                                                                         | 116 (7.6%)                  | 225 (6.1%)                 | 6%                                 |
| Hypertension                                                                                     | 185 (12.1%)                 | 344 (9.3%)                 | 9%                                 |
| Ischemic heart disease                                                                           | 331 (21.6%)                 | 606 (16.3%)                | 13%                                |
| Liver disease                                                                                    | 9 (0.6%)                    | 72 (1.9%)                  | 12%                                |
| Inflammatory bowel disease                                                                       | 158 (10.3%)                 | 453 (12.2%)                | 6%                                 |
| Renal disease                                                                                    | 92 (6.0%)                   | 367 (9.9%)                 | 10%                                |
| Arthritis                                                                                        | 8 (0.5%)                    | 23 (0.6%)                  | 1%                                 |
| Stroke                                                                                           | 50 (3.3%)                   | 129 (3.5%)                 | 1%                                 |
| Cerebrovascular disease                                                                          | 62 (4.0%)                   | 159 (4.3%)                 | 1%                                 |
| Dementia                                                                                         | <=5 (<=0.3%)                | 25 (0.7%)                  | 6%                                 |
| Congestive heart failure                                                                         | 249 (16.2%)                 | 673 (18.2%)                | 5%                                 |
| <b>Prior healthcare utilization</b>                                                              |                             |                            |                                    |
| Outpatient Internal medicine specialist visits in previous year (Median (IQR))                   | 0 (0-1)                     | 0 (0-1)                    | 19%                                |
| Primary care visits in previous year (Median (IQR))                                              | 2 (1-6)                     | 3 (1-8)                    | 9%                                 |
| <b>Medication utilization</b>                                                                    |                             |                            |                                    |
| Number of medications is previous year (Median (IQR))                                            | 7 (4-11)                    | 8 (4-11)                   | 6%                                 |
| Polypharmacy at admission ( $\geq 10$ different daily prescription medications in the last year) | 539 (35.2%)                 | 1,344 (36.3%)              | 2%                                 |

IQR: Interquartile Range
